# Supplementary material for: Phenotypic and molecular evolution across 10,000 generations in laboratory budding yeast populations
Source: eLife. 2021 Jan 19;10:e63910. doi: 10.7554/eLife.63910 (PMC7815316; doi:10.7554/eLife.63910)
Supplement: Supplementary file 1. — Includes daily notes, phenotype information for individual wells (including fitness), and a record of sample sizes for statistical tests. [file elife-63910-supp1.xlsx]

## Sheet: COLUMN KEY
COLUMN KEY
Full_Daily_Record	This sheet is transcribed from daily notebook entries for the experiment
Date	Day of transfer
Transfer.time	Time of transfer
Generation.on.sheet	Generation written down. The generation for the 4 columns below are calculated by going back through the record and adding up the generations, which sometimes deviate from the sheet due to record-keeping errors
P1.generation.of.saturated.culture	YPD 30°C environment plate generation
P2.generation.of.saturated.culture	SC 30°C environment plate generation
P3.generation.of.saturated.culture	SC 37°C environment plate generation
P4.generation.of.saturated.culture	P4 is a plate with 6 different yeast species evolving as part of a separate experiment (but transferred along with the others)
Freeze	Marked "Y" if the cultures were frozen this day
Unfroze	Marked "Y" if we unfroze from a glycerol stock this day
Person	Initials marking who did the transfer - note that early in the experiment this wasn't standardized, so some information is missing
Focal.timepoint	Marked "Y" if we froze a glycerol stock this day that we used for fitness assays or sequencing, row colored blue
Part.of.timeline	Marked "No" if the cultures on this day are not part of the experiments line of descent; when contamination happens and we go back to a glycerol stock, sometimes many days of transfers are recorded but are not actually part of the evolution experiment, row colored red
Notes	Any additional observations or notes on experimental issues
Well_Info	This sheet records information for each well
384_well	The 384-well plate location of this well in 384-well glycerol stocks
platewell	The coded population name, consisting of the plate name and well (e.g. P1A04 is in plate P1 in well A04)
plate	Plate name (see below for plate name -> environment key)
well	Well
contam	If this well was contaminated, by what species, if "No" this well has not been contaminated. Blank wells are also marked "blank" here
strain	Strain present in well
History	If contaminated or blank, any notes on when this occurred are kept here
Fitness_Data	This sheet has fitness measurements for each well
platewell	The coded population name, consisting of the plate name and well (e.g. P1A04 is in plate P1 in well A04)
plate	Plate name (see below for plate name -> environment key)
well	Well
GenX_s_R1	The s measurement for replicate 1 at generation X
GenX_s_R2	The s measurement for replicate 2 at generation X
GenX_s	The mean of the two replicate s measurements at generation X
GenX_s_scaled	GenX_s minus the measured fitness of a unlabeled reference strain ("2490A") on the same fitness assay plate - used to correct small batch effects
Fitness_Assay_Counts	This sheet has fitness assay cell counts for each well
platewell	The coded population name, consisting of the plate name and well (e.g. P1A04 is in plate P1 in well A04)
plate	Plate name (see below for plate name -> environment key)
well	Well
GenX_Ref_Counts_TY_RW	The number of cells in the reference gate in the corresponding FACS data for Generation X, fitness assay timepoint Y, Replicate W
GenX_NonRef_Counts_TY_RW	The number of cells NOT in the reference gate in the corresponding FACS data for Generation X, fitness assay timepoint Y, Replicate W
GenX_Uncorrected_Ref_Freq_TY_RW	The frequency of cells in the reference gate in the corresponding FACS data for Generation X, fitness assay timepoint Y, Replicate W
GenX_Corrected_Ref_Freq_TY_RW	The frequency of reference cells for Generation X, fitness assay timepoint Y, Replicate W - corrected based on the frequency of cells found in the reference cell gate in wells with only reference
Killer_Virus_State	This sheet has killing assay measurements for each well
platewell	The coded population name, consisting of the plate name and well (e.g. P1A04 is in plate P1 in well A04)
plate	Plate name (see below for plate name -> environment key)
well	Well
GX_killer_activity	The killer virus state, scored from 0-2, as described in Figure 9
GENERAL NOTES
Plate names -> Envs	P1: YPD 30°C, P2: SC 30°C, P3: SC 37°C
Generations	As you can see in the record, sometimes our recorded generations get off track from the actual generations due to propogating errors. We also have not always been consistent with the generation number we write on a glycerol stock - sometimes it is the number of generations of the saturated culture that day, and sometimes it is the number of generations of the saturated culture of the next day. In…
Generations in filenames	The generations used in sequencing and fitness assay filenames and in sequencing data column names correspond to the written generation numbers on the glycerol stock, so they are the same across all 3 plates. The dictionary below maps from these timepoints to the accurate generation numbers in the record (this is the dictionary we use when calculating rates of adaptation and making plots).
	# This dictionary changes the recorded generation numbers to the correct generation numbers # Since P3 only does 8 gens/day it is very different, the other differences are due to little recording errors gen_fixer = {70: {'P1': 70, 'P2': 70, 'P3': 56, 'P4': 70}, 550: {'P1': 560, 'P2': 560, 'P3': 448, 'P4': 560}, 1410: {'P1': 1410, 'P2': 1410, 'P3': 1128, 'P4': 1410}, 2640: {'P1': 2640, 'P2': 2640,…

## Sheet: Full_Daily_Record
Date	Transfer.time	Generation.on.sheet	P1.generation.of.saturated.culture	P2.generation.of.saturated.culture	P3.generation.of.saturated.culture	P4.generation.of.saturated.culture	Freeze	Unfroze	Person	Focal.timepoint	Part.of.timeline	Notes
2015-04-28	11:30:00	0	0	0	0	0			Mike?			Unfroze for all plates, 5 ul xferred into 124 ul of fresh media for P1-3, P4 spotted on YPD (3 ul) previously scraped
2015-04-29	11:30:00	10	10	10	8	10			Mike?			"Tetracycline double conc"
2015-04-30	11:30:00	20	20	20	16	20			Mike?			"Tetracycline double conc" Round bottom plates used instead of flat bottomed plates
2015-05-01	11:30:00	30	30	30	24	30			Mike?			"Tetracycline double conc"
2015-05-02	11:30:00	40	40	40	32	40			Mike?			"Tetracycline reverted to 1X as pichia seems to have trouble keeping up"
2015-05-03	11:30:00	50	50	50	40	50			Mike?
2015-05-04	11:30:00	60	60	60	48	60			Mike?			Pichia still growing slow but not being diluted out
2015-05-05	11:30:00	70	70	70	56	70	Y		Mike?	Y
2015-05-06	11:30:00	80	80	80	64	80			ANNB?
2015-05-07	11:30:00	90	90	90	72	90			ANNB?
2015-05-08	11:30:00	100	100	100	80	100			ANNB?			Biomek crashed on P4, P4 transferred by hand
2015-05-09	11:45:00	110	110	110	88	110			ANNB?			Switched tips to P1
2015-05-10	11:30:00	120	120	120	96	120			ANNB?			New tips for P2, P2 bottom right corner done by hand. glabrata contamination noticed.
2015-05-11	11:30:00	130	130	130	104	130			ANNB?			"Pombe was struggling, so I back transferred from the plates of the 11th transfer" P4_G1,P4_G2,P4_G3,P4_G4,P4_G5,P4_G6,P4_G7,P4_G8,P4_G9,P4_G10,P4_G11,P4_H9,P4_H10,P4_H11,P4_H12
2015-05-12	11:30:00	140	140	140	112	140			ANNB?
2015-05-13	11:30:00	150	150	150	120	150			ANNB?
2015-05-14	12:15:00	160	160	160	128	160	Y		MMD?
2015-05-15	12:00:00	170	170	170	136	170			MMD?
2015-05-16	12:00:00	180	180	180	144	180			MMD?
2015-05-17	12:00:00	190	190	190	152	190			MMD?
2015-05-18	11:45:00	200	200	200	160	200			MMD?
2015-05-19	11:30:00	210	210	210	168	210			MMD?
2015-05-20	11:30:00	220	220	220	176	220			MMD?
2015-05-21	12:15:00	230	230	230	184	230			KK
2015-05-22	11:45:00	240	240	240	192	240	Y		?
2015-05-23	11:30:00	250	250	250	200	250			?
2015-05-24	11:30:00	260	260	260	208	260			?
2015-05-25	11:45:00	270	270	270	216	270			?
2015-05-26	11:30:00	280	280	280	224	280			?
2015-05-27	11:30:00	290	290	290	232	290	Y		?
2015-05-28	11:45:00	300	300	300	240	300			?
2015-05-29	13:00:00	310	310	310	248	310			?			P4_H1,P4_H2,P4_H3,P4_H4 look low on density
2015-05-30	12:30:00	320	320	320	256	320			?			New P4 tips
2015-05-31	12:00:00	330	330	330	264	330			?			"Putting P4 back in 30C for extra day to re-seed rows F+G" (pretty sure this wasn't ever used though)
2015-06-01	11:45:00	340	340	340	272	340			?			"P4 rows look like they're catching up, so will not re-seed"
2015-06-02	?	350	350	350	280	350			?
2015-06-03	?	360	360	360	288	360	Y		?
2015-06-04	12:30:00	370	370	370	296	370			?			Missing P4_B1,P1_A11 (went blank I assume)
2015-06-05	13:00:00	380	380	380	304	380			?			P4_G2 done by hand
2015-06-06	12:30:00	390	390	390	312	390			?
2015-06-07	12:00:00	400	400	400	320	400			?
2015-06-08	?	410	410	410	328	410	Y		?			Biomek broke, P1-3 frozen in glycerol, P4 put in fridge
2015-06-10	night sometime							Y	?			"Pipetted 10 ul of the defrosted gly. into 128 ul YPD"
2015-06-11	12:00:00	420	420	420	336	420	Y		?			Normal transfer plus froze a 384
2015-06-12	11:45:00	430	430	430	344	430			?
2015-06-13	11:15:00	440	440	440	352	440			?
2015-06-14	15:00:00	450	450	450	360	450			?
2015-06-15	15:15:00	460	460	460	368	460			?
2015-06-16	?	470	470	470	376	470			?
2015-06-17	?	480	480	480	384	480			?
2015-06-18	13:30:00	490	490	490	392	490	Y		?
2015-06-19	14:00:00	500	500	500	400	500			?
2015-06-20	14:00:00	510	510	510	408	510			?
2015-06-21	13:30:00	520	520	520	416	520			?
2015-06-22	13:15:00	530	530	530	424	530			?
2015-06-23	13:00:00	540	540	540	432	540			?
2015-06-24	13:00:00	550	550	550	440	550			?
2015-06-25	13:00:00	560	560	560	448	560	Y		MMD	Y
2015-06-26	13:00:00	570	570	570	456	570			MMD			SC looked contaminated (but turned out it wasn't)
2015-06-27	13:00:00	580	580	580	464	580			ERJ			SC not contaminated
2015-06-28	13:15:00	590	590	590	472	590			MMD
2015-06-29	13:00:00	600	600	600	480	600			MMD
2015-06-30	13:15:00	610	610	610	488	610			MMD
2015-07-01	13:10:00	620	620	620	496	620			MMD
2015-07-02	13:00:00	630	630	630	504	630	Y		?
2015-07-03	13:00:00	640	640	640	512	640			?		No
2015-07-04	16:00:00	650	650	650	520	650			?		No
2015-07-05	13:30:00	660	660	660	528	660			?		No	P3 not saturated, so I used "a milder dilution (128 vs. 256)"
2015-07-06	13:30:00	670	670	670	535	670			KK		No
2015-07-07	13:30:00	680	680	680	543	680			KK		No
2015-07-08	13:30:00	690	690	690	551	690			KK		No
2015-07-09	12:15:00	700	700	700	559	700	Y		Mike		No
2015-07-10	12:20:00	710	710	710	567	710			?		No
2015-07-11	12:30:00	720	720	720	575	720			?		No
2015-07-12	12:30:00	730	730	730	583	730			?		No
2015-07-13	12:05:00	740	740	740	591	740			?		No
2015-07-14	11:45:00	750	750	750	599	750			?		No
2015-07-15	12:50:00	760	760	760	607	760			?		No	SC contaminated, can be traced back to 7/11/15
2015-07-16	13:00:00	710						Y	?		No	Unfroze from 700 (stock from 7/9/15)
2015-07-18	13:00:00	720	710	710	567	710			?		No	Had to wait 48 hours for full regrowth
2015-07-19	13:00:00	730	720	720	575	720			?		No
2015-07-20	12:45:00	740	730	730	583	730			?		No	Pichia struggling
2015-07-21	12:30:00	750	740	740	591	740			?		No	P2_B10 weird growth
2015-07-22	12:30:00	760	750	750	599	750			?		No
2015-07-23	13:00:00	770	760	760	607	760	Y		?		No
2015-07-24	12:30:00	780	770	770	615	770			?		No
2015-07-25	13:30:00	790	780	780	623	780			?		No
2015-07-26	13:15:00	800	790	790	631	790			?		No
2015-07-27	14:00:00	630						Y	?			Contamination issues again, thinking contamination predated gen 700, unfreezing from gen 630, 1/ 2^5 dilution into the normal media
2015-07-29	12:00:00	640	640	640	512	640			?			Gave the plates extra time to grow up, Michael splashed the lid of P1, esp. top two rows
2015-07-30	13:00:00	650	650	650	520	650			?
2015-07-31	13:00:00	660	660	660	528	660			KK
2015-08-01	13:00:00	670	670	670	536	670			KK
2015-08-02	13:00:00	680	680	680	544	680			KK
2015-08-03	13:00:00	690	690	690	552	690			?			P1_B2 transferred by hand
2015-08-04	13:00:00	700	700	700	560	700	Y		?
2015-08-05	13:00:00	710	710	710	568	710			?			P1_B2 dropped again
2015-08-06	13:00:00	720	720	720	576	720			?
2015-08-07	13:30:00	730	730	730	584	730			Mike
2015-08-08	13:00:00	740	740	740	592	740			?
2015-08-09	13:15:00	750	750	750	600	750			?
2015-08-10	13:30:00	760	760	760	608	760			?
2015-08-11	13:40:00	770	770	770	616	770			?
2015-08-12	13:30:00	780	780	780	624	780	Y		?
2015-08-13	13:30:00	790	790	790	632	790			?
2015-08-14	13:30:00	800	800	800	640	800			?
2015-08-15	12:40:00	810	810	810	648	810			?
2015-08-16	13:00:00	820	820	820	656	820			?
2015-08-17	13:30:00	830	830	830	664	830			?
2015-08-18	13:45:00	840	840	840	672	840			?
2015-08-19	13:00:00	850	850	850	680	850	Y		?
2015-08-20	12:45:00	860	860	860	688	860			?
2015-08-21	12:45:00	870	870	870	696	870			?
2015-08-22	12:45:00	880	880	880	704	880			?
2015-08-23	12:45:00	890	890	890	712	890			?
2015-08-24	13:00:00	900	900	900	720	900			?
2015-08-25	13:00:00	910	910	910	728	910			?
2015-08-26	13:00:00	920	920	920	736	920	Y		?
2015-08-27	13:30:00	930	930	930	744	930			KK		No
2015-08-28	13:15:00	940	940	940	752	940			KK		No
2015-08-29	13:00:00	950	950	950	760	950			?		No
2015-08-30	13:30:00	960	960	960	768	960			?		No	Bacterial contamination in P1 and P4, passaging from 8/28/15 plates that were in the cold room for 2 days. Changed P1 and P4 tips and used new YPD
2015-08-31	13:15:00	970	970	970	776	970			?		No
2015-09-01	13:30:00	980	980	980	784	980			?		No
2015-09-02	14:00:00	990	990	990	792	990			?		No	Bacterial contamination in P1 + P4. Transferring yesterday's plates into 34 ug/ml chloramphenicol for YPD.
2015-09-03	13:30:00	1000	1000	1000	800	1000	Y		?		No
2015-09-04	13:00:00	1010	1010	1010	808	1010			?		No
2015-09-05	16:00:00							Y	?			Bacterial contamination again, unfreezing from 8/26/15
2015-09-07	14:15:00	930	930	930	744	930			?
2015-09-08	16:15:00	940	940	940	752	940			?
2015-09-09	15:00:00	950	950	950	760	950			?
2015-09-10									?			No entry for 9/10/15 ???
2015-09-11	15:00:00	960	960	960	768	960			?
2015-09-12	15:30:00	970	970	970	776	970			?
2015-09-13	18:30:00	980	980	980	784	980			?
2015-09-14	19:00:00	990	990	990	792	990			?
2015-09-15	20:00:00	1000	1000	1000	800	1000			?
2015-09-16	19:30:00	1010	1010	1010	808	1010	Y		?
2015-09-17									?			Looks like no transfer on 9/17/15
2015-09-18	15:00:00	1020	1020	1020	816	1020			?
2015-09-19	13:00:00	1030	1030	1030	824	1030			ANNB			Previous generation P2 and P4 were round bottom, back to flat now
2015-09-20	12:45:00	1040	1040	1040	832	1040			?			Pichia struggling
2015-09-21	13:00:00	1050	1050	1050	840	1050			?
2015-09-22	12:30:00	1060	1060	1060	848	1060			?
2015-09-23	13:00:00	1070	1070	1070	856	1070	Y		?
2015-09-24	13:00:00	1080	1080	1080	864	1080			?			P2 was bumped, no visible cross-contamination
2015-09-25	12:30:00	1080	1090	1090	872	1090			?			Not sure why sheet says 1080 for two days in a row
2015-09-26	13:30:00	1090	1100	1100	880	1100			?
2015-09-27	?	1100	1110	1110	888	1110			?
2015-09-28	?	1110	1120	1120	896	1120			?
2015-09-29	?	1120	1130	1130	904	1130			?
2015-09-30	?	1130	1140	1140	912	1140			?		No	9/30/15 is in the book twice for some reason, generation numbers are all over the place here...
2015-10-01	?	1150	1150	1150	920	1150	Y		?		No
2015-10-02	14:00:00	1140	1140	1140	912	1140			?			Contamination found in SC, transferring from 2 day old plates in hope that it predates contamination.
2015-10-03	13:30:00	1150	1150	1150	920	1150	Y		?
2015-10-04	12:30:00	1160	1160	1160	928	1160			?
2015-10-05	13:00:00	1170	1170	1170	936	1170			?
2015-10-06	13:00:00	1180	1180	1180	944	1180			?
2015-10-07	13:00:00	1190	1190	1190	952	1190			?
2015-10-08	13:00:00	1200	1200	1200	960	1200	Y		?
2015-10-09	14:00:00	1210	1210	1210	968	1210			?
2015-10-10	13:45:00	1220	1220	1220	976	1220			?
2015-10-11	16:45:00	1230	1230	1230	984	1230			?
2015-10-12	16:00:00	1240	1240	1240	992	1240			?
2015-10-13	15:15:00	1250	1250	1250	1000	1250			?
2015-10-14	?	1260	1260	1260	1008	1260			?
2015-10-15	15:30:00	1270	1270	1270	1016	1270	Y		?
2015-10-16	14:30:00	1280	1280	1280	1024	1280			?
2015-10-17	15:00:00	1290	1290	1290	1032	1290			?
2015-10-18	15:00:00	1300	1300	1300	1040	1300			?
2015-10-19	14:00:00	1310	1310	1310	1048	1310			?
2015-10-20	13:45:00	1320	1320	1320	1056	1320			?
2015-10-21	14:00:00	1330	1330	1330	1064	1330			?
2015-10-22	14:00:00	1340	1340	1340	1072	1340	Y		?
2015-10-23	14:15:00	1350	1350	1350	1080	1350			?
2015-10-24	14:00:00	1360	1360	1360	1088	1360			?
2015-10-25	14:15:00	1370	1370	1370	1096	1370			?
2015-10-26	14:00:00	1380	1380	1380	1104	1380			?
2015-10-27	?	1390	1390	1390	1112	1390			?
2015-10-28	?	1400	1400	1400	1120	1400			?
2015-10-30	13:30:00	1410	1410	1410	1128	1410	Y		?	Y		Plates forgotten yesterday, put in 4C and resumed today.
2015-10-31	13:30:00	1420	1420	1420	1136	1420			?
2015-11-01	13:30:00	1430	1430	1430	1144	1430			?
2015-11-02	13:00:00	1440	1440	1440	1152	1440			?
2015-11-03	13:30:00	1450	1450	1450	1160	1450			?
2015-11-04	13:30:00	1460	1460	1460	1168	1460			?			P2 splashed lid
2015-11-05	14:00:00	1470	1470	1470	1176	1470			?
2015-11-06	?	1480	1480	1480	1184	1480	Y		?			Froze in 96 well plates
2015-11-30	?	1480					Y?	Y	?			Unfroze I assume
2015-12-01	?	1490	1490	1490	1192	1490			?
2015-12-02	?	1500	1500	1500	1200	1500			?
2015-12-03	?	1510	1510	1510	1208	1510			?
2015-12-04	15:00:00	1520	1520	1520	1216	1520			?
2015-12-05	14:45:00	1530	1530	1530	1224	1530			?
2015-12-06	15:30:00	1540	1540	1540	1232	1540			?
2015-12-07	?	1550	1550	1550	1240	1550			?
2015-12-08	13:00:00	1560	1560	1560	1248	1560			?
2015-12-09	13:40:00	1570	1570	1570	1256	1570	Y		?
2015-12-10	14:40:00	1580	1580	1580	1264	1580			?
2015-12-11	13:40:00	1590	1590	1590	1272	1590			?
2015-12-12	?	1600	1600	1600	1280	1600			?
2015-12-13	?	1610	1610	1610	1288	1610			?
2015-12-14	?	1620	1620	1620	1296	1620	Y		?
2015-12-15	?	1630	1630	1630	1304	1630			MSJ
2015-12-16	?	1640	1640	1640	1312	1640			MSJ
2015-12-17	?	1650	1650	1650	1320	1650			MSJ
2015-12-18	?	1660	1660	1660	1328	1660			MSJ
2015-12-19	?	1670	1670	1670	1336	1670			MSJ
2015-12-20	13:20:00	1680	1680	1680	1344	1680			MSJ
2015-12-21	13:00:00	1690	1690	1690	1352	1690	Y		Mike
2015-12-22	12:45:00	1700	1700	1700	1360	1700			?
2015-12-23	13:30:00	1710	1710	1710	1368	1710			?
2015-12-24	14:00:00	1720	1720	1720	1376	1720			?
2015-12-25	13:30:00	1730	1730	1730	1384	1730			?
2015-12-26	13:00:00	1740	1740	1740	1392	1740			?
2015-12-27	13:30:00	1750	1750	1750	1400	1750			?
2015-12-28	?	1760	1760	1760	1408	1760	Y		?
2015-12-29	?	1770	1770	1770	1416	1770			?
2015-12-30	?	1780	1780	1780	1424	1780			?
2015-12-31	?	1790	1790	1790	1432	1790			?
2016-01-01	?	1800	1800	1800	1440	1800			?
2016-01-02	?	1810	1810	1810	1448	1810			?
2016-01-03	?	1820	1820	1820	1456	1820			?
2016-01-04	?	1830	1830	1830	1464	1830	Y		?
2016-01-05	?	1840	1840	1840	1472	1840			?		No
2016-01-07	13:30:00							Y	?			Missed 1/6, so unfroze from 1/4/16
2016-01-09	14:00:00	1840	1840	1840	1472	1840			?			Gave them ~48hr to grow up from freezer stock
2016-01-10	16:30:00	1850	1850	1850	1480	1850			?
2016-01-11	16:00:00	1860	1860	1860	1488	1860	Y		?
2016-01-12	15:00:00	1870	1870	1870	1496	1870			?
2016-01-13	14:30:00	1880	1880	1880	1504	1880			?
2016-01-14	14:00:00	1890	1890	1890	1512	1890			?
2016-01-15	13:30:00	1900	1900	1900	1520	1900			?
2016-01-16	13:30:00	1910	1910	1910	1528	1910			?
2016-01-17	14:30:00	1920	1920	1920	1536	1920			?
2016-01-18	13:30:00	1930	1930	1930	1544	1930	Y		?
2016-01-19	13:30:00	1940	1940	1940	1552	1940			?
2016-01-20	13:30:00	1950	1950	1950	1560	1950			?
2016-01-21	?	1960	1960	1960	1568	1960			?
2016-01-22	?	1970	1970	1970	1576	1970			?			SC batch seems to dilute the cells out
2016-01-23	?	1980	1980	1980	1584	1980			?
2016-01-24	?	1990	1990	1990	1592	1990			?
2016-01-25	?	2000	2000	2000	1600	2000	Y		?			P3 has few wells with "film-like" morphology
2016-01-26	14:00:00	2010	2010	2010	1608	2010			MSJ
2016-01-27	13:45:00	2020	2020	2020	1616	2020			MSJ
2016-01-28	13:35:00	2030	2030	2030	1624	2030			MSJ
2016-01-29	13:45:00	2040	2040	2040	1632	2040			MSJ
2016-01-30	13:45:00	2050	2050	2050	1640	2050			MSJ
2016-01-31	14:05:00	2060	2060	2060	1648	2060			MSJ
2016-02-01	14:45:00	2070	2070	2070	1656	2070	Y		?			P2_ALL, P3_ALL look sparse, maybe bad media batch
2016-02-02	15:30:00	2080	2080	2080	1664	2080			?			P2_ALL was accidentally put in 37C and P3_ALL was accidentally put in 30C (notebook says the opposite but I think this is what they meant)
2016-02-03	17:20:00	2090	2090	2090	1672	2090			?
2016-02-04	?	2100	2100	2100	1680	2100	Y		?			Lost P3_B2,P3_B3,P3_B4,P3_B5 a few days back, freezing today because P2,P3 were at low density in the last freeze
2016-02-05	?	2110	2110	2110	1688	2110			?
2016-02-06	?	2120	2120	2120	1696	2120			?
2016-02-07	?	2130	2130	2130	1704	2130			?
2016-02-08	13:15:00	2140	2140	2140	1712	2140	Y		KK
2016-02-09	13:15:00	2150	2150	2150	1720	2150			?
2016-02-10	?	2160	2160	2160	1728	2160			?
2016-02-11	14:00:00	2170	2170	2170	1736	2170			?
2016-02-12	?	2180	2180	2180	1744	2180			?
2016-02-13	?	2190	2190	2190	1752	2190			?
2016-02-14	?	2200	2200	2200	1760	2200			?
2016-02-15	?	2210	2210	2210	1768	2210	Y		?
2016-02-16	14:00:00	2220	2220	2220	1776	2220			ANNB
2016-02-17	13:00:00	2230	2230	2230	1784	2230			ANNB
2016-02-18	13:30:00	2240	2240	2240	1792	2240			ANNB
2016-02-19	13:30:00	2250	2250	2250	1800	2250			ANNB
2016-02-20	13:30:00	2260	2260	2260	1808	2260			ANNB
2016-02-21	13:30:00	2270	2270	2270	1816	2270			ANNB
2016-02-22	13:30:00	2280	2280	2280	1824	2280	Y		ANNB
2016-02-23	13:45:00	2290	2290	2290	1832	2290			MSJ
2016-02-24	13:45:00	2300	2300	2300	1840	2300			MSJ
2016-02-25	14:15:00	2310	2310	2310	1848	2310			MSJ
2016-02-26	14:00:00	2320	2320	2320	1856	2320			MSJ
2016-02-27	?	2330	2330	2330	1864	2330			MSJ
2016-02-28	?	2340	2340	2340	1872	2340			ANNB
2016-02-29	?	2350	2350	2350	1880	2350			MSJ
2016-03-01	?	2360	2360	2360	1888	2360	Y		MSJ
2016-03-02	?	2370	2370	2370	1896	2370			?
2016-03-03	?	2380	2380	2380	1896	2380			?			Tripped and got lots of liquid on P3 lid, so transferred from gen 2360 (3/1/16) plate that was on bench
2016-03-04	?	2390	2390	2390	1904	2390			?
2016-03-05	?	2400	2400	2400	1912	2400			?
2016-03-06	?	2410	2410	2410	1920	2410			?
2016-03-07	?	2420	2420	2420	1928	2420			?
2016-03-08	?	2430	2430	2430	1936	2430	Y		?
2016-03-09	?	2440	2440	2440	1944	2440			?
2016-03-10	14:30:00	2450	2450	2450	1952	2450			?
2016-03-11	14:00:00	2460	2460	2460	1960	2460			?
2016-03-12	?	2470	2470	2470	1968	2470			?
2016-03-13	?	2480	2480	2480	1976	2480			?
2016-03-14	?	2490	2490	2490	1984	2490			?
2016-03-15	?	2500	2500	2500	1992	2500	Y		?
2016-03-16	14:00:00	2510	2510	2510	2000	2510			?
2016-03-17	14:00:00	2520	2520	2520	2008	2520			?
2016-03-18	14:00:00	2530	2530	2530	2016	2530			?
2016-03-19	?	2540	2540	2540	2024	2540			?
2016-03-20	14:00:00	2550	2550	2550	2032	2550			?
2016-03-21	16:00:00	2560	2560	2560	2040	2560			?
2016-03-22	?	2570	2570	2570	2048	2570	Y		?
2016-03-23	?	2580	2580	2580	2056	2580			KK
2016-03-24	13:30:00	2590	2590	2590	2064	2590			KK			Lost P3_A7,P3_A8,P3_A9,P3_A10,P3_A11,P3_A12,P3_B12 due to evaporation
2016-03-25	13:30:00	2600	2600	2600	2072	2600			KK
2016-03-26	14:00:00	2610	2610	2610	2080	2610			KK
2016-03-27	13:00:00	2620	2620	2620	2088	2620			KK
2016-03-28	13:30:00	2630	2630	2630	2096	2630			KK
2016-03-29	14:00:00	2640	2640	2640	2104	2640	Y		KK	Y
2016-03-30	13:35:00	2650	2650	2650	2112	2650			MSJ
2016-03-31	13:40:00	2660	2660	2660	2120	2660			MSJ
2016-04-01	?	2670	2670	2670	2128	2670			MSJ
2016-04-02	13:40:00	2680	2680	2680	2136	2680			MSJ
2016-04-03	13:55:00	2690	2690	2690	2144	2690			MSJ
2016-04-04	13:45:00	2700	2700	2700	2152	2700			MSJ
2016-04-05	13:50:00	2710	2710	2710	2160	2710	Y		MSJ
2016-04-06	14:00:00	2720	2720	2720	2168	2720			?
2016-04-07	14:00:00	2730	2730	2730	2176	2730			?
2016-04-08	14:00:00	2740	2740	2740	2184	2740			?
2016-04-09	14:00:00	2750	2750	2750	2192	2750			?
2016-04-10	13:30:00	2760	2760	2760	2200	2760			?
2016-04-11	14:00:00	2770	2770	2770	2208	2770			?
2016-04-12	15:00:00	2780	2780	2780	2216	2780	Y		?
2016-04-13	15:00:00	2790	2790	2790	2224	2790			Julia
2016-04-14	15:00:00	2800	2800	2800	2232	2800			Julia
2016-04-15	15:00:00	2810	2810	2810	2240	2810			Julia
2016-04-16	15:00:00	2820	2820	2820	2248	2820			Julia
2016-04-17	16:00:00	2830	2830	2830	2256	2830			Julia
2016-04-18	15:45:00	2840	2840	2840	2264	2840			Julia
2016-04-19	15:15:00	2850	2850	2850	2272	2850	Y		Julia
2016-04-20	?	2860	2860	2860	2280	2860			ANNB
2016-04-21	?	2870	2870	2870	2288	2870			ANNB
2016-04-22	?	2880	2880	2880	2296	2880			ANNB
2016-04-23	?	2890	2890	2890	2304	2890			ANNB
2016-04-24	?	2900	2900	2900	2312	2900			ANNB
2016-04-25	?	2910	2910	2910	2320	2910			ANNB
2016-04-26	?	2920	2920	2920	2328	2920	Y		ANNB
2016-04-27	13:00:00	2930	2930	2930	2336	2930			KK
2016-04-28	?	2940	2940	2940	2344	2940			KK
2016-04-29	?	2950	2950	2950	2352	2950			KK
2016-04-30	?	2960	2960	2960	2360	2960			KK
2016-05-01	?	2970	2970	2970	2368	2970			KK			Ran out of SC, used water for SM
2016-05-02	?	2980	2980	2980	2376	2980			KK			P3_H6 got bottlenecked to a few cells
2016-05-03	?	2990	2990	2990	2384	2990	Y		KK
2016-05-04	14:05:00	3000	3000	3000	2392	3000			MSJ
2016-05-05	14:00:00	3010	3010	3010	2400	3010			MSJ
2016-05-06	13:45:00	3020	3020	3020	2408	3020			MSJ
2016-05-07	13:55:00	3030	3030	3030	2416	3030			MSJ
2016-05-08	14:00:00	3040	3040	3040	2424	3040			MSJ
2016-05-09	14:00:00	3050	3050	3050	2432	3050			MSJ
2016-05-10	14:00:00	3060	3060	3060	2440	3060	Y		MSJ
2016-05-11	14:10:00	3070	3070	3070	2448	3070			?
2016-05-12	14:10:00	3080	3080	3080	2456	3080			?
2016-05-13	14:30:00	3090	3090	3090	2464	3090			?
2016-05-14	14:10:00	3100	3100	3100	2472	3100			?
2016-05-15	17:00:00	3110	3110	3110	2480	3110			?
2016-05-16	16:20:00	3120	3120	3120	2488	3120			?
2016-05-17	15:10:00	3130	3130	3130	2496	3130	Y		?
2016-05-18	15:00:00	3140	3140	3140	2504	3140			Julia		No
2016-05-19	?	3150	3140	3140	2504	3140			Julia		No	Slow growth in YPD - forgot Dextrose, used yesterday's plates left on bench to restart
2016-05-20	?	3160	3150	3150	2512	3150			Julia		No
2016-05-21	?	3170	3160	3160	2520	3160			Julia		No	Contamination in plates on bench
2016-05-23	?							Y	Julia			Restarted from gen 3130 freeze
2016-05-25	13:00:00	3120	3140	3140	2504	3140			Julia			Not sure why gen on the sheet reads 3120 instead of 3140, but ok
2016-05-26	13:30:00	3130	3150	3150	2512	3150			ANNB
2016-05-27	?	3140	3160	3160	2520	3160			ANNB
2016-05-28	?	3150	3170	3170	2528	3170			ANNB
2016-05-29	?	3160	3180	3180	2536	3180			ANNB		No
2016-05-30	?	3170	3190	3190	2544	3190			ANNB		No
2016-05-31	?	3160	3180	3180	2536	3180	Y		ANNB			Contamination spotted. Restarted from clean day (I'm assuming this means 5/29/16)
2016-06-01	?	3170	3190	3190	2544	3190			KK
2016-06-02	13:00:00	3180	3200	3200	2552	3200			KK
2016-06-03	13:30:00	3190	3210	3210	2560	3210			KK
2016-06-04	13:30:00	3200	3220	3220	2568	3220			KK
2016-06-05	13:30:00	3210	3230	3230	2576	3230			KK
2016-06-06	13:30:00	3220	3240	3240	2584	3240			KK
2016-06-07	13:45:00	3230	3250	3250	2592	3250	Y		KK
2016-06-08	13:45:00	3240	3260	3260	2600	3260			?
2016-06-09	14:00:00	3250	3270	3270	2608	3270			?
2016-06-10	13:45:00	3260	3280	3280	2616	3280			?
2016-06-11	14:30:00	3270	3290	3290	2624	3290			?
2016-06-12	14:30:00	3280	3300	3300	2632	3300			?
2016-06-13	14:00:00	3290	3310	3310	2640	3310			?
2016-06-14	14:05:00	3300	3320	3320	2648	3320	Y		MSJ
2016-06-15	13:58:00	3310	3330	3330	2656	3330			MSJ
2016-06-16	14:00:00	3320	3340	3340	2664	3340			MSJ
2016-06-17	14:04:00	3330	3350	3350	2672	3350			MSJ
2016-06-18	13:00:00	3340	3360	3360	2680	3360			ANNB
2016-06-19	14:10:00	3350	3370	3370	2688	3370			MSJ
2016-06-20	14:00:00	3360	3380	3380	2696	3380			MSJ
2016-06-21	?	3370	3390	3390	2704	3390	Y		CWB
2016-06-22	?	3380	3400	3400	2712	3400			CWB
2016-06-23	?	3390	3410	3410	2720	3410			CWB
2016-06-24	?	3400	3420	3420	2728	3420			CWB			D4 tip didn't pick up on fill, did manually
2016-06-25	?	3410	3430	3430	2736	3430			CWB
2016-06-26	?	3420	3440	3440	2744	3440			CWB
2016-06-27	?	3430	3450	3450	2752	3450			CWB
2016-06-28	?	3440	3460	3460	2760	3460	Y		CWB
2016-06-29	14:00:00	3450	3470	3470	2768	3470			?
2016-06-30	?	3460	3480	3480	2776	3480			?
2016-07-01	?	3470	3490	3490	2784	3490			?
2016-07-02	?	3480	3500	3500	2792	3500			?
2016-07-03	14:30:00	3490	3510	3510	2800	3510			?
2016-07-04	14:00:00	3500	3520	3520	2808	3520			?
2016-07-05	?	3510	3530	3530	2816	3530	Y		?
2016-07-06	?	3520	3540	3540	2824	3540			?
2016-07-07	?	3530	3550	3550	2832	3550			?
2016-07-08	?	3540	3560	3560	2840	3560			?
2016-07-09	?	3550	3570	3570	2848	3570			?
2016-07-10	?	3560	3580	3580	2856	3580			?
2016-07-11	?	3570	3590	3590	2864	3590			?
2016-07-12	?	3580	3600	3600	2872	3600	Y		?
2016-07-13	15:50:00	3590	3610	3610	2880	3610			MSJ
2016-07-14	15:50:00	3600	3620	3620	2888	3620			MSJ
2016-07-15	15:40:00	3610	3630	3630	2896	3630			MSJ
2016-07-16	15:30:00	3620	3640	3640	2904	3640			MSJ
2016-07-17	15:25:00	3630	3650	3650	2912	3650			MSJ
2016-07-18	15:45:00	3640	3660	3660	2920	3660	Y		MSJ	Y
2016-07-19	15:45:00	3650	3670	3670	2928	3670			CWB
2016-07-20	15:50:00	3660	3680	3680	2936	3680			CWB
2016-07-21	15:30:00	3670	3690	3690	2944	3690			CWB
2016-07-22	15:15:00	3680	3700	3700	2952	3700			CWB
2016-07-23	15:00:00	3690	3710	3710	2960	3710			ANNB			P4_F7 doesn't look like Pombe
2016-07-24	15:50:00	3700	3720	3720	2968	3720			CWB
2016-07-25	15:42:00	3710	3730	3730	2976	3730			CWB
2016-07-26	15:22:00	3720	3740	3740	2984	3740			CWB			Originally froze, but the plate didn't make it into the -80
2016-07-27	15:00:00	3730	3750	3750	2992	3750			KK
2016-07-28	14:00:00	3740	3760	3760	3000	3760			?
2016-07-29	13:00:00	3750	3770	3770	3008	3770			?
2016-07-30	12:15:00	3760	3780	3780	3016	3780			?
2016-07-31	13:00:00	3770	3790	3790	3024	3790			?
2016-08-01	13:00:00	3780	3800	3800	3032	3800			?
2016-08-02	13:00:00	3790	3810	3810	3040	3810	Y		?
2016-08-03	14:00:00	3800	3820	3820	3048	3820			?
2016-08-04	15:00:00	3810	3830	3830	3056	3830			?
2016-08-05	14:00:00	3820	3840	3840	3064	3840			?
2016-08-06	14:00:00	3830	3850	3850	3072	3850			?
2016-08-07	14:30:00	3840	3860	3860	3080	3860			?
2016-08-08	14:30:00	3850	3870	3870	3088	3870			?
2016-08-09	13:00:00	3860	3880	3880	3096	3880	Y		?
2016-08-10	13:30:00	3870	3890	3890	3104	3890			?		No
2016-08-11	13:30:00	3880	3900	3900	3112	3900			?		No
2016-08-12	?	3890	3910	3910	3120	3910			?		No
2016-08-13	?	3900	3920	3920	3128	3920			?		No
2016-08-14	17:30:00	3910	3930	3930	3136	3930			?		No
2016-08-15	14:30:00	3920	3940	3940	3144	3940			?		No	Might have bottlenecked P3
2016-08-16								Y	?			Some blanks got filled in, unfreezing from 3850 archive (8/9/16)
2016-08-17	17:25:00	3870	3890	3890	3104	3890			MSJ
2016-08-18	17:40:00	3880	3900	3900	3112	3900			MSJ
2016-08-19	17:20:00	3890	3910	3910	3120	3910			MSJ
2016-08-20	17:25:00	3900	3920	3920	3128	3920			CWB			Did xfer, realized plates weren't shaken enough, then redid xfer
2016-08-21	17:10:00	3910	3930	3930	3136	3930			MSJ
2016-08-22	16:50:00	3920	3940	3940	3144	3940			MSJ
2016-08-23	16:40:00	3930	3950	3950	3152	3950	Y		MSJ			Splashed P2 lid columns 1-3, but pretty sure no xcontam
2016-08-24	16:20:00	3940	3960	3960	3160	3960			CWB
2016-08-25	16:00:00	3950	3970	3970	3168	3970			CWB
2016-08-26	16:00:00	3960	3980	3980	3176	3980			CWB
2016-08-27	15:50:00	3970	3990	3990	3184	3990			CWB
2016-08-28	15:30:00	3980	4000	4000	3192	4000			CWB
2016-08-29	15:10:00	3990	4010	4010	3200	4010			CWB
2016-08-30	14:50:00	4000	4020	4020	3208	4020	Y		CWB
2016-08-31	14:40:00	4010	4030	4030	3216	4030			KK
2016-09-01	14:15:00	4020	4040	4040	3224	4040			KK
2016-09-02	14:10:00	4030	4050	4050	3232	4050			KK
2016-09-03	15:10:00	4040	4060	4060	3240	4060			KK
2016-09-04	14:30:00	4050	4070	4070	3248	4070			KK
2016-09-05	14:00:00	4060	4080	4080	3256	4080			KK
2016-09-06	14:00:00	4070	4090	4090	3264	4090			ANNB
2016-09-07	14:00:00	4080	4100	4100	3272	4100	Y		ANNB
2016-09-08	15:00:00	4090	4110	4110	3280	4110			ANNB
2016-09-09	14:00:00	4100	4120	4120	3288	4120			ANNB
2016-09-10	14:00:00	4110	4130	4130	3296	4130			ANNB
2016-09-11	14:00:00	4120	4140	4140	3304	4140			ANNB
2016-09-12	14:00:00	4130	4150	4150	3312	4150			ANNB
2016-09-13	?	4140	4160	4160	3320	4160	Y		ANNB
2016-09-14	13:40:00	4150	4170	4170	3328	4170			MSJ			SC had major precipitates, filter sterilized it and will monitor
2016-09-15	13:30:00	4160	4180	4180	3336	4180			MSJ
2016-09-16	13:40:00	4170	4190	4190	3344	4190			MSJ
2016-09-17	?	4180	4200	4200	3352	4200			ANNB
2016-09-18	13:30:00	4190	4210	4210	3360	4210			MSJ
2016-09-19	13:15:00	4200	4220	4220	3368	4220			MSJ
2016-09-20	13:15:00	4210	4230	4230	3376	4230	Y		MSJ
2016-09-21	12:55:00	4220	4240	4240	3384	4240			CWB
2016-09-22	12:48:00	4230	4250	4250	3392	4250			CWB
2016-09-23	12:30:00	4240	4260	4260	3400	4260			CWB
2016-09-24	12:15:00	4250	4270	4270	3408	4270			CWB
2016-09-25	12:15:00	4260	4280	4280	3416	4280			CWB			SC bottle looked contaminated? Filter sterilized
2016-09-26	12:20:00	4270	4290	4290	3424	4290			CWB
2016-09-27	12:15:00	4280	4300	4300	3432	4300	Y		CWB
2016-09-28	12:20:00	4290	4310	4310	3440	4310			MSJ
2016-09-29	12:15:00	4300	4320	4320	3448	4320			MSJ
2016-09-30	12:20:00	4310	4330	4330	3456	4330			MSJ
2016-10-01	12:00:00	4320	4340	4340	3464	4340			MSJ
2016-10-02	12:20:00	4330	4350	4350	3472	4350			MSJ
2016-10-03	12:15:00	4340	4360	4360	3480	4360			CWB
2016-10-04	12:40:00	4350	4370	4370	3488	4370	Y		MSJ
2016-10-05	12:30:00	4360	4380	4380	3496	4380			CWB		No
2016-10-06	12:22:00	4370	4390	4390	3504	4390			CWB		No
2016-10-07	12:20:00	4380	4400	4400	3512	4400			CWB		No
2016-10-08	12:05:00	4390	4410	4410	3520	4410			CWB		No
2016-10-09	13:07:00	4400	4420	4420	3528	4420			CWB		No	New SC filter sterilized instead of autoclaved
2016-10-10	12:43:00	4410	4430	4430	3536	4430			CWB		No
2016-10-11	12:26:00	4420	4440	4440	3544	4440	Y		CWB		No	Ran out of 75% Glyc, used 80% Glyc
2016-10-12	12:25:00	4430	4450	4450	3552	4450			CWB		No	Splashed lids, but probably no problem
2016-10-13								Y	ANNB			Unfroze from gen 4340 archive
2016-10-14	?	4360	4380	4380	3496	4380			ANNB
2016-10-15	?	4370	4390	4390	3504	4390			ANNB
2016-10-16	?	4380	4400	4400	3512	4400			ANNB
2016-10-17	?	4390	4410	4410	3520	4410			ANNB
2016-10-18	?	4400	4420	4420	3528	4420	Y		ANNB
2016-10-19	?	4410	4430	4430	3536	4430			MSJ
2016-10-20	13:15:00	4420	4440	4440	3544	4440			MSJ
2016-10-21	13:00:00	4430	4450	4450	3552	4450			MSJ
2016-10-22	13:10:00	4440	4460	4460	3560	4460			MSJ
2016-10-23	12:50:00	4450	4470	4470	3568	4470			MSJ
2016-10-24	13:08:00	4460	4480	4480	3576	4480			MSJ
2016-10-25	12:54:00	4470	4490	4490	3584	4490	Y		MSJ
2016-10-26	13:09:00	4480	4500	4500	3592	4500			CWB
2016-10-27	12:58:00	4490	4510	4510	3600	4510			CWB
2016-10-28	13:10:00	4500	4520	4520	3608	4520			CWB
2016-10-29	13:10:00	4510	4530	4530	3616	4530			CWB
2016-10-30	13:20:00	4520	4540	4540	3624	4540			ANNB
2016-10-31	12:55:00	4530	4550	4550	3632	4550			CWB
2016-11-01	12:30:00	4540	4560	4560	3640	4560			CWB
2016-11-02		4550	4570	4570	3648	4570			MSJ			Manually froze 4 96 well plates because biomek was broken (these plates are not in the -80C now)
2016-11-06								Y	?
2016-11-08	?	4560	4580	4580	3656	4580			?			Possible cross-contam?
2016-11-09	?	4570	4590	4590	3664	4590			?
2016-11-10	?	4580	4600	4600	3672	4600			?
2016-11-11	?	4590	4610	4610	3680	4610			?
2016-11-14	?	4600	4620	4620	3688	4620	?		?			Plates in 4C over the weekend
2016-11-15	13:10:00	4610	4630	4630	3696	4630			MSJ
2016-11-16	13:25:00	4620	4640	4640	3704	4640			MSJ
2016-11-17	13:25:00	4630	4650	4650	3712	4650			MSJ
2016-11-18	13:30:00	4640	4660	4660	3720	4660			MSJ
2016-11-19	13:30:00	4650	4670	4670	3728	4670			MSJ
2016-11-20	13:48:00	4660	4680	4680	3736	4680			CWB
2016-11-21	14:10:00	4670	4690	4690	3744	4690			CWB
2016-11-22	13:50:00	4680	4700	4700	3752	4700	Y		CWB
2016-11-23	?	4690	4710	4710	3760	4710			ANNB
2016-11-24	?	4700	4720	4720	3768	4720			ANNB
2016-11-25	?	4710	4730	4730	3776	4730			ANNB
2016-11-26	?	4720	4740	4740	3784	4740			ANNB
2016-11-27	?	4730	4750	4750	3792	4750			ANNB
2016-11-28	13:01:00	4740	4760	4760	3800	4760			CWB
2016-11-29	12:35:00	4750	4770	4770	3808	4770			CWB
2016-11-30	11:55:00	4760	4780	4780	3816	4780	Y		CWB			Contam in P1_G3, reverting to 4740 starting tomorrow
2016-12-01	13:45:00	4750	4770	4770	3808	4770			CWB			Using 4740 plates, which were at room temp 24 hours, then 4C 24 hours
2016-12-02	?	4760	4780	4780	3816	4780			ANNB
2016-12-03	?	4770	4790	4790	3824	4790			?
2016-12-04	?	4780	4800	4800	3832	4800			?
2016-12-05	?	4790	4810	4810	3840	4810			?
2016-12-06	?	4800	4820	4820	3848	4820			?
2016-12-07	12:45:00	4810	4830	4830	3856	4830	Y		?			Minor mishap - had to replace SM + P2 and P3
2016-12-08	13:00:00	4820	4840	4840	3864	4840			?
2016-12-09	13:20:00	4830	4850	4850	3872	4850			?
2016-12-10	14:12:00	4840	4860	4860	3880	4860			?
2016-12-11	14:00:00	4850	4870	4870	3888	4870			?
2016-12-12	14:36:00	4860	4880	4880	3896	4880			?
2016-12-13	14:07:00	4870	4890	4890	3904	4890	Y		?
2016-12-14	?	4880	4900	4900	3912	4900			?
2016-12-15	?	4890	4910	4910	3920	4910			?
2016-12-16	21:00:00	4900	4920	4920	3928	4920			?			Late transfer
2016-12-18	?	4910	4930	4930	3936	4930			?			Skipped the 17th because cells weren't grown up in time
2016-12-19	?	4910	4930	4930	3936	4930			?			x-contam found in P4, using previous days' plates
2016-12-20	13:10:00	4920	4940	4940	3944	4940			?
2016-12-21	13:18:00	4930	4950	4950	3952	4950			?
2016-12-22	13:30:00	4940	4960	4960	3960	4960	Y		?
2017-01-25								Y	PTH
2017-01-26	13:45:00	4950	4970	4970	3968	4970			PTH			Entire row A of P3 is empty now, not sure when it happened. P3_A1,P3_A2,P3_A3,P3_A4,P3_A5,P3_A6,P3_A7,P3_A8,P3_A9,P3_A10,P3_A11,P3_A12
2017-01-27	14:00:00	4960	4980	4980	3976	4980			PTH
2017-01-28	14:00:00	4970	4990	4990	3984	4990			PTH
2017-01-29	13:45:00	4980	5000	5000	3992	5000			PTH
2017-01-30	14:20:00	4990	5010	5010	4000	5010			PTH
2017-01-31	?	5000	5020	5020	4008	5020			PTH
2017-02-01	?	5010	5030	5030	4016	5030	Y		PTH			Freeze used 50% glycerol instead of 75%
2017-02-02	13:30:00	5020	5040	5040	4024	5040			MSJ		No
2017-02-03	14:00:00	5030	5050	5050	4032	5050			MSJ		No
2017-02-04	14:10:00	5040	5060	5060	4040	5060			MSJ		No	P1_H4 is contaminated
2017-02-05	13:55:00	5050	5070	5070	4048	5070			MSJ		No	Determined that P1_H4 got contaminated by glabrata sometime between 2/1/17 and now
2017-02-07	13:00:00							Y	MSJ			Unfreezing from gen 5000 (2/1/17), new tips
2017-02-08	?	5020	5040	5040	4024	5040			ANNB
2017-02-09	?	5030	5050	5050	4032	5050			ANNB			Suspicious that P1_D2,P1_A4,P1_B9,P1_D11 are contaminated
2017-02-10	?	5040	5060	5060	4040	5060			ANNB
2017-02-11	?	5050	5070	5070	4048	5070			ANNB
2017-02-12	?	5060	5080	5080	4056	5080			ANNB
2017-02-13	?	5070	5090	5090	4064	5090			ANNB
2017-02-14	?	5080	5100	5100	4072	5100	Y		ANNB
2017-02-15	13:40:00	5090	5110	5110	4080	5110			CWB
2017-02-16	13:50:00	5100	5120	5120	4088	5120			CWB
2017-02-17	13:50:00	5110	5130	5130	4096	5130			CWB
2017-02-18	13:40:00	5120	5140	5140	4104	5140			CWB
2017-02-19	13:37:00	5130	5150	5150	4112	5150			CWB
2017-02-20	14:00:00	5140	5160	5160	4120	5160			CWB
2017-02-21	14:00:00	5150	5170	5170	4128	5170	Y		CWB	Y
2017-02-22	14:40:00	5160	5180	5180	4136	5180			PTH
2017-02-23	15:15:00	5170	5190	5190	4144	5190			PTH
2017-02-24	14:45:00	5180	5200	5200	4152	5200			PTH			P4_F7 looks denser than the rest of the row, but apparently its ok
2017-02-25	15:10:00	5190	5210	5210	4160	5210			PTH
2017-02-26	15:15:00	5200	5220	5220	4168	5220			PTH
2017-02-27	15:15:00	5210	5230	5230	4176	5230			PTH
2017-02-28	15:15:00	5220	5240	5240	4184	5240	Y		PTH
2017-03-01	15:45:00	5230	5250	5250	4192	5250			MSJ
2017-03-02	15:30:00	5240	5260	5260	4200	5260			MSJ
2017-03-03	15:25:00	5250	5270	5270	4208	5270			MSJ
2017-03-04	15:19:00	5260	5280	5280	4216	5280			MSJ
2017-03-05	15:00:00	5270	5290	5290	4224	5290			MSJ
2017-03-06	15:10:00	5280	5300	5300	4232	5300			MSJ			New blank in P3_G2, so I transferred 1 ul from previous day's plate - so P3_G2 is ~11 gens behind technically
2017-03-07	14:50:00	5290	5310	5310	4240	5310	Y		MSJ
2017-03-08	14:00:00	5300	5320	5320	4248	5320			ANNB
2017-03-09	13:45:00	5310	5330	5330	4256	5330			ANNB
2017-03-10	13:30:00	5320	5340	5340	4264	5340			ANNB
2017-03-11	13:30:00	5330	5350	5350	4272	5350			ANNB
2017-03-12	13:30:00	5340	5360	5360	4280	5360			ANNB			Daylight savings time, so it was a 23hr transfer
2017-03-13	13:00:00	5350	5370	5370	4288	5370			ANNB
2017-03-14	13:00:00	5360	5380	5380	4296	5380	Y		ANNB
2017-03-15	13:28:00	5370	5390	5390	4304	5390			CWB
2017-03-16	14:00:00	5380	5400	5400	4312	5400			CWB
2017-03-17	13:40:00	5390	5410	5410	4320	5410			CWB
2017-03-18	13:30:00	5400	5420	5420	4328	5420			CWB
2017-03-19	13:50:00	5410	5430	5430	4336	5430			CWB
2017-03-20	14:10:00	5420	5440	5440	4344	5440			CWB
2017-03-21	14:40:00	5430	5450	5450	4352	5450	Y		CWB
2017-03-22	14:15:00	5440	5460	5460	4360	5460			CWB
2017-03-23	14:30:00	5450	5470	5470	4368	5470			PTH
2017-03-24	15:05:00	5460	5480	5480	4376	5480			CWB
2017-03-25	15:15:00	5470	5490	5490	4384	5490			PTH
2017-03-26	15:30:00	5480	5500	5500	4392	5500			PTH
2017-03-27	15:30:00	5490	5510	5510	4400	5510			PTH			Used filter sterilized SC
2017-03-28	15:30:00	5500	5520	5520	4408	5520	Y		PTH
2017-03-29	15:05:00	5510	5530	5530	4416	5530			MSJ			P4_G1 bottlenecked to very few cells, so I spiked in 1 ul from the previous day (so it is technically around 13 gens behind)
2017-03-30	14:55:00	5520	5540	5540	4424	5540			MSJ
2017-03-31	14:20:00	5530	5550	5550	4432	5550			MSJ
2017-04-01	14:55:00	5540	5550	5560	4440	5560			MSJ			Splashed the lid on P1 pretty bad. Transferred from the previous days' P1 plate
2017-04-02	14:50:00	5550	5560	5570	4448	5570			MSJ
2017-04-03	14:45:00	5560	5570	5580	4456	5580			MSJ
2017-04-04	14:35:00	5570	5580	5590	4464	5590	Y		MSJ
2017-04-05	14:00:00	5580	5590	5600	4472	5600			ANNB
2017-04-06	14:00:00	5590	5600	5610	4480	5610			ANNB			B1 tip fell during filling, may cause new blanks
2017-04-07	14:00:00	5600	5610	5620	4488	5620			ANNB
2017-04-08	14:00:00	5610	5620	5630	4496	5630			ANNB
2017-04-09	13:30:00	5620	5630	5640	4504	5640			ANNB
2017-04-10	13:30:00	5630	5640	5650	4512	5650			ANNB
2017-04-11	13:30:00	5640	5650	5660	4520	5660	Y		ANNB
2017-04-12	13:30:00	5650	5660	5670	4528	5670			CWB		No
2017-04-13	15:10:00	5650	5660	5670	4528	5670			CWB			Went back one day, with new p20 tip boxes. Found rampant candida? contamination in most but not all P1 and P4 wells, so transferred from the day old plates
2017-04-14	17:10:00	5660	5670	5680	4536	5680			CWB
2017-04-15	16:55:00	5670	5680	5690	4544	5690			CWB
2017-04-16	16:30:00	5680	5690	5700	4552	5700			CWB
2017-04-17	16:15:00	5690	5700	5710	4560	5710			CWB
2017-04-18	15:00:00	5700	5710	5720	4568	5720	Y		CWB
2017-04-19	15:15:00	5710	5720	5730	4576	5730			PTH			New tip boxes
2017-04-20	13:30:00	5720	5730	5740	4584	5740			ANNB
2017-04-21	13:30:00	5730	5740	5750	4592	5750			ANNB
2017-04-22	13:30:00	5740	5750	5760	4600	5760			ANNB
2017-04-23	13:15:00	5750	5760	5770	4608	5770			ANNB
2017-04-24	13:30:00	5760	5770	5780	4616	5780			ANNB
2017-04-25	13:30:00	5770	5780	5790	4624	5790	Y		ANNB
2017-04-26	13:39:00	5780	5790	5800	4632	5800			MSJ
2017-04-27	13:30:00	5790	5800	5810	4640	5810			MSJ
2017-04-28	13:25:00	5800	5810	5820	4648	5820			MSJ
2017-04-29	13:10:00	5810	5820	5830	4656	5830			MSJ
2017-04-30	13:05:00	5820	5830	5840	4664	5840			MSJ
2017-05-01	13:10:00	5830	5840	5850	4672	5850			MSJ
2017-05-02	13:23:00	5840	5850	5860	4680	5860	Y		MSJ
2017-05-03	14:30:00	5850	5860	5870	4688	5870			PTH			Looks like P4 row E has some contamination maybe?
2017-05-04	13:45:00	5860	5870	5880	4696	5880			PTH
2017-05-05	13:40:00	5870	5880	5890	4704	5890			PTH
2017-05-06	14:15:00	5880	5890	5900	4712	5900			PTH
2017-05-07	14:30:00	5890	5900	5910	4720	5910			PTH
2017-05-08	14:40:00	5900	5910	5920	4728	5920			PTH
2017-05-09	14:45:00	5910	5920	5930	4736	5930	Y		PTH
2017-05-10	14:10:00	5920	5930	5940	4744	5940			CWB
2017-05-11	13:45:00	5930	5940	5950	4752	5950			CWB
2017-05-12	13:37:00	5940	5950	5960	4760	5960			CWB
2017-05-13	13:15:00	5950	5960	5970	4768	5970			CWB
2017-05-14	13:45:00	5960	5970	5980	4776	5980			CWB
2017-05-15	13:30:00	5970	5980	5990	4784	5990			MSJ
2017-05-16	13:50:00	5980	5990	6000	4792	6000	Y		MSJ			Freezing in 96-well plates bc everyone is gone for the weekend
2017-06-07	14:00:00							Y	ANNB
2017-06-08	13:30:00	5990	6000	6010	4800	6010			ANNB
2017-06-09	13:15:00	6000	6010	6020	4808	6020			ANNB
2017-06-10	13:30:00	6010	6020	6030	4816	6030			ANNB
2017-06-11	13:30:00	6020	6030	6040	4824	6040			ANNB
2017-06-12	13:30:00	6030	6040	6050	4832	6050			ANNB
2017-06-13	?	6040	6050	6060	4840	6060	Y		ANNB
2017-06-14	13:30:00	6050	6060	6070	4848	6070			MSJ
2017-06-15	13:30:00	6060	6070	6080	4856	6080			MSJ
2017-06-16	13:26:00	6070	6080	6090	4864	6090			MSJ
2017-06-17	13:28:00	6080	6090	6100	4872	6100			MSJ
2017-06-18	13:38:00	6090	6100	6110	4880	6110			MSJ
2017-06-19	13:35:00	6100	6110	6120	4888	6120			MSJ
2017-06-20	13:35:00	6110	6120	6130	4896	6130	Y		MSJ
2017-06-21	14:00:00	6120	6130	6140	4904	6140			PTH
2017-06-22	17:00:00	6130	6140	6150	4912	6150			PTH
2017-06-23	15:45:00	6140	6150	6160	4920	6160			PTH
2017-06-24	15:30:00	6150	6160	6170	4928	6170			PTH
2017-06-25	15:20:00	6160	6170	6180	4936	6180			MSJ
2017-06-26	14:45:00	6170	6180	6190	4944	6190			PTH
2017-06-27	15:50:00	6180	6190	6200	4952	6200	Y		MSJ
2017-06-28	15:20:00	6190	6200	6210	4960	6210			MSJ
2017-06-29	15:08:00	6200	6210	6220	4968	6220			MSJ
2017-06-30	14:30:00	6210	6220	6230	4976	6230			MSJ
2017-07-01	14:17:00	6220	6230	6240	4984	6240			MSJ
2017-07-02	13:55:00	6230	6240	6250	4992	6250			MSJ			Transferred some of P3 by hand because evaporation + warped plate made the tips miss some of the wells
2017-07-03	13:45:00	6240	6250	6260	5000	6260			MSJ
2017-07-04	13:30:00	6250	6260	6270	5008	6270	Y		MSJ
2017-07-05	13:12:00	6260	6270	6280	5016	6280			CWB
2017-07-06	14:32:00	6270	6280	6290	5024	6290			CWB
2017-07-07	13:47:00	6280	6290	6300	5032	6300			CWB
2017-07-08	13:17:00	6290	6300	6310	5040	6310			CWB
2017-07-09	14:45:00	6300	6310	6320	5048	6320			CWB
2017-07-10	14:45:00	6310	6320	6330	5056	6330			CWB
2017-07-11	14:15:00	6320	6330	6340	5064	6340			CWB
2017-07-12	14:15:00	6330	6340	6350	5072	6350	Y		KL+CWB
2017-07-13	13:45:00	6340	6350	6360	5080	6360			KL+CWB
2017-07-14	14:00:00	6350	6360	6370	5088	6370			KL+CWB
2017-07-15	14:00:00	6360	6370	6380	5096	6380			KL+ANNB		No
2017-07-16	14:15:00	6360	6370	6380	5096	6380			KL+ANNB			Dropped P2, inoculating from previous day's plates
2017-07-17	14:00:00	6370	6380	6390	5104	6390			KL+ANNB
2017-07-18	14:00:00	6380	6390	6400	5112	6400	Y		KL+ANNB
2017-07-19	14:00:00	6390	6400	6410	5120	6410			KL
2017-07-20	13:50:00	6400	6410	6420	5128	6420			KL
2017-07-21	13:55:00	6410	6420	6430	5136	6430			KL
2017-07-22	13:35:00	6420	6430	6440	5144	6440			KL
2017-07-23	13:30:00	6430	6440	6450	5152	6450			KL
2017-07-24	13:20:00	6440	6450	6460	5160	6460			KL
2017-07-25	13:35:00	6450	6460	6470	5168	6470	Y		KL
2017-07-26	13:45:00	6460	6470	6480	5176	6480			CWB			Droplets on P4 lid, but seems all ok
2017-07-27	14:07:00	6470	6480	6490	5184	6490			CWB
2017-07-28	13:52:00	6480	6490	6500	5192	6500			CWB
2017-07-29	13:52:00	6490	6500	6510	5200	6510			CWB
2017-07-30	14:00:00	6500	6510	6520	5208	6520			CWB
2017-07-31	14:15:00	6510	6520	6530	5216	6530			CWB
2017-08-01	14:10:00	6520	6530	6540	5224	6540	Y		CWB
2017-08-02	13:55:00	6530	6540	6550	5232	6550			KL
2017-08-03	14:00:00	6540	6550	6560	5240	6560			KL
2017-08-04	14:00:00	6550	6560	6570	5248	6570			KL
2017-08-05	13:50:00	6560	6570	6580	5256	6580			KL
2017-08-06	13:55:00	6570	6580	6590	5264	6590			KL
2017-08-07	13:55:00	6580	6590	6600	5272	6600			KL
2017-08-08	14:00:00	6590	6600	6610	5280	6610	Y		KL
2017-08-09	15:15:00	6600	6610	6620	5288	6620			ANNB
2017-08-10	14:45:00	6610	6620	6630	5296	6630			ANNB
2017-08-11	14:30:00	6620	6630	6640	5304	6640			ANNB
2017-08-12	14:30:00	6630	6640	6650	5312	6650			ANNB
2017-08-13	14:00:00	6640	6650	6660	5320	6660			ANNB
2017-08-14	14:00:00	6650	6660	6670	5328	6670			ANNB
2017-08-15	14:00:00	6660	6670	6680	5336	6680	Y		ANNB
2017-08-16	14:30:00	6670	6680	6690	5344	6690			PTH			Shaker set to max by accident, seems ok though
2017-08-17	16:00:00	6680	6690	6700	5352	6700			PTH
2017-08-18	15:15:00	6690	6700	6710	5360	6710			PTH
2017-08-19	15:15:00	6700	6710	6720	5368	6720			MSJ
2017-08-20	15:50:00	6710	6720	6730	5376	6730			PTH
2017-08-21	16:25:00	6720	6730	6740	5384	6740			MSJ
2017-08-22	15:50:00	6730	6740	6750	5392	6750	Y		MSJ
2017-08-23	16:00:00	6740	6750	6760	5400	6760			PTH
2017-08-24	15:45:00	6750	6760	6770	5408	6770			PTH			x-contam observed in P1 and P4. New 20 ul tips on order. Going to unfreeze from 8/22/17 stock
2017-10-11	15:00:00							Y	?			Unfreezing from 8/22/17 stock
2017-10-12	14:00:00	6740	6750	6760	5400	6760			KL
2017-10-13	13:50:00	6750	6760	6770	5408	6770			KL
2017-10-14	14:00:00	6760	6770	6780	5416	6780			KL
2017-10-15	14:00:00	6770	6780	6790	5424	6790			KL
2017-10-16	13:55:00	6780	6790	6800	5432	6800			KL
2017-10-17	14:15:00	6790	6800	6810	5440	6810	Y		KL
2017-10-18	13:50:00	6800	6810	6820	5448	6820			ANNB		No
2017-10-19	14:00:00	6810	6820	6830	5456	6830			ANNB		No
2017-10-20	14:00:00	6820	6830	6840	5464	6840			ANNB		No
2017-10-21	14:00:00	6830	6840	6850	5472	6850			ANNB		No
2017-10-22	14:00:00	6840	6850	6860	5480	6860			ANNB		No
2017-10-23	14:00:00	6850	6860	6870	5488	6870			ANNB		No
2017-10-24	13:45:00	6860	6870	6880	5496	6880	Y		ANNB		No
2017-10-25	14:30:00	6870	6880	6890	5504	6890			PTH		No
2017-10-26	14:45:00	6880	6890	6900	5512	6900			PTH		No	P4_G7 looks spotty and weird
2017-10-27	17:00:00	6890	6900	6910	5520	6910			PTH		No
2017-10-28	15:00:00	6900	6910	6920	5528	6920			PTH		No
2017-10-29	14:30:00	6910	6920	6930	5536	6930			PTH		No
2017-10-30	14:30:00	6920	6930	6940	5544	6940			PTH		No
2017-10-31	14:45:00	6930	6940	6950	5552	6950	Y		PTH		No
2017-11-01	15:00:00	6940	6950	6960	5560	6960			RP		No
2017-11-02	14:30:00	6950	6960	6970	5568	6970			RP		No
2017-11-03	13:40:00	6960	6970	6980	5576	6980			RP		No	Major bacterial contamination in P4 that goes back at least a few weeks. 6780 (10/17/19) plate appears to be before contam
2017-11-07	14:40:00							Y	RP			Unfreezing from 10/17/19 stock
2017-11-08	16:20:00	6800	6810	6820	5448	6820			CWB
2017-11-09	15:20:00	6810	6820	6830	5456	6830			CWB
2017-11-10	15:40:00	6820	6830	6840	5464	6840			CWB
2017-11-11	15:40:00	6830	6840	6850	5472	6850			CWB
2017-11-12	15:35:00	6840	6850	6860	5480	6860			CWB
2017-11-13	16:35:00	6850	6860	6870	5488	6870			CWB
2017-11-14	16:40:00	6860	6870	6880	5496	6880			CWB
2017-11-15	16:25:00	6870	6880	6890	5504	6890			CWB
2017-11-16	?	6880	6890	6900	5512	6900	Y		CWB			Froze in 96-well plates
2017-11-22	15:00:00								MSJ			Unfreezing
2017-11-23	14:55:00	6890	6900	6910	5520	6910			MSJ		No
2017-11-24	15:25:00							Y	MSJ			yeast contam in P3, F6,H7,A2, unfreezing from 11/16/17 stock again
2017-11-25	13:50:00	6890	6900	6910	5520	6910			MSJ
2017-11-26	14:00:00	6900	6910	6920	5528	6920			MSJ
2017-11-27	13:40:00	6910	6920	6930	5536	6930			CWB
2017-11-28	13:30:00	6920	6930	6940	5544	6940	Y		MSJ
2017-11-29	13:30:00	6930	6940	6950	5552	6950			ANNB
2017-11-30	13:30:00	6940	6950	6960	5560	6960			ANNB
2017-12-01	13:30:00	6950	6960	6970	5568	6970			ANNB
2017-12-02	13:30:00	6960	6970	6980	5576	6980			KL
2017-12-03	13:30:00	6970	6980	6990	5584	6990			ANNB
2017-12-04	13:30:00	6980	6990	7000	5592	7000			ANNB
2017-12-05	14:00:00	6990	7000	7010	5600	7010	Y		ANNB
2017-12-06	14:30:00	7000	7010	7020	5608	7020			KL		No
2017-12-07	14:20:00	7010	7020	7030	5616	7030			KL		No
2017-12-08	13:45:00	7020	7030	7040	5624	7040			KL		No
2017-12-09	13:45:00	7030	7040	7050	5632	7050			KL		No
2017-12-10	14:00:00	7040	7050	7060	5640	7060			KL		No
2017-12-11	13:45:00	7050	7060	7070	5648	7070			KL		No
2017-12-12	14:00:00	7060	7070	7080	5656	7080	Y		KL		No
2017-12-13	14:00:00	7070	7080	7090	5664	7090			CWB		No
2017-12-14	14:15:00	7080	7090	7100	5672	7100			CWB		No
2017-12-15	14:25:00	7090	7100	7110	5680	7110			CWB		No
2017-12-16	14:10:00	7100	7110	7120	5688	7120			CWB		No
2017-12-17	14:10:00	7110	7120	7130	5696	7130			CWB		No	P3_H3,P3_H4,P3_H5,P3_H11 now blank
2017-12-18	14:25:00	7120	7130	7140	5704	7140			CWB		No
2017-12-19	14:30:00	7130	7140	7150	5712	7150			CWB		No
2017-12-20	14:15:00	7140	7150	7160	5720	7160			CWB		No
2017-12-21	14:20:00	7150	7160	7170	5728	7170			CWB		No
2017-12-22	15:00:00	7160	7170	7180	5736	7180	Y		CWB		No	Freeze in 96-well plates
2018-01-03	16:00:00							Y	MSJ		No
2018-01-04	14:45:00	7170	7180	7190	5744	7190			MSJ		No
2018-01-05	14:23:00	7180	7190	7200	5752	7200			MSJ		No	P4_G7 looks bottlenecked, Realized that some blanks in P4 and P3 got filled in, sometime before 12/22/17, going to unfreeze from 12/1217 stock
2018-01-06	14:40:00							Y	MSJ		No	Unfreezing from 12/12/17 and new tips
2018-01-07	14:08:00	7070	7080	7090	5664	7090			MSJ		No
2018-01-08	14:05:00	7080	7090	7100	5672	7100			MSJ		No	P4_A2 was blank but has growth, going to need to unfreeze from earlier
2018-01-10	14:15:00							Y	KL			Unfreezing from 12/5/17 stock
2018-01-11	14:00:00	7000	7010	7020	5608	7020			KL			P1_E5 is not blank, which makes sense, because it wasn't blank before the unfreezing (but it did go blank after the unfreezing, not in the timeline)
2018-01-12	14:05:00	7010	7020	7030	5616	7030			KL
2018-01-13	14:00:00	7020	7030	7040	5624	7040			KL
2018-01-14	13:55:00	7030	7040	7050	5632	7050			KL
2018-01-15	14:00:00	7040	7050	7060	5640	7060			KL
2018-01-16	14:05:00	7050	7060	7070	5648	7070	Y		KL
2018-01-17	13:45:00	7060	7070	7080	5656	7080			ANNB
2018-01-18	14:00:00	7070	7080	7090	5664	7090			ANNB
2018-01-19	14:15:00	7080	7090	7100	5672	7100			ANNB
2018-01-20	14:15:00	7090	7100	7110	5680	7110			ANNB
2018-01-21	14:00:00	7100	7110	7120	5688	7120			ANNB
2018-01-22	13:45:00	7110	7120	7130	5696	7130			ANNB
2018-01-23	13:30:00	7120	7130	7140	5704	7140	Y		ANNB
2018-01-24	13:50:00	7130	7140	7150	5712	7150			RP
2018-01-25	13:40:00	7140	7150	7160	5720	7160			RP
2018-01-26	14:10:00	7150	7160	7170	5728	7170			CWB
2018-01-27	13:30:00	7160	7170	7180	5736	7180			RP
2018-01-28	13:42:00	7170	7180	7190	5744	7190			RP
2018-01-29	12:40:00	7180	7190	7200	5752	7200			RP
2018-01-30	14:20:00	7190	7200	7210	5760	7210	Y		RP			P4_E6,P4_F6 look bottlenecked to only a few colonies
2018-01-31	14:00:00	7200	7210	7220	5768	7220			MSJ
2018-02-01	13:53:00	7210	7220	7230	5776	7230			MSJ
2018-02-02	13:53:00	7220	7230	7240	5784	7240			MSJ
2018-02-03	14:02:00	7230	7240	7250	5792	7250			MSJ
2018-02-04	14:12:00	7240	7250	7260	5800	7260			MSJ
2018-02-05	14:10:00	7250	7260	7270	5808	7270			PTH
2018-02-06	15:40:00	7260	7270	7280	5816	7280	Y		PTH			Had to fill + transfer P4_D6,P4_E6 manually
2018-02-07	14:45:00	7270	7280	7290	5824	7290			CWB
2018-02-08	15:30:00	7280	7290	7300	5832	7300			CWB
2018-02-09	15:20:00	7290	7300	7310	5840	7310			CWB
2018-02-10	20:00:00	7300	7310	7320	5848	7320			CWB
2018-02-11	19:15:00	7310	7320	7330	5856	7330			CWB
2018-02-12	18:40:00	7320	7330	7340	5864	7340			CWB
2018-02-13	17:50:00	7330	7340	7350	5872	7350	Y		CWB
2018-02-14	17:45:00	7340	7350	7360	5880	7360			MSJ
2018-02-15	17:25:00	7350	7360	7370	5888	7370			MSJ
2018-02-16	17:10:00	7360	7370	7380	5896	7380			MSJ
2018-02-17	17:05:00	7370	7380	7390	5904	7390			MSJ
2018-02-18	16:58:00	7380	7390	7400	5912	7400			MSJ
2018-02-19	16:25:00	7390	7400	7410	5920	7410			MSJ
2018-02-20	16:08:00	7400	7410	7420	5928	7420	Y		MSJ
2018-02-21	16:07:00	7410	7420	7430	5936	7430			ANNB
2018-02-22	15:15:00	7420	7430	7440	5944	7440			ANNB
2018-02-23	14:30:00	7430	7440	7450	5952	7450			ANNB
2018-02-24	15:00:00	7440	7450	7460	5960	7460			ANNB
2018-02-25	15:30:00	7450	7460	7470	5968	7470			ANNB
2018-02-26	15:30:00	7460	7470	7480	5976	7480			ANNB
2018-02-27	15:30:00	7470	7480	7490	5984	7490	Y		ANNB
2018-02-28	14:45:00	7480	7490	7500	5992	7500			KL
2018-03-01	14:30:00	7490	7500	7510	6000	7510			KL
2018-03-02	14:15:00	7500	7510	7520	6008	7520			KL
2018-03-03	14:00:00	7510	7520	7530	6016	7530			KL
2018-03-04	13:45:00	7520	7530	7540	6024	7540			KL
2018-03-05	13:45:00	7530	7540	7550	6032	7550			KL
2018-03-06	13:55:00	7540	7550	7560	6040	7560	Y		KL	Y
2018-03-07	14:40:00	7550	7560	7570	6048	7570			RP
2018-03-08	14:20:00	7560	7570	7580	6056	7580			RP
2018-03-09	14:30:00	7570	7580	7590	6064	7590			RP
2018-03-10	14:15:00	7580	7590	7600	6072	7600			RP
2018-03-11	14:23:00	7590	7600	7610	6080	7610			RP
2018-03-12	13:45:00	7600	7610	7620	6088	7620			RP
2018-03-13	14:02:00	7610	7620	7630	6096	7630	Y		RP
2018-03-14	13:58:00	7620	7630	7640	6104	7640			CWB			Lost population in P1_E6
2018-03-15	14:15:00	7630	7640	7650	6112	7650			CWB
2018-03-16	13:58:00	7640	7650	7660	6120	7660			CWB
2018-03-17	14:00:00	7650	7660	7670	6128	7670			ANNB
2018-03-18	14:55:00	7660	7670	7680	6136	7680			CWB
2018-03-19	14:30:00	7670	7680	7690	6144	7690			CWB
2018-03-20	15:15:00	7680	7690	7700	6152	7700	Y		CWB
2018-03-21	14:55:00	7690	7700	7710	6160	7710			ARC		No
2018-03-22	14:55:00	7700	7710	7720	6168	7720			ARC		No
2018-03-23	15:05:00	7710	7720	7730	6176	7730			ARC		No
2018-03-24	15:20:00	7720	7730	7740	6184	7740			ARC		No
2018-03-25	14:55:00	7730	7740	7750	6192	7750			ARC		No
2018-03-26	14:20:00	7740	7750	7760	6200	7760			ARC		No
2018-03-27	14:05:00	7750	7760	7770	6208	7770	Y		ARC		No	Plates are contaminated by yeast, caused by contaminated SC
2018-03-29	13:15:00							Y	MSJ			Unfreezing from 3/20/18
2018-03-30	13:19:00	7690	7700	7710	6160	7710			MSJ
2018-03-31	13:12:00	7700	7710	7720	6168	7720			MSJ
2018-04-01	13:30:00	7710	7720	7730	6176	7730			MSJ
2018-04-02	13:18:00	7720	7730	7740	6184	7740			MSJ
2018-04-03	13:17:00	7730	7740	7750	6192	7750	Y		MSJ
2018-04-04	13:45:00	7740	7750	7760	6200	7760			KL
2018-04-05	14:00:00	7750	7760	7770	6208	7770			KL
2018-04-06	14:05:00	7760	7770	7780	6216	7780			KL
2018-04-07	13:55:00	7770	7780	7790	6224	7790			KL
2018-04-08	13:45:00	7780	7790	7800	6232	7800			KL
2018-04-09	14:00:00	7790	7800	7810	6240	7810			ANNB
2018-04-10	14:15:00	7800	7810	7820	6248	7820	Y		ARC			Edited xfer_freeze protocol - before this the freeze protocol was a 2^9 dilution for P1,P2,&P4 (compared to 2^10 for a normal transfer, which is what the freeze protocol also does now). P3 has always been a 2^8 dilution, in all cases.
2018-04-11	14:00:00	7810	7820	7830	6256	7830			ANNB
2018-04-12	14:00:00	7820	7830	7840	6264	7840			ANNB
2018-04-13	14:00:00	7830	7840	7850	6272	7850			ANNB
2018-04-14	13:50:00	7840	7850	7860	6280	7860			KL
2018-04-15	13:50:00	7850	7860	7870	6288	7870			ANNB
2018-04-16	15:50:00	7860	7870	7880	6296	7880			ANNB
2018-04-17	14:00:00	7870	7880	7890	6304	7890	Y		ANNB
2018-04-18	13:42:00	7880	7890	7900	6312	7900			RP
2018-04-19	14:09:00	7890	7900	7910	6320	7910			RP
2018-04-20	14:30:00	7900	7910	7920	6328	7920			RP
2018-04-21	14:00:00	7910	7920	7930	6336	7930			RP
2018-04-22	13:35:00	7920	7930	7940	6344	7940			RP
2018-04-23	14:30:00	7930	7940	7950	6352	7950			RP
2018-04-24	14:00:00	7940	7950	7960	6360	7960	Y		RP
2018-04-25	13:45:00	7950	7960	7970	6368	7970			CWB
2018-04-26	13:35:00	7960	7970	7980	6376	7980			CWB
2018-04-27	14:10:00	7970	7980	7990	6384	7990			CWB
2018-04-28	14:05:00	7980	7990	8000	6392	8000			CWB
2018-04-29	13:45:00	7990	8000	8010	6400	8010			CWB
2018-04-30	14:10:00	8000	8010	8020	6408	8020			CWB
2018-05-01	14:15:00	8010	8020	8030	6416	8030	Y		CWB
2018-05-02	14:20:00	8020	8030	8040	6424	8040			ARC
2018-05-03	14:40:00	8030	8040	8050	6432	8050			ARC			P1_E12 transferred by hand
2018-05-04	14:40:00	8040	8050	8060	6440	8060			ARC
2018-05-05	14:40:00	8050	8060	8070	6448	8070			ARC
2018-05-06	15:15:00	8060	8070	8080	6456	8080			ARC
2018-05-07	15:00:00	8070	8080	8090	6464	8090			ARC			Precipitate or contam in SC bottle - filter sterilized it
2018-05-08	14:50:00	8080	8090	8100	6472	8100	Y		ARC
2018-05-09	14:50:00	8090	8100	8110	6480	8110			MSJ
2018-05-10	14:30:00	8100	8110	8120	6488	8120			MSJ
2018-05-11	14:15:00	8110	8120	8130	6496	8130			MSJ
2018-05-12	13:50:00	8120	8130	8140	6504	8140			MSJ
2018-05-13	13:50:00	8130	8140	8150	6512	8150			MSJ
2018-05-14	13:45:00	8140	8150	8160	6520	8160			MSJ
2018-05-15	13:30:00	8150	8160	8170	6528	8170	Y		MSJ
2018-05-16	13:50:00	8160	8170	8180	6536	8180			KL
2018-05-17	13:50:00	8170	8180	8190	6544	8190			KL
2018-05-18	14:10:00	8180	8190	8200	6552	8200			KL
2018-05-19	14:10:00	8190	8200	8210	6560	8210			KL
2018-05-20	14:05:00	8200	8210	8220	6568	8220			KL
2018-05-21	14:00:00	8210	8220	8230	6576	8230			KL
2018-05-22	14:00:00	8220	8230	8240	6584	8240	Y		KL
2018-05-23	13:00:00	8230	8240	8250	6592	8250			ANNB
2018-05-24	14:00:00	8240	8250	8260	6600	8260			ANNB
2018-05-25	14:00:00	8250	8260	8270	6608	8270			ANNB
2018-05-26	14:00:00	8260	8270	8280	6616	8280			ANNB
2018-05-27	14:00:00	8270	8280	8290	6624	8290			ANNB
2018-05-28	14:00:00	8280	8290	8300	6632	8300			ANNB
2018-05-29	14:00:00	8290	8300	8310	6640	8310	Y		ANNB
2018-05-30	16:15:00	8300	8310	8320	6648	8320			CWB
2018-05-31	15:45:00	8310	8320	8330	6656	8330			CWB
2018-06-01	15:45:00	8320	8330	8340	6664	8340			CWB
2018-06-02	15:15:00	8330	8340	8350	6672	8350			CWB
2018-06-03	14:45:00	8340	8350	8360	6680	8360			CWB
2018-06-04	14:40:00	8350	8360	8370	6688	8370			CWB
2018-06-05	14:35:00	8360	8370	8380	6696	8380	Y		CWB
2018-06-06	15:50:00	8370	8380	8390	6704	8390			RP
2018-06-07	14:50:00	8380	8390	8400	6712	8400			RP
2018-06-08	15:15:00	8390	8400	8410	6720	8410			RP
2018-06-09	14:15:00	8400	8410	8420	6728	8420			RP
2018-06-10	14:30:00	8410	8420	8430	6736	8430			RP
2018-06-12	14:26:00	8420	8430	8440	6744	8440			RP			Transfer was forgotten on 6/11/18, so plates spent 48hrs in incubators
2018-06-13	14:30:00	8430	8440	8450	6752	8450	Y		KL
2018-06-14	13:30:00	8440	8450	8460	6760	8460			KL
2018-06-15	13:00:00	8450	8460	8470	6768	8470			KL
2018-06-16	12:00:00	8460	8470	8480	6776	8480			KL
2018-06-17	13:00:00	8470	8480	8490	6784	8490			KL
2018-06-18	14:10:00	8480	8490	8500	6792	8500			KL
2018-06-19	14:05:00	8490	8500	8510	6800	8510	Y		KL
2018-06-20	13:30:00	8500	8510	8520	6808	8520			ANNB		No
2018-06-21	13:00:00	8510	8520	8530	6816	8530			ANNB		No
2018-06-22	14:00:00	8520	8530	8540	6824	8540			ANNB		No
2018-06-23	14:00:00	8530	8540	8550	6832	8550			ANNB		No
2018-06-24	13:00:00	8540	8550	8560	6840	8560			ANNB		No
2018-06-25	13:00:00	8550	8560	8570	6848	8570			ANNB		No
2018-06-26	13:00:00	8560	8570	8580	6856	8580	Y		ANNB		No
2018-06-27	13:00:00	8570	8580	8590	6864	8590			CWB+AP		No	3 new blanks in P1 row A, going to unfreeze from 6/19/18 stock
2018-06-28	14:15:00							Y	CWB+AP			Unfreezing from 6/19/18
2018-06-29	11:00:00	8490	8510	8520	6808	8520			CWB+AP			P3_H5 looks bottlenecked, P3_H1 is blank (maybe it has been for a while?)
2018-06-30	11:15:00	8500	8520	8530	6816	8530			CWB+AP			new P4 tips
2018-07-01	11:48:00	8510	8530	8540	6824	8540			CWB+AP
2018-07-02	12:30:00	8520	8540	8550	6832	8550			CWB+AP
2018-07-03	12:45:00	8530	8550	8560	6840	8560	Y		CWB+AP
2018-07-04	12:40:00	8540	8560	8570	6848	8570			RP
2018-07-05	14:15:00	8550	8570	8580	6856	8580			RP
2018-07-06	14:15:00	8560	8580	8590	6864	8590			RP
2018-07-07	14:40:00	8570	8590	8600	6872	8600			RP
2018-07-08	14:40:00	8580	8600	8610	6880	8610			RP
2018-07-09	14:30:00	8590	8610	8620	6888	8620			RP
2018-07-10	15:00:00	8600	8620	8630	6896	8630	Y		RP
2018-07-11	14:34:00	8610	8630	8640	6904	8640			CWB		Except P3
2018-07-12	15:10:00	8620	8640	8650	6912	8650			CWB		Except P3
2018-07-13	15:30:00	8630	8650	8660	6920	8660			CWB		Except P3	Lost row H in P3, then re-seeded from the 7/10/18 stock, so those wells are behind by 35 gens.
2018-07-14	15:00:00	8640	8660	8670	6928	8670			CWB		Except P3
2018-07-15	14:00:00	8650	8670	8680	6936	8680			AP		Except P3	P2_E1 looks bottlenecked
2018-07-16	14:35:00	8660	8680	8690	6944	8690			CWB		Except P3	P3 getting lots of blanks from evaporation issues
2018-07-17	14:35:00	8670	8690	8700	6952	8700	Y	Y (P3)	CWB		Except P3	Unfroze P3 from 7/10/18, froze P1, P2, P4
2018-07-18	14:35:00	8680	8700	8710	6904	8710			CWB
2018-07-19	14:45:00	8690	8710	8720	6912	8720			MSJ
2018-07-20	14:45:00	8700	8720	8730	6920	8730			MSJ
2018-07-21	14:48:00	8710	8730	8740	6928	8740			MSJ
2018-07-22	14:50:00	8720	8740	8750	6936	8750			MSJ
2018-07-23	15:05:00	8730	8750	8760	6944	8760			MSJ			Biomek was busy so plates spent an extra 15 min at room temp pre transfer
2018-07-24	14:55:00	8740	8760	8770	6952	8770	Y		MSJ			P3_H5 looks bottlenecked (not too bad)
2018-07-25	12:15:00	8750	8770	8780	6960	8780			ANNB
2018-07-26	13:15:00	8760	8780	8790	6968	8790			ANNB
2018-07-27	13:00:00	8770	8790	8800	6976	8800			ANNB
2018-07-28	13:00:00	8780	8800	8810	6984	8810			ANNB			P3 evaporating a lot, causing big bottlenecks
2018-07-29	12:45:00	8790	8810	8820	6992	8820			ANNB
2018-07-30	12:30:00	8800	8820	8830	7000	8830			ANNB
2018-07-31	12:30:00	8810	8830	8840	7008	8840	Y		ANNB
2018-08-01	13:30:00	8820	8840	8850	7016	8850			AP		No
2018-08-02	13:30:00	8830	8850	8860	7024	8860			AP		No
2018-08-03	13:30:00	8840	8860	8870	7032	8870			AP		No	P3 evaporation / bottlenecks continuing to be a problem, particularly in row G wells
2018-08-04	13:15:00	8850	8870	8880	7040	8880			CWB		No
2018-08-05	12:50:00	8860	8880	8890	7048	8890			AP		No	Rows A & B of P3 all blanks
2018-08-06	13:43:00	8870	8890	8900	7056	8900			AP		No
2018-08-07	14:15:00	8880	8900	8910	7064	8910	Y		AP		No
2018-08-08	14:30:00	8890	8910	8920	7072	8920			KL		No
2018-08-09	14:40:00	8900	8920	8930	7080	8930			KL		No
2018-08-10	15:15:00	8910	8930	8940	7088	8940			KL		No
2018-08-11	15:05:00	8920	8940	8950	7096	8950			KL		No	Bottlenecking in P3_H4, P3_H5
2018-08-12	14:40:00	8930	8950	8960	7104	8960			KL		No
2018-08-13	14:05:00	8940	8960	8970	7112	8970			KL		No
2018-08-14	14:10:00	8950	8970	8980	7120	8980	Y		KL		No
2018-08-15	15:15:00	8960	8980	8990	7128	8990			RP		No
2018-08-16	17:00:00								CWB		No	Bacterial contamination in the YPD blanks. Unfreezing from 8/14/18 stock.
2018-08-17	14:40:00	8960	8980	8990	7128	8990			RP		No
2018-08-18	13:55:00	8970	8990	9000	7136	9000			RP		No
2018-08-19	12:30:00	8980	9000	9010	7144	9010			RP		No
2018-08-20	13:45:00	8990	9010	9020	7152	9020			RP		No	Plates spent an extra ~20 mins at room temp pre transfer. P4_F2,P4_F6 look bottlenecked.
2018-08-21	13:40:00	9000	9020	9030	7160	9030	Y		RP		No
2018-08-22	17:40:00								ARC		No	Subtle contamination in blanks still, unfreezing from 8/7/18, new tips
2018-08-23	17:20:00	8890	8910	8920	7072	8920			ARC		No
2018-08-25	16:00:00							Y	ARC			Contamination still there, unfreezing from an additional week back (7/31/18 stock)
2018-08-26	15:00:00	8820	8840	8850	7016	8850			ARC			Had to pipet P3_H4 and P3_H5 by hand
2018-08-28	14:30:00	8830	8850	8860	7024	8860	Y		ANNB			Not sure what the deal is with the date hop here??
2018-08-29	14:55:00	8840	8860	8870	7032	8870			MSJ		No
2018-08-30	14:30:00	8850	8870	8880	7040	8880			MSJ		No	Yeast contam in P4_E6, going to unfreeze...
2018-08-31	14:00:00							Y	MSJ			Unfreezing from gen 8820 stock (8/28/18 stock)
2018-09-01	13:15:00	8840	8860	8870	7032	8870			MSJ
2018-09-02	13:30:00	8850	8870	8880	7040	8880			MSJ
2018-09-03	13:25:00	8860	8880	8890	7048	8890			MSJ
2018-09-04	13:33:00	8870	8890	8900	7056	8900	Y		MSJ
2018-09-05	13:30:00	8880	8900	8910	7064	8910			ANNB
2018-09-06	13:00:00	8890	8910	8920	7072	8920			ANNB
2018-09-07	12:30:00	8900	8920	8930	7080	8930			ANNB
2018-09-08	12:30:00	8910	8930	8940	7088	8940			ANNB
2018-09-09	13:00:00	8920	8940	8950	7096	8950			ANNB
2018-09-10	12:00:00	8930	8950	8960	7104	8960			ANNB
2018-09-11	14:00:00	8940	8960	8970	7112	8970	Y		ANNB
2018-09-12	13:15:00	8950	8970	8980	7120	8980			AP
2018-09-13	13:00:00	8960	8980	8990	7128	8990			AP
2018-09-14	12:42:00	8970	8990	9000	7136	9000			AP
2018-09-15	12:15:00	8980	9000	9010	7144	9010			AP
2018-09-16	11:45:00	8990	9010	9020	7152	9020			AP
2018-09-17	12:30:00	9000	9020	9030	7160	9030			AP
2018-09-18	13:20:00	9010	9030	9040	7168	9040	Y		AP
2018-09-19	14:20:00	9020	9040	9050	7176	9050			CWB
2018-09-20	14:00:00	9030	9050	9060	7184	9060			CWB		No
2018-09-21	14:00:00	9030	9050	9060	7184	9060			CWB			One of yesterday's fill tips didn't work, transferring from the previous day's plates that sat on the bench 24hrs
2018-09-22	14:00:00	9040	9060	9070	7192	9070			CWB			P3_B11,P3_E12,P3_F12 look bottlenecked to ~100 cells
2018-09-23	14:20:00	9050	9070	9080	7200	9080			CWB
2018-09-24	14:25:00	9060	9080	9090	7208	9090			CWB
2018-09-25	14:30:00	9070	9090	9100	7216	9100	Y		CWB
2018-09-26	14:45:00	9080	9100	9110	7224	9110			KL
2018-09-27	14:30:00	9090	9110	9120	7232	9120			KL
2018-09-28	14:30:00	9100	9120	9130	7240	9130			KL
2018-09-29	15:10:00	9110	9130	9140	7248	9140			KL
2018-09-30	15:10:00	9120	9140	9150	7256	9150			KL
2018-10-01	15:00:00	9130	9150	9160	7264	9160			KL
2018-10-02	14:30:00	9140	9160	9170	7272	9170	Y		KL			old YPD bottle got contaminated, plates ok, using temp YPD bottle
2018-10-03	14:30:00	9150	9170	9180	7280	9180			MSJ
2018-10-04	14:30:00	9160	9180	9190	7288	9190			MSJ
2018-10-05	14:30:00	9170	9190	9200	7296	9200			MSJ
2018-10-06	14:20:00	9180	9200	9210	7304	9210			MSJ
2018-10-07	14:35:00	9190	9210	9220	7312	9220			MSJ
2018-10-08	14:35:00	9200	9220	9230	7320	9230			MSJ			P4_H11 went blank, spiked in 0.5ul from the day before, so it is back ~12 generations
2018-10-09	14:35:00	9210	9230	9240	7328	9240	Y		MSJ			P2_A7 looks bottlenecked, but not too bad
2018-10-10	15:00:00	9220	9240	9250	7336	9250			ARC
2018-10-11	14:50:00	9230	9250	9260	7344	9260			ARC
2018-10-12	14:40:00	9240	9260	9270	7352	9270			ARC
2018-10-13	15:30:00	9250	9270	9280	7360	9280			ARC
2018-10-14	15:00:00	9260	9280	9290	7368	9290			ARC
2018-10-15	15:00:00	9270	9290	9300	7376	9300			ARC
2018-10-16	14:40:00	9280	9300	9310	7384	9310	Y		ARC
2018-10-17	14:30:00	9290	9310	9320	7392	9320			ARC
2018-10-18	14:35:00	9300	9320	9330	7400	9330			ARC
2018-10-19	14:35:00	9310	9330	9340	7408	9340			ARC
2018-10-20	15:30:00	9320	9340	9350	7416	9350			ARC
2018-10-21	15:30:00	9330	9350	9360	7424	9360			ARC
2018-10-22	14:35:00	9340	9360	9370	7432	9370			ARC
2018-10-23	14:45:00	9350	9370	9380	7440	9380	Y		ARC
2018-10-24	14:40:00	9360	9380	9390	7448	9390			KL
2018-10-25	14:45:00	9370	9390	9400	7456	9400			KL
2018-10-26	14:40:00	9380	9400	9410	7464	9410			KL
2018-10-27	14:00:00	9390	9410	9420	7472	9420			KL
2018-10-28	14:20:00	9400	9420	9430	7480	9430			KL
2018-10-29	15:00:00	9410	9430	9440	7488	9440			KL
2018-10-30	14:45:00	9420	9440	9450	7496	9450	Y		KL
2018-10-31	14:06:00	9430	9450	9460	7504	9460			AP			P4 row F has slightly less growth
2018-11-01	14:12:00	9440	9460	9470	7512	9470			AP
2018-11-02	13:15:00	9450	9470	9480	7520	9480			AP
2018-11-03	13:00:00	9460	9480	9490	7528	9490			AP
2018-11-04	12:22:00	9470	9490	9500	7536	9500			AP			daylight savings time
2018-11-05	12:15:00	9480	9500	9510	7544	9510			AP
2018-11-06	12:00:00	9490	9510	9520	7552	9520	Y		AP
2018-11-07	12:45:00	9500	9520	9530	7560	9530			CWB			waited at biomek at room temp for a bit pre transfer
2018-11-08	12:25:00	9510	9530	9540	7568	9540			CWB
2018-11-09	13:30:00	9520	9540	9550	7576	9550			CWB			waited at biomek at room temp for ~20 min bit pre transfer
2018-11-10	12:45:00	9530	9550	9560	7584	9560			CWB
2018-11-11	11:55:00	9540	9560	9570	7592	9570			CWB
2018-11-12	11:50:00	9550	9570	9580	7600	9580			CWB
2018-11-13	12:15:00	9560	9580	9590	7608	9590	Y		CWB			Did protocols on Span8, G3 tip aspirated too much, trashed tips, all should be ok
2018-11-14	13:15:00	9570	9590	9600	7616	9600			ARC
2018-11-15	13:40:00	9580	9600	9610	7624	9610			ANNB
2018-11-16	13:50:00	9590	9610	9620	7632	9620			ANNB
2018-11-17	15:10:00	9600	9620	9630	7640	9630			ANNB
2018-11-18	14:00:00	9610	9630	9640	7648	9640			ANNB
2018-11-19	14:00:00	9620	9640	9650	7656	9650			ANNB
2018-11-20	13:30:00	9630	9650	9660	7664	9660	Y		ANNB
2018-11-21	13:58:00	9640	9660	9670	7672	9670			MSJ		No
2018-11-22	14:00:00	9650	9670	9680	7680	9680			KL		No
2018-11-23	14:25:00	9660	9680	9690	7688	9690			MSJ		No
2018-11-24	14:20:00	9670	9690	9700	7696	9700			MSJ		No
2018-11-25	14:20:00	9680	9700	9710	7704	9710			MSJ		No
2018-11-26	14:25:00	9690	9710	9720	7712	9720			MSJ		No
2018-11-27	14:25:00	9700	9720	9730	7720	9730	Y		MSJ		No
2018-11-28	14:45:00	9710	9730	9740	7728	9740			CWB		No
2018-11-29	17:00:00							Y	CWB			P1_F6 was contaminated before last freeze, unfreezing from 11/20/18 stock
2018-11-30	15:50:00	9630	9660	9670	7672	9670			CWB
2018-12-01	17:00:00	9640	9670	9680	7680	9680			CWB
2018-12-02	17:30:00	9650	9680	9690	7688	9690			CWB			P4_H12 bottlenecked
2018-12-03	17:20:00	9660	9690	9700	7696	9700			CWB			P4_H12 looks empty
2018-12-04	16:40:00	9670	9700	9710	7704	9710	Y		CWB
2018-12-05	16:10:00	9680	9710	9720	7712	9720			KL
2018-12-06	16:10:00	9690	9720	9730	7720	9730			KL
2018-12-07	16:30:00	9700	9730	9740	7728	9740			KL
2018-12-08	16:00:00	9710	9740	9750	7736	9750			KL			P4_H12 not blank - maybe just really bottlenecked a lot on 12/2-12/3
2018-12-09	16:00:00	9720	9750	9760	7744	9760			KL
2018-12-11	16:15:00	9730	9760	9770	7752	9770			KL			Forgot transfer on 12/10/18, so plates were in incubators for 2 days. Added some water to edge wells and then transferred
2018-12-12	18:00:00	9740	9770	9780	7760	9780	Y		ARC			Done on Span8
2018-12-13	17:40:00	9750	9780	9790	7768	9790			AP			Done on Span8
2018-12-14	16:00:00	9760	9790	9800	7776	9800			AP
2018-12-15	15:10:00	9770	9800	9810	7784	9810			AP
2018-12-16	14:20:00	9780	9810	9820	7792	9820			AP
2018-12-17	13:50:00	9790	9820	9830	7800	9830			AP
2018-12-18	13:40:00	9800	9830	9840	7808	9840	Y		AP
2018-12-19	13:15:00	9810	9840	9850	7816	9850			ARC
2018-12-20	12:45:00	9820	9850	9860	7824	9860			ARC
2018-12-21	13:15:00	9830	9860	9870	7832	9870			ARC
2018-12-22	13:45:00	9840	9870	9880	7840	9880			ARC
2018-12-23	14:00:00	9850	9880	9890	7848	9890	Y		ARC
2019-01-02	15:20:00							Y	ARC		No
2019-01-03	15:40:00	9860	9890	9900	7856	9900			MSJ		No
2019-01-04	15:30:00	9870	9900	9910	7864	9910			MSJ		No	Most of column 12 in P4 went blank, due to some combination of warped plate / evaporation. I started a fitness assay using the previous day's plates, so I will unfreeze
2019-01-05								Y	MSJ			Unfreezing from 12/23/18 stock again
2019-01-06	13:40:00	9860	9890	9900	7856	9900			MSJ
2019-01-07	14:00:00	9870	9900	9910	7864	9910			MSJ			Slow transfer bc I was setting up ploidy stain too
2019-01-08	14:05:00	9880	9910	9920	7872	9920	Y		MSJ
2019-01-09	13:25:00	9890	9920	9930	7880	9930			AP
2019-01-10	13:00:00	9900	9930	9940	7888	9940			AP
2019-01-11	12:35:00	9910	9940	9950	7896	9950			AP
2019-01-12	12:12:00	9920	9950	9960	7904	9960			AP
2019-01-13	12:15:00	9930	9960	9970	7912	9970			AP
2019-01-14	12:20:00	9940	9970	9980	7920	9980			AP
2019-01-15	12:00:00	9950	9980	9990	7928	9990	Y		AP
2019-01-16	12:55:00	9960	9990	10000	7936	10000			CWB
2019-01-17	13:25:00	9970	10000	10010	7944	10010			CWB
2019-01-18	13:12:00	9980	10010	10020	7952	10020			CWB
2019-01-19	13:15:00	9990	10020	10030	7960	10030			MSJ
2019-01-20	13:00:00	10000	10030	10040	7968	10040			CWB
2019-01-21	13:15:00	10010	10040	10050	7976	10050	Y		CWB
2019-01-22	13:05:00	10020	10050	10060	7984	10060			CWB
2019-01-23	13:00:00	10030	10060	10070	7992	10070			KRL
2019-01-24	13:00:00	10040	10070	10080	8000	10080			KRL
2019-01-25	13:00:00	10050	10080	10090	8008	10090			KRL
2019-01-26	13:00:00	10060	10090	10100	8016	10100			KRL
2019-01-27	13:15:00	10070	10100	10110	8024	10110			KRL
2019-01-28	13:15:00	10080	10110	10120	8032	10120			KRL
2019-01-29	13:00:00	10090	10120	10130	8040	10130	Y		KRL
2019-01-30	13:00:00	10100	10130	10140	8048	10140			ANNB
2019-01-31	12:10:00	10110	10140	10150	8056	10150			ANNB
2019-02-01	12:10:00	10120	10150	10160	8064	10160			ANNB
2019-02-02	12:36:00	10130	10160	10170	8072	10170			ARC
2019-02-03	13:50:00	10140	10170	10180	8080	10180			ARC
2019-02-04	13:00:00	10150	10180	10190	8088	10190			ANNB
2019-02-05	13:10:00	10160	10190	10200	8096	10200	Y		ANNB	Y

## Sheet: Well_Info
384_well	platewell	plate	well	contam	strain	History
A01	P1A01	P1	A01	blank	blank	blank from beginning
A03	P1A02	P1	A02	blank	blank	blank between 3_2_17 and 5_3_17
A05	P1A03	P1	A03	No	a
A07	P1A04	P1	A04	No	a
A09	P1A05	P1	A05	No	a
A11	P1A06	P1	A06	No	a
A13	P1A07	P1	A07	lactis	lactis	lactis between 3/2/17 and 3/29/17
A15	P1A08	P1	A08	No	diploid
A17	P1A09	P1	A09	No	diploid
A19	P1A10	P1	A10	blank	blank	blank from beginning
A21	P1A11	P1	A11	blank	blank	blank around 6_4_15
A23	P1A12	P1	A12	blank	blank	blank from beginning
C01	P1B01	P1	B01	No	a
C03	P1B02	P1	B02	No	a
C05	P1B03	P1	B03	No	a
C07	P1B04	P1	B04	No	a
C09	P1B05	P1	B05	No	a
C11	P1B06	P1	B06	No	a
C13	P1B07	P1	B07	No	diploid
C15	P1B08	P1	B08	cerevisiae	cerevisiae	wrong cerevisiae between 2_1_17 and 11_25_17
C17	P1B09	P1	B09	glabrata	glabrata	glabrata between gen210 and 2/8/17
C19	P1B10	P1	B10	No	diploid
C21	P1B11	P1	B11	No	alpha
C23	P1B12	P1	B12	No	diploid
E01	P1C01	P1	C01	No	a
E03	P1C02	P1	C02	No	a
E05	P1C03	P1	C03	No	a
E07	P1C04	P1	C04	No	a
E09	P1C05	P1	C05	No	a
E11	P1C06	P1	C06	No	a
E13	P1C07	P1	C07	No	diploid
E15	P1C08	P1	C08	No	diploid
E17	P1C09	P1	C09	No	diploid
E19	P1C10	P1	C10	No	diploid
E21	P1C11	P1	C11	No	alpha
E23	P1C12	P1	C12	No	diploid
G01	P1D01	P1	D01	No	a
G03	P1D02	P1	D02	glabrata	glabrata	glabrata between gen210 and 2/8/17; looks like they might have coexisted for some time, FACS data looks like it is not just glabrata
G05	P1D03	P1	D03	No	a
G07	P1D04	P1	D04	blank	blank	blank from beginning
G09	P1D05	P1	D05	No	a
G11	P1D06	P1	D06	No	a
G13	P1D07	P1	D07	blank	blank	blank between 4/1/16 and 2/3/17
G15	P1D08	P1	D08	blank	blank	blank between 11/23/17 and 1/5/18
G17	P1D09	P1	D09	No	diploid
G19	P1D10	P1	D10	No	diploid
G21	P1D11	P1	D11	lactis	lactis	lactis between gen210 and 2/8/17
G23	P1D12	P1	D12	No	diploid
I01	P1E01	P1	E01	No	a
I03	P1E02	P1	E02	No	a
I05	P1E03	P1	E03	No	a
I07	P1E04	P1	E04	No	a
I09	P1E05	P1	E05	No	a
I11	P1E06	P1	E06	blank	blank	blank between 2/17/18 and 4/2/18
I13	P1E07	P1	E07	blank	blank	blank between 3/3/17 and 5/3/17
I15	P1E08	P1	E08	blank	blank	blank between 11/23/17 and 1/5/18
I17	P1E09	P1	E09	No	diploid
I19	P1E10	P1	E10	No	diploid
I21	P1E11	P1	E11	No	alpha
I23	P1E12	P1	E12	No	diploid
K01	P1F01	P1	F01	No	a
K03	P1F02	P1	F02	No	a
K05	P1F03	P1	F03	No	a
K07	P1F04	P1	F04	No	a
K09	P1F05	P1	F05	No	a
K11	P1F06	P1	F06	blank	blank	blank from beginning
K13	P1F07	P1	F07	No	diploid
K15	P1F08	P1	F08	No	diploid
K17	P1F09	P1	F09	No	diploid
K19	P1F10	P1	F10	No	diploid
K21	P1F11	P1	F11	No	alpha
K23	P1F12	P1	F12	glabrata	glabrata	glabrata between gen210 and 2/8/17
M01	P1G01	P1	G01	No	a
M03	P1G02	P1	G02	cerevisiae	cerevisiae	went blank between beginning and 1_26_16 and got filled in between 4_1_16 and 2_3_17
M05	P1G03	P1	G03	blank	blank	blank between beginning and 1/26/16
M07	P1G04	P1	G04	No	a
M09	P1G05	P1	G05	No	a
M11	P1G06	P1	G06	cerevisiae	cerevisiae	wrong cerevisiae between beginning and 2_1_17
M13	P1G07	P1	G07	No	diploid
M15	P1G08	P1	G08	No	diploid
M17	P1G09	P1	G09	No	diploid
M19	P1G10	P1	G10	No	diploid
M21	P1G11	P1	G11	No	alpha
M23	P1G12	P1	G12	blank	blank	blank from beginning
O01	P1H01	P1	H01	glabrata	glabrata	glabrata between 2/8/17 and 3/2/17; FACS data looks like it is not just glabrata
O03	P1H02	P1	H02	No	a
O05	P1H03	P1	H03	blank	blank	blank between beginning and 1/26/16
O07	P1H04	P1	H04	No	a
O09	P1H05	P1	H05	No	a
O11	P1H06	P1	H06	No	a
O13	P1H07	P1	H07	No	diploid
O15	P1H08	P1	H08	No	diploid
O17	P1H09	P1	H09	No	diploid
O19	P1H10	P1	H10	No	diploid
O21	P1H11	P1	H11	No	alpha
O23	P1H12	P1	H12	No	diploid
A02	P2A01	P2	A01	No	a
A04	P2A02	P2	A02	blank	blank	blank from beginning
A06	P2A03	P2	A03	No	a
A08	P2A04	P2	A04	No	a
A10	P2A05	P2	A05	No	a
A12	P2A06	P2	A06	No	a
A14	P2A07	P2	A07	No	diploid
A16	P2A08	P2	A08	blank	blank	blank between 4_1_16 and 2_3_17
A18	P2A09	P2	A09	No	diploid
A20	P2A10	P2	A10	blank	blank	blank from beginning
A22	P2A11	P2	A11	No	alpha
A24	P2A12	P2	A12	blank	blank	blank from beginning
C02	P2B01	P2	B01	No	a
C04	P2B02	P2	B02	No	a
C06	P2B03	P2	B03	No	a
C08	P2B04	P2	B04	No	a
C10	P2B05	P2	B05	No	a
C12	P2B06	P2	B06	No	a
C14	P2B07	P2	B07	No	diploid
C16	P2B08	P2	B08	No	diploid
C18	P2B09	P2	B09	No	diploid
C20	P2B10	P2	B10	No	diploid
C22	P2B11	P2	B11	No	alpha
C24	P2B12	P2	B12	No	diploid
E02	P2C01	P2	C01	No	a
E04	P2C02	P2	C02	No	a
E06	P2C03	P2	C03	No	a
E08	P2C04	P2	C04	No	a
E10	P2C05	P2	C05	No	a
E12	P2C06	P2	C06	No	a
E14	P2C07	P2	C07	No	diploid
E16	P2C08	P2	C08	No	diploid
E18	P2C09	P2	C09	No	diploid
E20	P2C10	P2	C10	No	diploid
E22	P2C11	P2	C11	No	alpha
E24	P2C12	P2	C12	No	diploid
G02	P2D01	P2	D01	No	a
G04	P2D02	P2	D02	No	a
G06	P2D03	P2	D03	No	a
G08	P2D04	P2	D04	blank	blank	blank from beginning
G10	P2D05	P2	D05	No	a
G12	P2D06	P2	D06	No	a
G14	P2D07	P2	D07	blank	blank	blank between beginning and 1_26_16
G16	P2D08	P2	D08	No	diploid
G18	P2D09	P2	D09	No	diploid
G20	P2D10	P2	D10	No	diploid
G22	P2D11	P2	D11	No	alpha
G24	P2D12	P2	D12	No	diploid
I02	P2E01	P2	E01	blank	blank	blank between 5_15_18 and 1_10_19
I04	P2E02	P2	E02	No	a
I06	P2E03	P2	E03	No	a
I08	P2E04	P2	E04	No	a
I10	P2E05	P2	E05	blank	blank	blank between 1_15_18 and 2_17_18
I12	P2E06	P2	E06	No	a
I14	P2E07	P2	E07	blank	blank	blank between 3_2_17 and 5_3_17
I16	P2E08	P2	E08	No	diploid
I18	P2E09	P2	E09	No	diploid
I20	P2E10	P2	E10	No	diploid
I22	P2E11	P2	E11	No	alpha
I24	P2E12	P2	E12	No	diploid
K02	P2F01	P2	F01	No	a
K04	P2F02	P2	F02	No	a
K06	P2F03	P2	F03	No	a
K08	P2F04	P2	F04	No	a
K10	P2F05	P2	F05	No	a
K12	P2F06	P2	F06	blank	blank	blank from beginning
K14	P2F07	P2	F07	No	diploid
K16	P2F08	P2	F08	No	diploid
K18	P2F09	P2	F09	No	diploid
K20	P2F10	P2	F10	blank	blank	blank between 4_1_16 and 2_3_17
K22	P2F11	P2	F11	No	alpha
K24	P2F12	P2	F12	No	diploid
M02	P2G01	P2	G01	No	a
M04	P2G02	P2	G02	No	a
M06	P2G03	P2	G03	blank	blank	blank between beginning and 1_26_16
M08	P2G04	P2	G04	No	a
M10	P2G05	P2	G05	No	a
M12	P2G06	P2	G06	No	a
M14	P2G07	P2	G07	blank	blank	blank between 2_17_18 and 4_2_18
M16	P2G08	P2	G08	No	diploid
M18	P2G09	P2	G09	No	diploid
M20	P2G10	P2	G10	No	diploid
M22	P2G11	P2	G11	No	alpha
M24	P2G12	P2	G12	blank	blank	blank from beginning
O02	P2H01	P2	H01	No	a
O04	P2H02	P2	H02	No	a
O06	P2H03	P2	H03	No	a
O08	P2H04	P2	H04	No	a
O10	P2H05	P2	H05	No	a
O12	P2H06	P2	H06	No	a
O14	P2H07	P2	H07	No	diploid
O16	P2H08	P2	H08	No	diploid
O18	P2H09	P2	H09	No	diploid
O20	P2H10	P2	H10	No	diploid
O22	P2H11	P2	H11	No	alpha
O24	P2H12	P2	H12	No	diploid
B01	P3A01	P3	A01	blank	blank	blank between 2_23_16 and 4_1_16
B03	P3A02	P3	A02	blank	blank	blank between 4_1_16 and 2_3_17
B05	P3A03	P3	A03	blank	blank	blank from beginning
B07	P3A04	P3	A04	blank	blank	blank between beginning and 1_26_16
B09	P3A05	P3	A05	blank	blank	blank between 4_1_16 and 2_3_17
B11	P3A06	P3	A06	blank	blank	blank between 4_1_16 and 2_3_17
B13	P3A07	P3	A07	blank	blank	blank between 4_1_16 and 2_3_17
B15	P3A08	P3	A08	blank	blank	blank between 2_23_16 and 4_1_16
B17	P3A09	P3	A09	blank	blank	blank between 2_23_16 and 4_1_16
B19	P3A10	P3	A10	blank	blank	blank from beginning
B21	P3A11	P3	A11	blank	blank	blank between 2_23_16 and 4_1_16
B23	P3A12	P3	A12	blank	blank	blank from beginning
D01	P3B01	P3	B01	blank	blank	blank between 5_15_18 and 1_10_19
D03	P3B02	P3	B02	blank	blank	blank between 1_26_16 and 2_23_16
D05	P3B03	P3	B03	blank	blank	blank between 1_26_16 and 2_23_16
D07	P3B04	P3	B04	blank	blank	blank between 1_26_16 and 2_23_16
D09	P3B05	P3	B05	blank	blank	blank between 1_26_16 and 2_23_16
D11	P3B06	P3	B06	No	a
D13	P3B07	P3	B07	No	diploid
D15	P3B08	P3	B08	No	diploid
D17	P3B09	P3	B09	blank	blank	blank between 11_23_17 and 12_9_17
D19	P3B10	P3	B10	No	diploid
D21	P3B11	P3	B11	No	alpha
D23	P3B12	P3	B12	blank	blank	blank between 2_23_16 and 4_1_16
F01	P3C01	P3	C01	blank	blank	blank between 5_15_18 and 1_10_19
F03	P3C02	P3	C02	blank	blank	blank between 5_15_18 and 1_10_19
F05	P3C03	P3	C03	No	a
F07	P3C04	P3	C04	No	a
F09	P3C05	P3	C05	No	a
F11	P3C06	P3	C06	No	a
F13	P3C07	P3	C07	No	diploid
F15	P3C08	P3	C08	blank	blank	blank between 4_1_16 and 2_3_17
F17	P3C09	P3	C09	No	diploid
F19	P3C10	P3	C10	No	diploid
F21	P3C11	P3	C11	No	alpha
F23	P3C12	P3	C12	blank	blank	blank between 5_15_18 and 1_10_19
H01	P3D01	P3	D01	blank	blank	blank between 5_15_18 and 1_10_19
H03	P3D02	P3	D02	No	a
H05	P3D03	P3	D03	No	a
H07	P3D04	P3	D04	blank	blank	blank from beginning
H09	P3D05	P3	D05	No	a
H11	P3D06	P3	D06	No	a
H13	P3D07	P3	D07	blank	blank	blank between 4_1_16 and 2_3_17
H15	P3D08	P3	D08	blank	blank	blank between 4_1_16 and 2_3_17
H17	P3D09	P3	D09	No	diploid
H19	P3D10	P3	D10	No	diploid
H21	P3D11	P3	D11	No	alpha
H23	P3D12	P3	D12	blank	blank	blank between 11_23_17 and 12_9_17
J01	P3E01	P3	E01	blank	blank	blank between 5_15_18 and 1_10_19
J03	P3E02	P3	E02	No	a
J05	P3E03	P3	E03	No	a
J07	P3E04	P3	E04	No	a
J09	P3E05	P3	E05	blank	blank	blank between 11_23_17 and 12_9_17
J11	P3E06	P3	E06	blank	blank	blank between 2_17_18 and 4_2_18
J13	P3E07	P3	E07	blank	blank	blank between 3_3_17 and 5_3_17
J15	P3E08	P3	E08	No	diploid
J17	P3E09	P3	E09	blank	blank	blank between 11_23_17 and 12_9_17
J19	P3E10	P3	E10	No	diploid
J21	P3E11	P3	E11	No	alpha
J23	P3E12	P3	E12	No	diploid
L01	P3F01	P3	F01	blank	blank	blank between 5_15_18 and 1_10_19
L03	P3F02	P3	F02	No	a
L05	P3F03	P3	F03	No	a
L07	P3F04	P3	F04	No	a
L09	P3F05	P3	F05	No	a
L11	P3F06	P3	F06	blank	blank	blank from beginning
L13	P3F07	P3	F07	No	diploid
L15	P3F08	P3	F08	No	diploid
L17	P3F09	P3	F09	No	diploid
L19	P3F10	P3	F10	No	diploid
L21	P3F11	P3	F11	No	alpha
L23	P3F12	P3	F12	No	diploid
N01	P3G01	P3	G01	blank	blank	blank between 5_15_18 and 1_10_19
N03	P3G02	P3	G02	No	a
N05	P3G03	P3	G03	No	a
N07	P3G04	P3	G04	No	a
N09	P3G05	P3	G05	No	a
N11	P3G06	P3	G06	No	a
N13	P3G07	P3	G07	No	diploid
N15	P3G08	P3	G08	No	diploid
N17	P3G09	P3	G09	No	diploid
N19	P3G10	P3	G10	No	diploid
N21	P3G11	P3	G11	No	alpha
N23	P3G12	P3	G12	blank	blank	blank from beginning
P01	P3H01	P3	H01	blank	blank	blank between beginning and 1_26_16
P03	P3H02	P3	H02	No	a
P05	P3H03	P3	H03	No	a
P07	P3H04	P3	H04	No	a
P09	P3H05	P3	H05	No	a
P11	P3H06	P3	H06	blank	blank	blank between 5_15_18 and 1_10_19
P13	P3H07	P3	H07	blank	blank	blank between 4_1_16 and 2_3_17
P15	P3H08	P3	H08	blank	blank	blank between 4_1_16 and 2_3_17
P17	P3H09	P3	H09	blank	blank	blank between 6_15_17 and 11_23_17
P19	P3H10	P3	H10	blank	blank	blank between 6_15_17 and 11_23_17
P21	P3H11	P3	H11	blank	blank	blank between 11_23_17 and 12_9_17
P23	P3H12	P3	H12	blank	blank	blank between beginning and 1_26_16

## Sheet: Fitness_Data
platewell	Plate	Well	Gen70_s_R1	Gen70_s_R2	Gen70_s	Gen70_s_scaled	Gen550_s_R1	Gen550_s_R2	Gen550_s	Gen550_s_scaled	Gen1410_s_R1	Gen1410_s_R2	Gen1410_s	Gen1410_s_scaled	Gen2640_s_R1	Gen2640_s_R2	Gen2640_s	Gen2640_s_scaled	Gen3630_s_R1	Gen3630_s_R2	Gen3630_s	Gen3630_s_scaled	Gen5150_s_R1	Gen5150_s_R2	Gen5150_s	Gen5150_s_scaled	Gen7530_s_R1	Gen7530_s_R2	Gen7530_s	Gen7530_s_scaled	Gen10150_s_R1	Gen10150_s_R2	Gen10150_s	Gen10150_s_scaled
P1A01	P1	A01
P1A02	P1	A02	-0.0753061	-0.0620713	-0.0686887	-0.0729248	-0.0635893	-0.0556219	-0.0596056	-0.0668975	-0.0354291	-0.034205	-0.0348171	-0.042109	-0.018092	-0.0109931	-0.0145425	-0.0187786	0.0103916	0.0137599	0.0120757	0.00783962	0.0147003	0.0186315	0.0166659	0.00937401
P1A03	P1	A03	-0.0770274	-0.0764592	-0.0767433	-0.0809794	-0.0463209	-0.0425348	-0.0444278	-0.0517197	-0.0263845	-0.022327	-0.0243558	-0.0316477	-0.00590377	-0.00137406	-0.00363892	-0.00787503	0.00399384	0.0140562	0.00902502	0.00478891	-0.00599992	0.00753694	0.000768512	-0.00652339	0.00825888	0.0129472	0.010603	0.00636693	0.0144914	0.0115127	0.013002	0.00571011
P1A04	P1	A04	-0.0715817	-0.0809523	-0.076267	-0.0805031	-0.0523509	-0.0562165	-0.0542837	-0.0615756	-0.017043	-0.015396	-0.0162195	-0.0235114	-0.00200692	-0.00288079	-0.00244386	-0.00667997	0.00527031	0.0246637	0.014967	0.0107309	0.00147025	0.0208236	0.0111469	0.00385501	0.0505152	0.0481795	0.0493473	0.0451112	0.0326403	0.0329653	0.0328028	0.0255109
P1A05	P1	A05	-0.0835208	-0.0752927	-0.0794067	-0.0836429	-0.0423658	-0.0384589	-0.0404124	-0.0477043	-0.0197547	-0.0214904	-0.0206226	-0.0279145	-0.0077982	0.00406062	-0.00186879	-0.0061049	0.00751998	0.00652157	0.00702078	0.00278466	0.00639528	0.0159823	0.0111888	0.00389689	0.0273552	0.0275436	0.0274494	0.0232133	0.0320506	0.021394	0.0267223	0.0194304
P1A06	P1	A06	-0.0322562	-0.0182026	-0.0252294	-0.0294655	0.00633385	0.00707069	0.00670227	-0.000589628	0.0187781	0.0193824	0.0190802	0.0117883	0.0262305	0.0320574	0.029144	0.0249079	0.016443	0.0326327	0.0245379	0.0203018	0.036026	0.0391009	0.0375635	0.0302716	0.0449999	0.0491831	0.0470915	0.0428554	0.057103	0.0562736	0.0566883	0.0493964
P1A07	P1	A07	-0.185882	-0.14502	-0.165451	-0.169687	-0.128424	-0.134702	-0.131563	-0.138855	-0.128921	-0.115632	-0.122277	-0.129569	-0.0860362	-0.0743309	-0.0801835	-0.0844196	-0.0592026	-0.0614178	-0.0603102	-0.0645463	-0.0336957	-0.0243424	-0.029019	-0.0363109
P1A08	P1	A08	-0.197633	-0.177279	-0.187456	-0.191692	-0.142168	-0.129706	-0.135937	-0.143229	-0.0909208	-0.115048	-0.102984	-0.110276	-0.0813495	-0.0666018	-0.0739757	-0.0782118	-0.0506043	-0.0713187	-0.0609615	-0.0651976	-0.0310294	-0.0388207	-0.0349251	-0.042217	-0.0269802	-0.0230169	-0.0249986	-0.0292347	-0.0198974	-0.0298453	-0.0248713	-0.0321632
P1A09	P1	A09	-0.164085	-0.109152	-0.136619	-0.140855	4.02377e-05	-0.000901836	-0.000430799	-0.0077227	0.00774236	0.0133892	0.0105658	0.00327386	0.0249979	0.0354655	0.0302317	0.0259956	0.0476489	0.0468171	0.047233	0.0429968	0.0438871	0.0629723	0.0534297	0.0461378	0.0746263	0.0804936	0.0775599	0.0733238	0.0730431	0.0730187	0.0730309	0.065739
P1A10	P1	A10	-0.19551	-0.192114	-0.193812	-0.198048	0.0823639	0.0779072	0.0801355	0.0728436	0.0613703	0.082723	0.0720467	0.0647548	-0.206759	-0.181694	-0.194226	-0.198463	-0.201875	-0.20028	-0.201077	-0.205313	0.0764865	0.0880763	0.0822814	0.0749895	-0.230106	-0.189559	-0.209833	-0.214069	0.0772231	0.0832206	0.0802218	0.0729299
P1A11	P1	A11	-0.0345291	-0.0295427	-0.0320359	-0.036272
P1A12	P1	A12	0.0187296	0.0204044	0.019567	0.0153309	-0.123732	-0.0918775	-0.107805	-0.115097	-0.154664	-0.0902648	-0.122464	-0.129756	0.0210448	0.00496775	0.0130063	0.00877017	0.0119485	0.029297	0.0206227	0.0163866	-0.0991849	-0.0778531	-0.088519	-0.0958109	0.0289454	0.0127996	0.0208725	0.0166364	-0.114133	-0.0796286	-0.0968809	-0.104173
P1B01	P1	B01	-0.0705939	-0.0731118	-0.0718528	-0.0760889	-0.0573106	-0.0637535	-0.060532	-0.0678239	-0.0453467	-0.047502	-0.0464244	-0.0537163	-0.0183749	-0.0105772	-0.0144761	-0.0187122	-0.020011	-0.00296524	-0.0114881	-0.0157243	0.0282136	0.0276756	0.0279446	0.0206527	0.0393643	0.0641149	0.0517396	0.0475035	0.0491644	0.0566899	0.0529272	0.0456353
P1B02	P1	B02	-0.0597761	-0.0634782	-0.0616271	-0.0658633	-0.0492228	-0.071528	-0.0603754	-0.0676673	-0.0251674	-0.0257593	-0.0254634	-0.0327553	0.00348208	0.000417445	0.00194976	-0.00228635	-0.000164172	0.0112701	0.00555298	0.00131687	0.00575215	-0.00532303	0.000214561	-0.00707734	0.0396814	0.0406983	0.0401898	0.0359537	0.0528311	0.0534856	0.0531583	0.0458664
P1B03	P1	B03	-0.062648	-0.0654071	-0.0640276	-0.0682637	-0.0499127	-0.0579583	-0.0539355	-0.0612274	-0.020838	-0.020633	-0.0207355	-0.0280274	-0.00619875	-0.00218665	-0.0041927	-0.00842882	0.00786486	0.0150944	0.0114796	0.0072435	0.0203481	0.0332942	0.0268211	0.0195292	0.0481391	0.0535697	0.0508544	0.0466183	0.0562263	0.0556653	0.0559458	0.0486539
P1B04	P1	B04	-0.0680987	-0.0699432	-0.069021	-0.0732571	-0.0560243	-0.0703632	-0.0631938	-0.0704857	-0.0282039	-0.0295343	-0.0288691	-0.036161	-0.0147337	-0.0114012	-0.0130674	-0.0173036	-0.00461527	0.00929172	0.00233823	-0.00189789	0.00439652	0.0139331	0.0091648	0.0018729	0.0308485	0.0238174	0.0273329	0.0230968	0.0223706	0.0305399	0.0264552	0.0191633
P1B05	P1	B05	-0.0723284	-0.0787308	-0.0755296	-0.0797657	-0.0541664	-0.0600806	-0.0571235	-0.0644154	-0.0340501	-0.0325394	-0.0332947	-0.0405866	-0.0104987	-0.0166089	-0.0135538	-0.0177899	0.00354062	0.0148743	0.00920744	0.00497133	0.014699	0.0145367	0.0146179	0.00732596	0.0609298	0.0644813	0.0627055	0.0584694	0.0734037	0.0711305	0.0722671	0.0649752
P1B06	P1	B06	-0.0754771	-0.0800307	-0.0777539	-0.08199	-0.0430545	-0.0417135	-0.042384	-0.0496759	-0.0173531	-0.0235853	-0.0204692	-0.0277611	-0.0187027	-0.00519298	-0.0119478	-0.0161839	0.0149317	0.0194825	0.0172071	0.012971	0.0164555	0.0162953	0.0163754	0.00908352	0.033482	0.0331713	0.0333267	0.0290905	0.0445391	0.0420669	0.043303	0.0360111
P1B07	P1	B07	-0.20054	-0.155646	-0.178093	-0.182329	-0.0142408	-0.0183713	-0.016306	-0.0235979	0.0120553	0.022428	0.0172417	0.00994977	0.0343079	0.0376957	0.0360018	0.0317657	0.0355125	0.0662039	0.0508582	0.0466221	0.0485967	0.0666519	0.0576243	0.0503324	0.0642474	0.0809309	0.0725891	0.068353	0.0901452	0.0868632	0.0885042	0.0812123
P1B08	P1	B08	-0.171185	-0.146858	-0.159021	-0.163257	-0.127345	-0.152392	-0.139868	-0.14716	-0.0133192	-0.00528345	-0.0093013	-0.0165932	0.00409118	0.019881	0.0119861	0.00774996	-0.0250857	-0.00900519	-0.0170454	-0.0212816		0.00462462	0.00462462	-0.00266728		0.00185732	0.00185732	-0.00237879
P1B09	P1	B09	-0.190484	-0.134656	-0.16257	-0.166806	-0.14651	-0.125719	-0.136115	-0.143407	-0.154476	-0.127029	-0.140753	-0.148044	-0.0481577	-0.0404412	-0.0442995	-0.0485356	0.0442272	0.0482695	0.0462484	0.0420123
P1B10	P1	B10	-0.202022	-0.157593	-0.179808	-0.184044	-0.159294	-0.128156	-0.143725	-0.151017	-0.0110231	-0.00595598	-0.00848953	-0.0157814	0.0115176	0.0155754	0.0135465	0.00931036	0.0343579	0.0447766	0.0395672	0.0353311	0.039948	0.0465016	0.0432248	0.0359329	0.0583093	0.058917	0.0586132	0.0543771	0.0635883	0.0645776	0.064083	0.0567911
P1B11	P1	B11	-0.192509	-0.173457	-0.182983	-0.187219	-0.017212	-0.0232521	-0.0202321	-0.027524	-0.00526859	0.0044013	-0.000433644	-0.00772555	0.00845423	0.0205788	0.0145165	0.0102804	0.0114092	0.0274375	0.0194233	0.0151872	0.0171645	0.0335602	0.0253623	0.0180704	0.0447831	0.0517308	0.0482569	0.0440208	0.0481223	0.0514693	0.0497958	0.0425039
P1B12	P1	B12	-0.196485	-0.17175	-0.184118	-0.188354	-0.124265	-0.118065	-0.121165	-0.128456	-0.019465	-0.0186349	-0.01905	-0.0263419	0.00843617	0.0116091	0.0100227	0.00578654	0.0110884	0.0114785	0.0112835	0.00704737	0.0293469	0.0358807	0.0326138	0.0253219	0.0498588	0.0542404	0.0520496	0.0478135	0.0501776	0.0546205	0.052399	0.0451071
P1C01	P1	C01	-0.0636409	-0.0694643	-0.0665526	-0.0707887	-0.0576326	-0.0643807	-0.0610066	-0.0682985	-0.0298228	-0.0250731	-0.0274479	-0.0347398	-0.0121606	-0.00874614	-0.0104534	-0.0146895	-0.00502869	0.00125711	-0.00188579	-0.00612191	-0.00859752	-0.0102737	-0.00943559	-0.0167275	0.0179887	0.0221914	0.0200901	0.015854	0.00601792	0.0069927	0.00650531	-0.000786589
P1C02	P1	C02	-0.0799711	-0.0664327	-0.0732019	-0.0774381	-0.0481227	-0.0520476	-0.0500851	-0.057377	-0.0216376	-0.0159	-0.0187688	-0.0260607	-0.0033472	-0.00788408	-0.00561564	-0.00985175	-0.00898254	0.0011703	-0.00390612	-0.00814223	0.00352584	0.0186257	0.0110757	0.00378385	0.03758	0.0235866	0.0305833	0.0263472	0.0313421	0.027941	0.0296415	0.0223496
P1C03	P1	C03	-0.0547329	-0.0502598	-0.0524963	-0.0567325	-0.0386166	-0.0392638	-0.0389402	-0.0462321	-0.0331792	-0.0252288	-0.029204	-0.0364959	-0.000791564	-0.00202864	-0.0014101	-0.00564621	0.00667701	0.0182129	0.012445	0.00820884	0.0204291	0.0354761	0.0279526	0.0206607	0.0624997	0.0490407	0.0557702	0.0515341	0.0601968	0.0560495	0.0581232	0.0508313
P1C04	P1	C04	-0.0856281	-0.0842832	-0.0849556	-0.0891918	-0.0734775	-0.0810358	-0.0772566	-0.0845485	-0.0431859	-0.0419592	-0.0425726	-0.0498645	-0.0198456	-0.0211389	-0.0204923	-0.0247284	-0.00487612	0.00483064	-2.27409e-05	-0.00425885	0.0147811	0.0134381	0.0141096	0.0068177	0.0561126	0.0499936	0.0530531	0.048817	0.051547	0.0588591	0.055203	0.0479111
P1C05	P1	C05	-0.0843157	-0.0895944	-0.086955	-0.0911912	-0.052578	-0.0655708	-0.0590744	-0.0663663	-0.0359006	-0.0285254	-0.032213	-0.0395049	-0.00278556	-0.000636214	-0.00171089	-0.005947	0.0140681	0.00795562	0.0110119	0.00677576	0.0255737	0.0342717	0.0299227	0.0226308	0.0603525	0.0673735	0.063863	0.0596269	0.0717014	0.0773745	0.0745379	0.067246
P1C06	P1	C06	-0.0664199	-0.0857379	-0.0760789	-0.080315	-0.0332682	-0.0448892	-0.0390787	-0.0463706	-0.0132118	-0.0058546	-0.00953322	-0.0168251	0.00461574	-0.00595797	-0.000671114	-0.00490723	0.0212477	0.0204403	0.020844	0.0166079	0.0288347	0.0199237	0.0243792	0.0170873	0.0410328	0.0374018	0.0392173	0.0349812	0.0528961	0.0567801	0.0548381	0.0475462
P1C07	P1	C07	-0.170945	-0.134218	-0.152582	-0.156818	-0.00794712	-0.0201574	-0.0140523	-0.0213442					0.00490908	0.0219188	0.0134139	0.00917781	0.024364	0.0384943	0.0314291	0.027193	0.034067	0.0244389	0.029253	0.0219611	0.0444995	0.0362099	0.0403547	0.0361186	0.0545364	0.0568447	0.0556905	0.0483986
P1C08	P1	C08	-0.18205	-0.136305	-0.159177	-0.163414	-0.128601	-0.144702	-0.136651	-0.143943	-0.126014	-0.125878	-0.125946	-0.133238	-0.144685	-0.080376	-0.11253	-0.116767	0.0304573	0.0442647	0.037361	0.0331249	0.049355	0.0524537	0.0509044	0.0436125	0.06373	0.0711357	0.0674328	0.0631967	0.0790853	0.0802013	0.0796433	0.0723514
P1C09	P1	C09	-0.161946	-0.131432	-0.146689	-0.150925	0.090206	0.097858	0.094032	0.0867401	0.109742	0.11655	0.113146	0.105854	0.0645395	0.122073	0.0933061	0.08907	0.0966756	0.105555	0.101115	0.0968792	0.114875	0.107809	0.111342	0.10405	0.0946406	0.0975371	0.0960888	0.0918527	0.11406	0.10755	0.110805	0.103513
P1C10	P1	C10	-0.205648	-0.130338	-0.167993	-0.172229	-0.0793006	-0.128146	-0.103723	-0.111015	0.00542473	0.00576293	0.00559383	-0.00169808	0.0119773	0.0196646	0.015821	0.0115849	0.0260581	0.0345758	0.030317	0.0260808	0.0455687	0.0538189	0.0496938	0.0424019	0.0606588	0.0762105	0.0684347	0.0641985	0.0728583	0.0700816	0.0714699	0.064178
P1C11	P1	C11	-0.0232042	-0.0170664	-0.0201353	-0.0243714	-0.0153752	-0.0199893	-0.0176823	-0.0249742	0.00686381	0.0114386	0.00915121	0.00185931	0.0162064	0.0189389	0.0175727	0.0133366	0.0273338	0.0305895	0.0289617	0.0247255	0.0321884	0.0522981	0.0422433	0.0349514	0.0598165	0.0766964	0.0682564	0.0640203	0.0632268	0.0654269	0.0643269	0.0570349
P1C12	P1	C12	-0.20287	-0.146549	-0.17471	-0.178946	-0.132109	-0.119261	-0.125685	-0.132977	-0.0796915	-0.0559683	-0.0678299	-0.0751218	-0.0585363	-0.0575826	-0.0580595	-0.0622956	-0.0635715	-0.0553021	-0.0594368	-0.0636729	0.0303733	0.0328977	0.0316355	0.0243436	0.0494742	0.0562639	0.052869	0.0486329	0.0577264	0.0539556	0.055841	0.0485491
P1D01	P1	D01	-0.221469	-0.1826	-0.202035	-0.206271	-0.093679	-0.104118	-0.0988987	-0.106191	-0.047009	-0.0465472	-0.0467781	-0.05407	-0.0180519	-0.0192439	-0.0186479	-0.022884	-0.0144499	-0.0175398	-0.0159948	-0.020231	-0.028441	-0.0290362	-0.0287386	-0.0360305	0.0128678	0.0164643	0.014666	0.0104299	0.00414776	0.0112493	0.00769851	0.00040661
P1D02	P1	D02	0.0433549	0.0484386	0.0458967	0.0416606	0.0540618	0.0535662	0.053814	0.0465221	0.0811589	0.0784922	0.0798255	0.0725336	0.0558751	0.106638	0.0812563	0.0770202	0.0784405	0.103707	0.0910739	0.0868378
P1D03	P1	D03	-0.102243	-0.0972151	-0.099729	-0.103965	-0.0853705	-0.103366	-0.0943685	-0.10166	-0.0589854	-0.0480167	-0.053501	-0.0607929	-0.0268905	-0.0252494	-0.0260699	-0.0303061	-0.0133839	-0.00786939	-0.0106266	-0.0148627	-0.00572155	0.00269099	-0.00151528	-0.00880718	0.0156041	0.00668296	0.0111435	0.00690741	0.0130626	0.0178111	0.0154368	0.00814493
P1D04	P1	D04	-0.00455062	0.00339867	-0.000575972	-0.00481208	0.00549543	0.00635102	0.00592322	-0.00136868	0.00510422	0.0104291	0.00776667	0.000474764	0.0026637	-0.000197421	0.00123314	-0.00300297	0.00580009	0.0120551	0.00892758	0.00469147	0.00311736	0.00533364	0.0042255	-0.0030664	0.0124498	0.00226956	0.0073597	0.00312359	0.0131574	0.00934707	0.0112522	0.00396032
P1D05	P1	D05	-0.0556048	-0.0629148	-0.0592598	-0.0634959	-0.0361181	-0.0430182	-0.0395681	-0.04686	-0.032804	-0.0274941	-0.030149	-0.0374409	-0.013571	-0.0118295	-0.0127003	-0.0169364	0.000644758	0.00414883	0.0023968	-0.00183932	0.0030088	0.010125	0.0065669	-0.000724999	0.0217739	0.0250504	0.0234121	0.019176	0.00731115	0.0114256	0.00936836	0.00207646
P1D06	P1	D06	-0.0743011	-0.0635472	-0.0689242	-0.0731603	-0.0520018	-0.0516657	-0.0518337	-0.0591256	-0.0373035	-0.0293075	-0.0333055	-0.0405974	-0.0136035	-0.0105562	-0.0120798	-0.0163159	-0.00898171	0.00737109	-0.000805313	-0.00504142	-0.00616114	0.00937561	0.00160723	-0.00568467	0.0197048	0.0318714	0.0257881	0.021552	0.0383596	0.0366343	0.037497	0.0302051
P1D07	P1	D07	-0.181669	-0.14193	-0.1618	-0.166036	-0.13457	-0.150868	-0.142719	-0.150011	-0.0848584	-0.0817014	-0.0832799	-0.0905718	-0.0427557	-0.0414523	-0.042104	-0.0463401	-0.0155512	-0.0182813	-0.0169162	-0.0211523
P1D08	P1	D08	-0.171253	-0.13655	-0.153901	-0.158138	-0.145502	-0.117675	-0.131589	-0.138881	-0.1065	-0.104676	-0.105588	-0.11288	0.0114192	0.00869198	0.0100556	0.00581948	0.0152057	0.0216206	0.0184132	0.0141771	0.0367254	0.0412528	0.0389891	0.0316972
P1D09	P1	D09	-0.165122	-0.151018	-0.15807	-0.162306	-0.12806	-0.13041	-0.129235	-0.136527	-0.129018	-0.111908	-0.120463	-0.127755	-0.0178299	-0.0119551	-0.0148925	-0.0191286	0.01255	0.00240264	0.00747634	0.00324022	0.0184143	0.0125788	0.0154965	0.00820464	0.0329858	0.0294912	0.0312385	0.0270024	0.0302406	0.0322778	0.0312592	0.0239673
P1D10	P1	D10	-0.168509	-0.143575	-0.156042	-0.160278	-0.16468	-0.130806	-0.147743	-0.155035	-0.142636	-0.13386	-0.138248	-0.14554	-0.152684	-0.106474	-0.129579	-0.133815	-0.0845236	-0.0918275	-0.0881755	-0.0924117	-0.0496705	-0.0455268	-0.0475987	-0.0548906	-0.0394105	-0.0302745	-0.0348425	-0.0390786	-0.0283841	-0.0196638	-0.024024	-0.0313159
P1D11	P1	D11	-0.0185597	-0.0201663	-0.019363	-0.0235991	-0.0207774	-0.0282908	-0.0245341	-0.031826	0.00259061	0.00140058	0.0019956	-0.0052963	0.0162664	0.0170446	0.0166555	0.0124194	0.0260855	0.0243073	0.0251964	0.0209603
P1D12	P1	D12	-0.201586	-0.152043	-0.176814	-0.181051	-0.125496	-0.12456	-0.125028	-0.13232	-0.130009	-0.112931	-0.12147	-0.128762	-0.02974	-0.0223116	-0.0260258	-0.0302619	0.0544608	0.0599727	0.0572167	0.0529806	0.0674358	0.069493	0.0684644	0.0611725	0.0767313	0.0769459	0.0768386	0.0726025	0.061573	0.0659307	0.0637519	0.05646
P1E01	P1	E01	-0.0709013	-0.0712754	-0.0710883	-0.0753245	-0.0605434	-0.0741831	-0.0673633	-0.0746552	-0.0480608	-0.0460738	-0.0470673	-0.0543592	-0.015719	-0.0130273	-0.0143731	-0.0186093	-0.00337512	-0.0013868	-0.00238096	-0.00661707	0.0142356	0.00889737	0.0115665	0.00427457	0.0345644	0.0374627	0.0360135	0.0317774	0.0579041	0.0612151	0.0595596	0.0522677
P1E02	P1	E02	-0.0823283	-0.0738131	-0.0780707	-0.0823068	-0.0615338	-0.0675499	-0.0645419	-0.0718338	-0.0316249	-0.0355505	-0.0335877	-0.0408796	-0.010543	-0.0130014	-0.0117722	-0.0160083	0.000791912	0.00697156	0.00388174	-0.000354375	0.00470992	0.00904072	0.00687532	-0.000416583	0.0395331	0.0494677	0.0445004	0.0402643	0.0803902	0.0817192	0.0810547	0.0737628
P1E03	P1	E03	-0.070719	-0.07281	-0.0717645	-0.0760006	-0.0595245	-0.0659915	-0.062758	-0.0700499	-0.0398559	-0.0412765	-0.0405662	-0.0478581	-0.0191346	-0.0247409	-0.0219377	-0.0261739	0.00933443	0.023749	0.0165417	0.0123056	0.0288329	0.039795	0.0343139	0.027022	0.055294	0.0654825	0.0603882	0.0561521	0.0652689	0.0683967	0.0668328	0.0595409
P1E04	P1	E04	-0.0658008	-0.0723837	-0.0690922	-0.0733283	-0.0614967	-0.0653296	-0.0634131	-0.070705	-0.0380469	-0.0324777	-0.0352623	-0.0425542	-0.008917	-0.00362836	-0.00627268	-0.0105088	0.000871155	0.00851841	0.00469478	0.000458671	0.00848184	0.0182646	0.0133732	0.00608133	0.0435587	0.0454815	0.0445201	0.040284	0.0484165	0.035738	0.0420773	0.0347854
P1E05	P1	E05	-0.0630142	-0.0652524	-0.0641333	-0.0683694	-0.0444973	-0.0490542	-0.0467758	-0.0540677	-0.0313229	-0.0224753	-0.0268991	-0.034191	-0.0108118	-0.0116199	-0.0112159	-0.015452	-0.00978082	0.00174408	-0.00401837	-0.00825448	-0.0109972	-0.00261091	-0.00680407	-0.014096	0.0154657	0.00576174	0.0106137	0.0063776	0.0170276	0.0181772	0.0176024	0.0103105
P1E06	P1	E06	-0.069709	-0.072763	-0.071236	-0.0754721	-0.0334988	-0.0425398	-0.0380193	-0.0453112	-0.0231419	-0.0114443	-0.0172931	-0.024585	0.00418455	0.00706813	0.00562634	0.00139023	0.0221701	0.0262141	0.0241921	0.019956	0.00661997	0.0240374	0.0153287	0.00803681	0.0402327	0.037581	0.0389068	0.0346707
P1E07	P1	E07	-0.169478	-0.148808	-0.159143	-0.163379	-0.001844	0.0017046	-6.96979e-05	-0.0073616	4.65209e-05	0.00486751	0.00245701	-0.00483489	0.0121726	0.0203906	0.0162816	0.0120455	0.0289345	0.0314415	0.030188	0.0259519	0.0271954	0.037868	0.0325317	0.0252398
P1E08	P1	E08	-0.150448	-0.136471	-0.143459	-0.147696	-0.0321098	-0.0408929	-0.0365014	-0.0437933	-0.0269983	-0.0356682	-0.0313333	-0.0386252	-0.0173923	-0.0067257	-0.012059	-0.0162951	-0.00187996	-0.0101106	-0.00599529	-0.0102314	0.0099664	0.00981218	0.00988929	0.00259739
P1E09	P1	E09	-0.150831	-0.134717	-0.142774	-0.14701	-0.140901	-0.122896	-0.131899	-0.139191	-0.151888	-0.121712	-0.1368	-0.144092	-0.151822	-0.121802	-0.136812	-0.141048	-0.133595	-0.128392	-0.130994	-0.13523	-0.000632901	0.00063322	1.59483e-07	-0.00729174	0.031575	0.031615	0.031595	0.0273589	0.0570387	0.0564466	0.0567426	0.0494507
P1E10	P1	E10	-0.184296	-0.131071	-0.157683	-0.161919	-0.121225	-0.112155	-0.11669	-0.123982	-0.122554	-0.120457	-0.121505	-0.128797	-0.0736542	-0.0687087	-0.0711814	-0.0754176	-0.0356404	-0.0333814	-0.0345109	-0.038747	0.0453969	0.04302	0.0442084	0.0369165	0.0582734	0.0532034	0.0557384	0.0515023	0.0759209	0.0589931	0.067457	0.0601651
P1E11	P1	E11	-0.0192083	-0.0156408	-0.0174246	-0.0216607	-0.0206871	-0.0186515	-0.0196693	-0.0269612	-0.00794775	-0.00576468	-0.00685621	-0.0141481	0.0671754	0.102503	0.0848391	0.080603	0.129499	0.138869	0.134184	0.129948	0.0882877	0.139383	0.113835	0.106543	0.163999	0.146598	0.155299	0.151063	0.160396	0.142741	0.151569	0.144277
P1E12	P1	E12	-0.190724	-0.138278	-0.164501	-0.168737	-0.149335	-0.123946	-0.13664	-0.143932	-0.182162	-0.14163	-0.161896	-0.169188	-0.00385194	0.0044163	0.000282184	-0.00395393	0.0247117	0.023441	0.0240763	0.0198402	0.0536034	0.0484498	0.0510266	0.0437347	0.0630118	0.0566165	0.0598141	0.055578	0.0646954	0.0639226	0.064309	0.0570171
P1F01	P1	F01	-0.0780978	-0.0777599	-0.0779288	-0.0821649	-0.0540997	-0.048714	-0.0514068	-0.0586987	-0.00704658	-0.0125741	-0.00981033	-0.0171022	0.0134907	0.00751146	0.0105011	0.00626498	0.0231447	0.0163626	0.0197537	0.0155176	0.0245027	0.009832	0.0171673	0.00987542	0.0394349	0.0512655	0.0453502	0.0411141	0.0458581	0.0380935	0.0419758	0.0346839
P1F02	P1	F02	-0.0685832	-0.0741189	-0.0713511	-0.0755872	-0.0494833	-0.0569274	-0.0532053	-0.0604972	-0.0390451	-0.0495414	-0.0442932	-0.0515851	-0.0257732	-0.018633	-0.0222031	-0.0264392	-0.0119315	-0.00311112	-0.00752133	-0.0117574	-0.0283917	-0.0111135	-0.0197526	-0.0270445	0.0242331	0.0314241	0.0278286	0.0235925	0.0258502	0.0190223	0.0224363	0.0151444
P1F03	P1	F03	-0.0778408	-0.0797046	-0.0787727	-0.0830088	-0.0556389	-0.0534898	-0.0545644	-0.0618563	-0.0406522	-0.0375807	-0.0391165	-0.0464084	-0.0259165	-0.0238807	-0.0248986	-0.0291347	-0.0215628	-0.00500159	-0.0132822	-0.0175183	-0.018621	-0.00910291	-0.013862	-0.0211539	0.00914237	0.0153213	0.0122318	0.00799572	0.00770313	0.0167343	0.0122187	0.0049268
P1F04	P1	F04	-0.0740742	-0.0686291	-0.0713517	-0.0755878	-0.0488745	-0.0437607	-0.0463176	-0.0536095	-0.0321344	-0.021393	-0.0267637	-0.0340556	-0.0104595	-0.0108394	-0.0106494	-0.0148855	0.00816814	0.00542793	0.00679804	0.00256192	-0.00215134	0.00759151	0.00272009	-0.00457181	0.0299053	0.0300834	0.0299943	0.0257582	0.0341324	0.0255915	0.029862	0.0225701
P1F05	P1	F05	-0.0730783	-0.0666689	-0.0698736	-0.0741097	-0.0317714	-0.039941	-0.0358562	-0.0431481	-0.0239114	-0.0100896	-0.0170005	-0.0242924	-0.00389283	-0.00992764	-0.00691024	-0.0111463	-0.000947798	0.0130396	0.00604588	0.00180977	0.0208559	0.025014	0.0229349	0.015643	0.040525	0.0428577	0.0416914	0.0374553	0.0486156	0.0494245	0.04902	0.0417281
P1F06	P1	F06	-0.1645	-0.135185	-0.149842	-0.154078	-0.12267	-0.141904	-0.132287	-0.139579	-0.160493	-0.153368	-0.156931	-0.164223	-0.187185	-0.146899	-0.167042	-0.171278	-0.177697	-0.19757	-0.187634	-0.19187	-0.150044	-0.194779	-0.172411	-0.179703	-0.194689	-0.198106	-0.196397	-0.200633	-0.230885	-0.229857	-0.230371	-0.237663
P1F07	P1	F07	-0.185096	-0.124459	-0.154777	-0.159014	-0.133113	-0.08061	-0.106862	-0.114153	-0.0764535	-0.0687978	-0.0726257	-0.0799176	0.0215453	0.0280071	0.0247762	0.0205401	0.0415737	0.0549501	0.0482619	0.0440258	0.0424685	0.0373562	0.0399124	0.0326205	0.0643162	0.0558721	0.0600942	0.0558581	0.0703781	0.0629883	0.0666832	0.0593913
P1F08	P1	F08	-0.17318	-0.136966	-0.155073	-0.159309	0.0151721	0.0102636	0.0127179	0.00542597	0.013687	0.0159416	0.0148143	0.00752242	0.0374738	0.0380061	0.03774	0.0335039	0.050989	0.0630424	0.0570157	0.0527796	0.0634554	0.060729	0.0620922	0.0548003	0.0764003	0.061392	0.0688961	0.06466	0.0598882	0.0466292	0.0532587	0.0459668
P1F09	P1	F09	-0.169137	-0.140009	-0.154573	-0.158809	-0.106245	-0.115347	-0.110796	-0.118088	-0.00843046	0.00963628	0.000602907	-0.00668899	0.00574119	0.0144525	0.0100969	0.00586074	0.0253933	0.0238844	0.0246388	0.0204027	0.0380587	0.0343394	0.0361991	0.0289072	0.0439961	0.0531783	0.0485872	0.0443511	0.0525145	0.0530824	0.0527984	0.0455065
P1F10	P1	F10	-0.166349	-0.136924	-0.151637	-0.155873	-0.115816	-0.107658	-0.111737	-0.119029	-0.0687142	-0.0558111	-0.0622626	-0.0695545	0.0166817	0.0264942	0.0215879	0.0173518	0.0284173	0.0212157	0.0248165	0.0205804	0.053803	0.059971	0.056887	0.0495951	0.0794567	0.0845361	0.0819964	0.0777603	0.0824303	0.0819173	0.0821738	0.0748819
P1F11	P1	F11	-0.0108598	-0.00947089	-0.0101654	-0.0144015	-0.00413868	-0.0125279	-0.00833327	-0.0156252	-0.00148593	0.000437406	-0.000524263	-0.00781616	0.0210281	0.0168099	0.018919	0.0146829	0.0407854	0.0354194	0.0381024	0.0338663	0.0338025	0.0374305	0.0356165	0.0283246	0.0525053	0.0497022	0.0511038	0.0468677	0.0517215	0.0514859	0.0516037	0.0443118
P1F12	P1	F12	-0.159881	-0.132741	-0.146311	-0.150547	-0.0189643	-0.0278619	-0.0234131	-0.030705	-0.00383861	0.0105181	0.00333974	-0.00395216	0.0191174	0.0269988	0.0230581	0.018822	0.0360331	0.0341376	0.0350854	0.0308493
P1G01	P1	G01	-0.0591496	-0.0667551	-0.0629524	-0.0671885	-0.0491937	-0.048641	-0.0489174	-0.0562093	-0.0168911	-0.0273855	-0.0221383	-0.0294302	0.000860162	0.000945194	0.000902678	-0.00333343	0.015128	0.0162987	0.0157134	0.0114773	0.0183228	0.0216435	0.0199832	0.0126913	0.0425865	0.0532941	0.0479403	0.0437042	0.0431908	0.0417254	0.0424581	0.0351662
P1G02	P1	G02	-0.0717555	-0.0758991	-0.0738273	-0.0780634	-0.0606227	-0.066057	-0.0633399	-0.0706318					-0.175045		-0.175045	-0.179281	-0.0313917	-0.0235724	-0.0274821	-0.0317182	-0.00325321	0.00870111	0.00272395	-0.00456795	0.0296254	0.0290894	0.0293574	0.0251213	0.0398761	0.0298058	0.0348409	0.027549
P1G03	P1	G03	-0.0845322	-0.0725704	-0.0785513	-0.0827874	-0.0634622	-0.0511482	-0.0573052	-0.0645971	-0.0410366	-0.037454	-0.0392453	-0.0465372
P1G04	P1	G04	-0.0697349	-0.0763227	-0.0730288	-0.0772649	-0.0396202	-0.0405884	-0.0401043	-0.0473962	-0.0320407	-0.0326156	-0.0323282	-0.0396201	-0.011718	-0.00859059	-0.0101543	-0.0143904	0.000535159	0.0158579	0.00819654	0.00396043	-0.00146435	0.0137451	0.00614037	-0.00115153	0.0214875	0.0198132	0.0206503	0.0164142	0.0286578	0.0167453	0.0227016	0.0154097
P1G05	P1	G05	-0.0824333	-0.0717629	-0.0770981	-0.0813342	-0.0562852	-0.0585952	-0.0574402	-0.0647321	-0.0148061	-0.00669285	-0.0107495	-0.0180414	0.00100482	0.0037897	0.00239726	-0.00183885	0.0123596	0.022694	0.0175268	0.0132907	0.0173064	0.0312336	0.02427	0.0169781	0.0473942	0.0375638	0.042479	0.0382429	0.041231	0.0413707	0.0413009	0.034009
P1G06	P1	G06	-0.0707529	-0.069635	-0.0701939	-0.0744301	-0.0526365	-0.0554635	-0.05405	-0.0613419	-0.0267072	-0.0203718	-0.0235395	-0.0308314	-0.00828559	-0.00399086	-0.00613822	-0.0103743	0.0674117	0.0752051	0.0713084	0.0670723	0.103827	0.121735	0.112781	0.105489		0.131774	0.131774	0.127538	0.175795	0.165661	0.170728	0.163436
P1G07	P1	G07	-0.181972	-0.145871	-0.163922	-0.168158	-0.102548	-0.127882	-0.115215	-0.122507	-0.0719774	-0.0751103	-0.0735439	-0.0808358	0.00690817	-0.0474947	-0.0202933	-0.0245294	-0.0509824	-0.0284907	-0.0397366	-0.0439727	0.0364294	0.0407731	0.0386013	0.0313094	0.065999	0.0742523	0.0701257	0.0658896	0.079816	0.0743294	0.0770727	0.0697808
P1G08	P1	G08	-0.161582	-0.126393	-0.143987	-0.148223	-0.00778936	-0.0116424	-0.00971589	-0.0170078	0.0204418	0.0208439	0.0206429	0.013351	0.0363665	0.0415959	0.0389812	0.0347451	0.0482535	0.0631931	0.0557233	0.0514872	0.046649	0.0592888	0.0529689	0.045677	0.0715925	0.0684162	0.0700043	0.0657682	0.0663441	0.072219	0.0692816	0.0619897
P1G09	P1	G09	-0.166698	-0.162049	-0.164374	-0.16861	-0.117077	-0.106204	-0.11164	-0.118932	-0.120903	-0.0941249	-0.107514	-0.114806	0.0177095	0.0135056	0.0156076	0.0113715	0.045021	0.0436053	0.0443131	0.040077	0.0565789	0.0588578	0.0577184	0.0504264	0.070559	0.0739254	0.0722422	0.0680061	0.0827422	0.081042	0.0818921	0.0746002
P1G10	P1	G10	-0.0448689	-0.0526864	-0.0487776	-0.0530138	-0.00236928	9.97401e-05	-0.00113477	-0.00842667	0.0239643	0.0262805	0.0251224	0.0178305	0.0355904	0.0335619	0.0345762	0.0303401	0.0502278	0.0567098	0.0534688	0.0492327	0.0565463	0.0644725	0.0605094	0.0532175	0.0809798	0.0810011	0.0809904	0.0767543	0.0740274	0.0714229	0.0727251	0.0654332
P1G11	P1	G11	-0.0243175	-0.0213696	-0.0228435	-0.0270797	-0.0265424	-0.0205527	-0.0235476	-0.0308395	-0.00883124	0.00378939	-0.00252092	-0.00981282	0.0104934	0.0163218	0.0134076	0.00917147	0.0268583	0.0248636	0.025861	0.0216248	0.0309704	0.0278877	0.029429	0.0221371	0.0456437	0.0403657	0.0430047	0.0387686	0.0416791	0.0521993	0.0469392	0.0396473
P1G12	P1	G12	-0.0829028	0.0256696	-0.0286166	-0.0328527	-0.01372	-0.0195005	-0.0166102	-0.0239021	-0.0192926	-0.00395467	-0.0116237	-0.0189156	-0.0661114	-0.0602588	-0.0631851	-0.0674212	-0.0579107	0.00825518	-0.0248278	-0.0290639	-0.022313	-0.00692752	-0.0146202	-0.0219121	-0.0518271	-0.0498395	-0.0508333	-0.0550694	-0.00981031	-0.00277349	-0.0062919	-0.0135838
P1H01	P1	H01	-0.0691739	-0.0795441	-0.074359	-0.0785951	-0.0564113	-0.0648801	-0.0606457	-0.0679376	-0.0350417	-0.0351107	-0.0350762	-0.0423681	-0.00683325	-0.010531	-0.00868214	-0.0129182	0.0111517	0.000449215	0.00580043	0.00156432
P1H02	P1	H02	-0.0758026	-0.074333	-0.0750678	-0.0793039	-0.0740751	-0.0563831	-0.0652291	-0.072521	-0.046349	-0.0520042	-0.0491766	-0.0564685	-0.0186554	-0.0245874	-0.0216214	-0.0258575	-0.0146897	-0.0274529	-0.0210713	-0.0253074	-0.0179264	-0.0171041	-0.0175153	-0.0248072	0.0186582	0.0357127	0.0271855	0.0229494	0.0185823	0.0201404	0.0193613	0.0120694
P1H03	P1	H03	-0.0658086	-0.0698878	-0.0678482	-0.0720843	-0.0528672	-0.0456963	-0.0492818	-0.0565737	-0.0267663	-0.0291909	-0.0279786	-0.0352705
P1H04	P1	H04	-0.0703691	-0.0735857	-0.0719774	-0.0762135	-0.0634362	-0.0463274	-0.0548818	-0.0621737	-0.0361755	-0.0293892	-0.0327823	-0.0400742	-0.0108282	-0.0182985	-0.0145634	-0.0187995	0.0198307	0.00625832	0.0130445	0.00880842	-0.00104982	-0.000512442	-0.000781133	-0.00807303	0.0307559	0.0216467	0.0262013	0.0219652	0.024766	0.0249539	0.0248599	0.017568
P1H05	P1	H05	-0.0750302	-0.0735484	-0.0742893	-0.0785254	-0.0599361	-0.0563021	-0.0581191	-0.065411	-0.0390032	-0.0252476	-0.0321254	-0.0394173	-0.00010993	0.0017444	0.000817235	-0.00341888	0.0277205	0.0184269	0.0230737	0.0188376	0.00376029	0.0229644	0.0133624	0.00607045	0.0555488	0.0442197	0.0498843	0.0456481	0.0354901	0.0424773	0.0389837	0.0316918
P1H06	P1	H06	-0.0812452	-0.0754025	-0.0783239	-0.08256	-0.0510037	-0.0332367	-0.0421202	-0.0494121	-0.0176317	-0.0149367	-0.0162842	-0.0235761	0.00534268	-0.00235548	0.0014936	-0.00274251	0.0302987	0.0298924	0.0300956	0.0258595	0.0207831	0.0306867	0.0257349	0.018443	0.0522744	0.0506896	0.051482	0.0472459	0.0427244	0.0479112	0.0453178	0.0380259
P1H07	P1	H07	-0.163801	-0.15137	-0.157586	-0.161822	0.00229907	-0.00965149	-0.00367621	-0.0109681	0.0148823	0.0151964	0.0150394	0.00774745	0.0169573	0.011406	0.0141816	0.00994553	0.0242293	0.0282335	0.0262314	0.0219953	0.0363426	0.0431033	0.039723	0.0324311	0.0473384	0.0375907	0.0424645	0.0382284	0.0488624	0.0457268	0.0472946	0.0400027
P1H08	P1	H08	-0.176673	-0.137154	-0.156914	-0.16115	-0.0662336	-0.0708973	-0.0685654	-0.0758574	-0.0506782	-0.0537324	-0.0522053	-0.0594972	-0.0366302	-0.0301018	-0.033366	-0.0376021	-0.0232956	-0.0159507	-0.0196231	-0.0238593	0.0219603	0.0235895	0.0227749	0.015483	0.0617146	0.0557804	0.0587475	0.0545114	0.0645063	0.0724068	0.0684566	0.0611647
P1H09	P1	H09	-0.174061	-0.139261	-0.156661	-0.160897	-0.151912	-0.132044	-0.141978	-0.14927	-0.0887119	-0.0867366	-0.0877243	-0.0950162	-0.0135941	-0.0130625	-0.0133283	-0.0175644	0.0217127	0.0176327	0.0196727	0.0154366	0.0170134	0.0396015	0.0283074	0.0210155	0.052783	0.0452268	0.0490049	0.0447688	0.06358	0.0580553	0.0608176	0.0535257
P1H10	P1	H10	-0.201976	-0.163638	-0.182807	-0.187043	-0.0260836	-0.0236929	-0.0248883	-0.0321802	-0.0066268	-0.00626135	-0.00644408	-0.013736	0.00736231	0.0150678	0.0112151	0.00697897	0.0095986	0.0224905	0.0160445	0.0118084	0.0188542	0.0112543	0.0150542	0.00776234	0.0322889	0.0265317	0.0294103	0.0251742	0.0372385	0.0374367	0.0373376	0.0300457
P1H11	P1	H11	-0.0241586	-0.0171122	-0.0206354	-0.0248715	-0.00234002	-0.011681	-0.00701052	-0.0143024	0.015853	0.0250157	0.0204344	0.0131425	0.0212295	0.0170766	0.0191531	0.0149169	0.0390812	0.0419034	0.0404923	0.0362562	0.0450324	0.0391777	0.042105	0.0348131	0.0706278	0.0653081	0.0679679	0.0637318	0.0576746	0.0575255	0.0576001	0.0503082
P1H12	P1	H12	-0.189658	-0.129825	-0.159742	-0.163978	-0.140165	-0.125587	-0.132876	-0.140168	-0.150186	-0.132158	-0.141172	-0.148464	-0.00354834	-0.00365566	-0.003602	-0.00783811	0.0219628	0.0248323	0.0233975	0.0191614	0.0318763	0.0427399	0.0373081	0.0300162	0.0727604	0.0644071	0.0685837	0.0643476	0.0571141		0.0571141	0.0498222
P2A01	P2	A01	-0.0718827	-0.0656769	-0.0687798	-0.0657044	-0.0239393	-0.042522	-0.0332307	-0.0382458	-0.0189904	-0.016553	-0.0177717	-0.0227869	8.29439e-05	-0.00706681	-0.00349193	-0.000416553	0.0125803	0.0149599	0.0137701	0.0168455	0.031755	0.032235	0.031995	0.0269798	0.0338789	0.0367283	0.0353036	0.038379	0.0547022	0.0354849	0.0450935	0.0400784
P2A02	P2	A02
P2A03	P2	A03	-0.102433	-0.0948126	-0.098623	-0.0955476	-0.0422803	-0.0465226	-0.0444015	-0.0494166	-0.0178594	-0.0283458	-0.0231026	-0.0281178	-0.00334156	-0.00153036	-0.00243596	0.000639421	0.0145849	0.0025014	0.00854314	0.0116185	0.0180211	0.0255821	0.0218016	0.0167864	0.0386294	0.0382395	0.0384345	0.0415098	0.0481027	0.0490533	0.048578	0.0435629
P2A04	P2	A04	-0.082298	-0.0786806	-0.0804893	-0.0774139	-0.0418972	-0.0400637	-0.0409805	-0.0459956	-0.0217928	-0.0259533	-0.023873	-0.0288882	-0.0104041	-0.00187491	-0.00613949	-0.00306411	0.000521487	-0.00155041	-0.000514463	0.00256092	0.032053	0.0460615	0.0390572	0.0340421	0.0438278	0.0405283	0.0421781	0.0452534	0.0537299	0.0466419	0.0501859	0.0451707
P2A05	P2	A05	-0.0792816	-0.070782	-0.0750318	-0.0719564	-0.0419594	-0.0400298	-0.0409946	-0.0460097	-0.0207605	-0.0348143	-0.0277874	-0.0328025	-0.0103857	-0.00599099	-0.00818835	-0.00511297	-0.0113282	-0.0056849	-0.00850655	-0.00543116	0.00719097	0.0221786	0.0146848	0.00966961	0.050735	0.0376592	0.0441971	0.0472725	0.0484979	0.0320235	0.0402607	0.0352456
P2A06	P2	A06	-0.0935653	-0.0893309	-0.0914481	-0.0883728	-0.0464234	-0.0485014	-0.0474624	-0.0524775	-0.0307357	-0.0366667	-0.0337012	-0.0387163	-0.00294061	-0.000762125	-0.00185137	0.00122401	0.0048693	0.00114699	0.00300815	0.00608353	0.0137815	-0.015473	-0.000845742	-0.00586089	0.0357865	0.0226214	0.029204	0.0322793	0.0438306	0.0383154	0.041073	0.0360578
P2A07	P2	A07	-0.0459327	-0.0382398	-0.0420863	-0.0390109	-0.0409149	-0.0350161	-0.0379655	-0.0429807	-0.0437877	-0.0421683	-0.042978	-0.0479932	-0.0130942	-0.0299112	-0.0215027	-0.0184273	0.0212059	0.0171914	0.0191986	0.022274	0.0347843	0.0404596	0.037622	0.0326068	0.0585861	0.0683327	0.0634594	0.0665348	0.0707918	0.0746475	0.0727197	0.0677045
P2A08	P2	A08	-0.0358525	-0.0411312	-0.0384918	-0.0354165	-0.0240094	-0.0246194	-0.0243144	-0.0293295	-0.0246605	-0.0285503	-0.0266054	-0.0316205	-0.000677978	-0.00883338	-0.00475568	-0.0016803
P2A09	P2	A09	-0.030484	-0.0375177	-0.0340009	-0.0309255	-0.0163002	-0.01579	-0.0160451	-0.0210603	-0.024613	-0.0281436	-0.0263783	-0.0313934	-0.00269357		-0.00269357	0.000381809	-0.00356795	-0.0257127	-0.0146403	-0.0115649	0.0471812	0.0458823	0.0465317	0.0415166	0.0797465	0.0591026	0.0694246	0.0725	0.0833107	0.0533702	0.0683405	0.0633253
P2A10	P2	A10	-0.0339032	-0.0333497	-0.0336265	-0.0305511	-0.047751	-0.0312154	-0.0394832	-0.0444983	-0.0604504	-0.0619248	-0.0611876	-0.0662027	-0.0428535	-0.0533952	-0.0481244	-0.045049	-0.0521006	-0.0628857	-0.0574931	-0.0544178	-0.0618684	-0.0751978	-0.0685331	-0.0735483	-0.0878066	-0.0672304	-0.0775185	-0.0744431	-0.0982822	-0.232451	-0.165366	-0.170382
P2A11	P2	A11	-0.0588838	-0.052854	-0.0558689	-0.0527935	-0.016942	-0.0277481	-0.0223451	-0.0273602	-0.00860086	0.00282114	-0.00288986	-0.00790501	0.0129813	0.0160615	0.0145214	0.0175968	0.00957668	0.0201902	0.0148835	0.0179588	0.0272329	0.0304606	0.0288467	0.0238316	0.0493026	0.0391347	0.0442186	0.047294	0.0728656	0.0599354	0.0664005	0.0613854
P2A12	P2	A12	-0.0643685		-0.0643685	-0.0612931	-0.0116657	-0.0140213	-0.0128435	-0.0178586	-0.0702945	0.00376556	-0.0332645	-0.0382796	-0.054493	-0.0728169	-0.063655	-0.0605796	-0.0807286	-0.0416611	-0.0611949	-0.0581195	-0.0200387	-0.0215272	-0.0207829	-0.0257981	-0.0878121	-0.0622885	-0.0750503	-0.0719749	-0.00521436	-0.00902045	-0.00711741	-0.0121326
P2B01	P2	B01	-0.0873159	-0.087904	-0.0876099	-0.0845346	-0.0433554	-0.0600724	-0.0517139	-0.0567291	-0.0193097	-0.0377452	-0.0285275	-0.0335426	-0.0139358	-0.00822697	-0.0110814	-0.00800601	0.00451752	-0.00224411	0.0011367	0.00421209	0.0334779	0.00786411	0.020671	0.0156559	0.0406383	0.0363729	0.0385056	0.041581	0.0707904	0.0648737	0.0678321	0.0628169
P2B02	P2	B02	-0.100717	-0.0980218	-0.0993692	-0.0962938	-0.0487926	-0.0577777	-0.0532851	-0.0583003	-0.0391029	-0.0419077	-0.0405053	-0.0455204	-0.0107049	-0.014165	-0.012435	-0.0093596	0.00148461	-0.0155921	-0.00705373	-0.00397835	0.00719878	0.0114905	0.00934463	0.00432948	0.0335702	0.0404725	0.0370213	0.0400967	0.0522079	0.0431449	0.0476764	0.0426612
P2B03	P2	B03	-0.0741244	-0.0659816	-0.070053	-0.0669776	-0.0424572	-0.0485834	-0.0455203	-0.0505355	-0.0201556	-0.033696	-0.0269258	-0.031941	-0.0088717	-0.0126485	-0.0107601	-0.00768472	-0.00576476	-0.0109299	-0.00834732	-0.00527193	0.00549427	0.0098338	0.00766403	0.00264888	0.0254546	0.0218136	0.0236341	0.0267095	0.0486776	0.044669	0.0466733	0.0416581
P2B04	P2	B04	-0.103223	-0.0930749	-0.0981487	-0.0950734	-0.0579799	-0.0612483	-0.0596141	-0.0646293	-0.0445793	-0.0395668	-0.042073	-0.0470882	-0.0199392	-0.0267562	-0.0233477	-0.0202723	-0.00499254	-0.0191649	-0.0120787	-0.00900332	0.00945447	0.00570742	0.00758095	0.0025658	0.023434	0.0120701	0.017752	0.0208274	0.0416244	0.0350639	0.0383441	0.033329
P2B05	P2	B05	-0.074875	-0.0688729	-0.0718739	-0.0687985	-0.0528799	-0.0561539	-0.0545169	-0.0595321	-0.0323714	-0.0396423	-0.0360069	-0.041022	-0.035748	-0.0145003	-0.0251241	-0.0220487	-0.0190614	-0.0143959	-0.0167287	-0.0136533	-0.0035601	-0.00633175	-0.00494592	-0.00996107	0.0138035	0.0174298	0.0156167	0.0186921	0.0307696	0.0167754	0.0237725	0.0187573
P2B06	P2	B06	-0.096461	-0.0876849	-0.092073	-0.0889976	-0.0538864	-0.0610955	-0.0574909	-0.0625061	-0.0337606	-0.0429328	-0.0383467	-0.0433618	-0.0234354	-0.0119521	-0.0176938	-0.0146184	-0.00867396	0.00202925	-0.00332236	-0.000246974	-0.00364867	0.0119229	0.00413713	-0.000878023	0.0304616	0.0254856	0.0279736	0.031049	0.0471352	0.0395336	0.0433344	0.0383192
P2B07	P2	B07	-0.0442342	-0.0356574	-0.0399458	-0.0368704	-0.0192042	-0.0160232	-0.0176137	-0.0226289	-0.0319481	-0.0266104	-0.0292792	-0.0342944	-0.016116	-0.0176582	-0.0168871	-0.0138117	-0.0176413	-0.0185644	-0.0181029	-0.0150275	0.0215201	0.0275296	0.0245249	0.0195097	0.0584331	0.0536618	0.0560474	0.0591228	0.0683299	0.0659089	0.0671194	0.0621043
P2B08	P2	B08	-0.037221	-0.0276276	-0.0324243	-0.0293489	-0.0372841	-0.0293338	-0.033309	-0.0383241	-0.0506792	-0.0391802	-0.0449297	-0.0499449	-0.0312715	-0.0373415	-0.0343065	-0.0312311	-0.0453995	-0.0420259	-0.0437127	-0.0406373	0.00321869	0.00553203	0.00437536	-0.000639792	0.0137435	0.0058142	0.00977883	0.0128542	0.0222577	0.0128403	0.017549	0.0125338
P2B09	P2	B09	-0.0437516	-0.0373535	-0.0405525	-0.0374772	-0.0406407	-0.0229851	-0.0318129	-0.0368281	-0.0540688	-0.043435	-0.0487519	-0.053767	0.140896	0.160724	0.15081	0.153886	0.153002	0.149294	0.151148	0.154223	0.132511	0.142735	0.137623	0.132608	0.162224	0.13904	0.150632	0.153707	0.172001	0.167083	0.169542	0.164527
P2B10	P2	B10	-0.0426015	-0.0364579	-0.0395297	-0.0364543	-0.0361761	-0.0320596	-0.0341178	-0.039133	-0.0417013	-0.0349475	-0.0383244	-0.0433396	-0.0170054	-0.0366807	-0.0268431	-0.0237677	-0.0266128	-0.0464016	-0.0365072	-0.0334318	-0.038973	-0.0335695	-0.0362713	-0.0412864	-0.0230142	-0.0332843	-0.0281493	-0.0250739	-0.0145962	-0.0165617	-0.0155789	-0.0205941
P2B11	P2	B11	-0.0606541	-0.0648812	-0.0627677	-0.0596923	-0.0108174	-0.0102331	-0.0105253	-0.0155404	-0.0044437	-0.0127963	-0.00861999	-0.0136351	0.00827656	0.0149519	0.0116143	0.0146896	0.0179505	0.017296	0.0176233	0.0206987	0.0230363	0.0216322	0.0223343	0.0173191	0.0523583	0.0392816	0.04582	0.0488953	0.0686868	0.0533669	0.0610269	0.0560117
P2B12	P2	B12	-0.0350868	-0.0414478	-0.0382673	-0.0351919	-0.0300571	-0.0373371	-0.0336971	-0.0387122	-0.0309938	-0.0238773	-0.0274356	-0.0324507	-0.00424512	-0.0168231	-0.0105341	-0.00745873	-0.000605195	-0.00519729	-0.00290124	0.000174141	0.0134489	0.0192945	0.0163717	0.0113566	0.044518	0.0298281	0.0371731	0.0402484	0.0712189	0.0510771	0.061148	0.0561328
P2C01	P2	C01	-0.0976653	-0.0982681	-0.0979667	-0.0948913	-0.0519987	-0.0530881	-0.0525434	-0.0575585	-0.0335936	-0.036078	-0.0348358	-0.039851	-0.0167453	-0.00519182	-0.0109686	-0.00789318	-0.00719864	-0.00329135	-0.005245	-0.00216961	0.0154647	0.0208007	0.0181327	0.0131175	0.0231762	0.0269858	0.025081	0.0281564	0.0401724	0.0311301	0.0356512	0.0306361
P2C02	P2	C02	-0.101576	-0.101553	-0.101565	-0.0984893	-0.0647466	-0.0659575	-0.0653521	-0.0703672	-0.0221945	-0.0472117	-0.0347031	-0.0397183	-0.0354079	-0.0336367	-0.0345223	-0.0314469	-0.00715666	-0.00487372	-0.00601519	-0.00293981	0.0211079	0.0159567	0.0185323	0.0135171	0.0425869	0.035338	0.0389625	0.0420378	0.0525514	0.0407064	0.0466289	0.0416137
P2C03	P2	C03	-0.104432	-0.0928401	-0.0986359	-0.0955605	-0.0497531	-0.0536831	-0.0517181	-0.0567333	-0.0410084	-0.0379038	-0.0394561	-0.0444713	-0.0211553	-0.0294352	-0.0252952	-0.0222199	-0.0231009	-0.023114	-0.0231074	-0.0200321	-0.00534969	-0.00200439	-0.00367704	-0.00869219	0.0222542	0.0174268	0.0198405	0.0229159	0.0514261	0.0450032	0.0482147	0.0431995
P2C04	P2	C04	-0.0776125	-0.0733538	-0.0754832	-0.0724078	-0.0451935	-0.0411625	-0.043178	-0.0481931	-0.0271997	-0.029434	-0.0283168	-0.033332	-0.0316587	-0.0156065	-0.0236326	-0.0205572	0.00177846	-0.0120189	-0.0051202	-0.00204482	0.0143468	0.00840772	0.0113772	0.00636209	0.0262344	0.0145618	0.0203981	0.0234735	0.0400473	0.0330168	0.0365321	0.0315169
P2C05	P2	C05	-0.093208	-0.0945378	-0.0938729	-0.0907975	-0.056052	-0.0491292	-0.0525906	-0.0576057	-0.00457422	-0.016689	-0.0106316	-0.0156467	-0.0091892	-0.00578587	-0.00748753	-0.00441215	-0.0157161	-0.0103923	-0.0130542	-0.00997886	0.00769365	-0.0117771	-0.0020417	-0.00705685	0.014975	0.00189608	0.00843554	0.0115109	0.0111396	0.00383179	0.00748568	0.00247053
P2C06	P2	C06	-0.101946	-0.0902223	-0.0960842	-0.0930088	-0.054664	-0.0567725	-0.0557182	-0.0607334	-0.0344293	-0.034362	-0.0343956	-0.0394108	-0.0169315	-0.0111695	-0.0140505	-0.0109751	-0.0139045	-0.0129245	-0.0134145	-0.0103391	0.00984547	0.0197851	0.0148153	0.00980012	0.0360751	0.031154	0.0336146	0.0366899	0.0479832	0.0310544	0.0395188	0.0345036
P2C07	P2	C07	-0.0425873	-0.0359995	-0.0392934	-0.036218	-0.0426911	-0.0303248	-0.036508	-0.0415231	-0.0574637	-0.0464941	-0.0519789	-0.056994	-0.0424062	-0.0352986	-0.0388524	-0.035777	-0.0435959	-0.0540836	-0.0488397	-0.0457644	-0.0301618	-0.0242963	-0.027229	-0.0322442	0.0319021	0.0315152	0.0317087	0.0347841	0.0732613	0.0650319	0.0691466	0.0641315
P2C08	P2	C08	-0.0409354	-0.0436059	-0.0422707	-0.0391953	-0.0371542	-0.0316361	-0.0343952	-0.0394103	-0.0472871	-0.0469143	-0.0471007	-0.0521159	-0.0397605	-0.0494991	-0.0446298	-0.0415544	-0.0440276	-0.0610215	-0.0525245	-0.0494491	-0.0404282	-0.0344069	-0.0374175	-0.0424327	0.022972	0.0122029	0.0175874	0.0206628	0.0526288	0.0487189	0.0506738	0.0456587
P2C09	P2	C09	-0.0449667	-0.0376025	-0.0412846	-0.0382092	-0.0376463	-0.0314706	-0.0345585	-0.0395736	-0.0456428	-0.0412331	-0.0434379	-0.0484531	-0.0376867	-0.0433991	-0.0405429	-0.0374675	-0.0442609	-0.0613959	-0.0528284	-0.049753	-0.0508211	-0.0362702	-0.0435456	-0.0485608	-0.0262672	-0.0359672	-0.0311172	-0.0280418	0.00110775	-0.0019398	-0.000416024	-0.00543117
P2C10	P2	C10	-0.038674	-0.040333	-0.0395035	-0.0364281	-0.0380268	-0.0374419	-0.0377344	-0.0427495	-0.0383426	-0.0329557	-0.0356492	-0.0406643	0.00915196	0.00525237	0.00720216	0.0102775	0.0120103	0.0095045	0.0107574	0.0138328	0.0353227	0.0346559	0.0349893	0.0299741	0.0563041	0.0422851	0.0492946	0.05237	0.0735244	0.0645841	0.0690543	0.0640391
P2C11	P2	C11	-0.0330491	-0.0196102	-0.0263297	-0.0232543	-0.0256718	-0.0193265	-0.0224992	-0.0275143	0.00268519	-0.00439594	-0.000855379	-0.00587053	-0.000142274	-0.0147793	-0.00746081	-0.00438543	0.0227185	0.0066703	0.0146944	0.0177698	0.0138119	0.0268344	0.0203232	0.015308	0.0422362	0.0360327	0.0391345	0.0422099	0.0456222	0.0413549	0.0434886	0.0384734
P2C12	P2	C12	-0.0373963	-0.04608	-0.0417381	-0.0386628	-0.0454162	-0.0363384	-0.0408773	-0.0458924	-0.0494688	-0.0482089	-0.0488389	-0.053854	-0.0314352	-0.0470765	-0.0392558	-0.0361804	0.0249462	0.00972145	0.0173339	0.0204092	0.0192963	0.0139151	0.0166057	0.0115905	0.0480821	0.0302154	0.0391487	0.0422241	0.0527142	0.051475	0.0520946	0.0470795
P2D01	P2	D01	-0.0942717	-0.0958338	-0.0950527	-0.0919774	0.0820542	0.0722016	0.0771279	0.0721127	0.0875941	0.0698271	0.0787106	0.0736954	0.0805704	0.0792645	0.0799174	0.0829928	0.0893231	0.0806632	0.0849931	0.0880685	0.110066	0.0969224	0.103494	0.098479	0.106824	0.113992	0.110408	0.113483	0.143118	0.132339	0.137729	0.132714
P2D02	P2	D02	-0.109685	-0.100661	-0.105173	-0.102098	-0.0663787	-0.0672207	-0.0667997	-0.0718149	-0.0471569	-0.0558486	-0.0515027	-0.0565179	-0.0434189	-0.0408321	-0.0421255	-0.0390501	-0.019159	-0.0359043	-0.0275316	-0.0244563	-0.0238667	-0.0185672	-0.021217	-0.0262321	0.00679277	0.0132278	0.0100103	0.0130857	0.0247359	0.0143784	0.0195572	0.014542
P2D03	P2	D03	-0.106025	-0.0972493	-0.101637	-0.0985617	-0.0276525	-0.0410772	-0.0343649	-0.03938	-0.0208404	-0.0264746	-0.0236575	-0.0286726	-0.0133211	-0.0155176	-0.0144193	-0.0113439	0.000106023	-0.00323247	-0.00156322	0.00151216	-0.00335242	0.00130246	-0.00102498	-0.00604013	0.00833212	7.03617e-05	0.00420124	0.00727662	0.0306055	0.0189536	0.0247796	0.0197644
P2D04	P2	D04	-0.00360737	-0.000169001	-0.00188819	0.0011872	0.00565653	0.00388441	0.00477047	-0.00024468	0.00340131	0.00643746	0.00491938	-9.57659e-05	-0.00265879	0.00053268	-0.00106306	0.00201233	-0.00747813	-0.0077381	-0.00760812	-0.00453274	-0.00203492	0.00984582	0.00390545	-0.0011097	0.00475238	-0.00823672	-0.00174217	0.00133321	0.00843544	0.00449515	0.00646529	0.00145014
P2D05	P2	D05	-0.0956954	-0.100527	-0.0981114	-0.095036	-0.0343699	-0.0337989	-0.0340844	-0.0390996	-0.00880587	-0.0122299	-0.0105179	-0.015533	0.00846703	0.00170828	0.00508765	0.00816304	0.0151459	0.0113147	0.0132303	0.0163057	0.010139	0.0132801	0.0117095	0.00669439	0.0349764	0.0331351	0.0340557	0.0371311	0.0368178	0.040371	0.0385944	0.0335793
P2D06	P2	D06	-0.0900577	-0.0980378	-0.0940477	-0.0909724	-0.0488687	-0.0453414	-0.047105	-0.0521202	-0.012852	-0.0232524	-0.0180522	-0.0230673	-0.0114984	-0.0101115	-0.010805	-0.00772958	-0.00110333	-0.0106547	-0.00587903	-0.00280365	0.0173532	0.0181781	0.0177657	0.0127505	0.0343176	0.025415	0.0298663	0.0329417	0.0500179	0.0456393	0.0478286	0.0428135
P2D07	P2	D07	-0.0576308	-0.0521138	-0.0548723	-0.0517969	-0.058447	-0.0467537	-0.0526004	-0.0576155	-0.0615612	-0.063949	-0.0627551	-0.0677702
P2D08	P2	D08	-0.0503941	-0.0302295	-0.0403118	-0.0372364	-0.0381815	-0.029296	-0.0337387	-0.0387539	-0.0466233	-0.0334234	-0.0400233	-0.0450385	-0.0437758	-0.0391238	-0.0414498	-0.0383744	-0.0449278	-0.0403131	-0.0426205	-0.0395451	-0.0271718	-0.0116444	-0.0194081	-0.0244233	0.0134225	0.0060309	0.00972672	0.0128021	0.042755	0.0435869	0.043171	0.0381558
P2D09	P2	D09	-0.056696	-0.0489767	-0.0528363	-0.049761	-0.0368308	-0.0288373	-0.032834	-0.0378492	-0.0362411	-0.0382257	-0.0372334	-0.0422486	-0.0368485	-0.0510976	-0.0439731	-0.0408977	-0.0203736	-0.01801	-0.0191918	-0.0161164	-0.00160966	0.00390052	0.00114543	-0.00386972	0.0409218	0.0353339	0.0381279	0.0412032	0.0503828	0.0477096	0.0490462	0.044031
P2D10	P2	D10	-0.0487994	-0.0404735	-0.0446364	-0.0415611	-0.0450313	-0.0272771	-0.0361542	-0.0411694	-0.0451293	-0.0288925	-0.0370109	-0.042026	-0.0208354	-0.0263927	-0.0236141	-0.0205387	0.00279015	-0.0187159	-0.00796289	-0.00488751	0.00281621	-0.00246107	0.000177567	-0.00483758	0.0297168	0.00884769	0.0192823	0.0223577	0.0375909	0.0443668	0.0409789	0.0359637
P2D11	P2	D11	-0.067278	-0.0577031	-0.0624905	-0.0594152	-0.0216141	-0.0305253	-0.0260697	-0.0310849	-0.0220915	-0.0134985	-0.017795	-0.0228101	-0.00573911	-0.00885726	-0.00729819	-0.00422281	-0.00465964	0.00661412	0.00097724	0.00405262	0.00282935	-0.00195868	0.000435335	-0.00457982	0.0289389	0.0308226	0.0298808	0.0329562	0.0463574	0.0368353	0.0415963	0.0365812
P2D12	P2	D12	-0.0380909	-0.0497851	-0.043938	-0.0408626	-0.0370951	-0.0347356	-0.0359154	-0.0409305	-0.0476822	-0.0591233	-0.0534027	-0.0584179	-0.0243848	-0.0403177	-0.0323512	-0.0292759	-0.00885879	-0.0255862	-0.0172225	-0.0141471	0.0425052	0.0380642	0.0402847	0.0352696	0.0727024	0.0508475	0.0617749	0.0648503	0.0730735	0.0571916	0.0651325	0.0601174
P2E01	P2	E01	-0.103399	-0.103409	-0.103404	-0.100329	-0.0506156	-0.0551274	-0.0528715	-0.0578867	-0.0412527	-0.0436738	-0.0424633	-0.0474784	-0.0360818	-0.0343147	-0.0351983	-0.0321229	-0.0204204	-0.0141424	-0.0172814	-0.014206	0.000214958	0.000483232	0.000349095	-0.00466606	0.00961498	0.00600552	0.00781025	0.0108856
P2E02	P2	E02	-0.0904128	-0.0970145	-0.0937137	-0.0906383	-0.0135196	-0.0229017	-0.0182107	-0.0232258	-0.0065142	-0.011692	-0.00910309	-0.0141182	-0.00842802	-0.00639953	-0.00741377	-0.00433839	0.00714344	0.00714041	0.00714192	0.0102173	0.0233637	0.0212238	0.0222938	0.0172786	0.0340337	0.0333885	0.0337111	0.0367865	0.0460318	0.045009	0.0455204	0.0405053
P2E03	P2	E03	-0.102985	-0.107968	-0.105477	-0.102401	-0.052298	-0.0537816	-0.0530398	-0.0580549	-0.0323591	-0.0321828	-0.0322709	-0.0372861	-0.0161517	-0.0131186	-0.0146351	-0.0115597	-0.00321694	-0.00408028	-0.00364861	-0.000573229	0.00919961	0.00522589	0.00721275	0.0021976	0.0161019	0.00406162	0.0100818	0.0131571	0.0351994	0.0211352	0.0281673	0.0231521
P2E04	P2	E04	-0.104379	-0.108845	-0.106612	-0.103537	-0.0482844	-0.0495057	-0.0488951	-0.0539102	-0.0297793	-0.0293673	-0.0295733	-0.0345884	-0.0321793	-0.0184164	-0.0252979	-0.0222225	-0.00793277	-0.0098683	-0.00890054	-0.00582516	0.0173372	0.00679408	0.0120656	0.00705049	0.0235188	0.0322464	0.0278826	0.0309579	0.0433778	0.0433863	0.0433821	0.0383669
P2E05	P2	E05	-0.100077	-0.0970971	-0.0985872	-0.0955118	-0.0495716	-0.0478974	-0.0487345	-0.0537497	-0.0263484	-0.0292628	-0.0278056	-0.0328208	-0.0288048	-0.0240844	-0.0264446	-0.0233692	-0.0230396	-0.0343168	-0.0286782	-0.0256028	-0.00599705	-0.00765072	-0.00682389	-0.011839
P2E06	P2	E06	-0.0823636	-0.0768957	-0.0796297	-0.0765543	-0.0291402	-0.0219503	-0.0255452	-0.0305604	0.000849314	0.00225353	0.00155142	-0.00346373	-0.0054287	-0.000244342	-0.00283652	0.000238863	0.0142854	0.00813038	0.0112079	0.0142833	0.0234107	0.0167383	0.0200745	0.0150593	0.026907	0.0269393	0.0269232	0.0299986	0.0594204	0.0557357	0.057578	0.0525629
P2E07	P2	E07	-0.0384392	-0.0373757	-0.0379074	-0.0348321	-0.0326594	-0.0214637	-0.0270616	-0.0320767	-0.0191056	-0.0270568	-0.0230812	-0.0280964	-0.0176255	-0.0199317	-0.0187786	-0.0157032	-0.0142057	-0.023404	-0.0188049	-0.0157295	-0.00730084	-0.0086215	-0.00796117	-0.0129763
P2E08	P2	E08	-0.0502734	-0.0445999	-0.0474366	-0.0443613	-0.0358606	-0.0319165	-0.0338886	-0.0389037	-0.0424328	-0.0382727	-0.0403527	-0.0453679	-0.0414169	-0.0392952	-0.0403561	-0.0372807	-0.0407093	-0.0478004	-0.0442548	-0.0411795	-0.0299594	-0.0283248	-0.0291421	-0.0341572	0.0184954	0.0099172	0.0142063	0.0172817	0.0517973	0.0546723	0.0532348	0.0482197
P2E09	P2	E09	-0.0525141	-0.0368723	-0.0446932	-0.0416178	-0.0347667	-0.0330493	-0.033908	-0.0389232	-0.0173502	-0.0184488	-0.0178995	-0.0229147	-0.0212126	-0.0164359	-0.0188242	-0.0157488	-0.0195777	-0.0228123	-0.021195	-0.0181196	-0.0205813	0.000591682	-0.00999479	-0.0150099	-0.00502827	-0.0108458	-0.00793705	-0.00486167	0.0502261	0.0504831	0.0503546	0.0453395
P2E10	P2	E10	-0.0507215	-0.0333391	-0.0420303	-0.0389549	-0.0325361	-0.0294746	-0.0310053	-0.0360205	-0.0325516	-0.0320997	-0.0323257	-0.0373408	6.38552e-05	0.00755944	0.00381165	0.00688703	0.0287735	0.0159751	0.0223743	0.0254497	0.0276885	0.039427	0.0335577	0.0285426	0.0504905	0.0348502	0.0426703	0.0457457	0.0629697	0.0636735	0.0633216	0.0583065
P2E11	P2	E11	-0.0617054	-0.0499573	-0.0558314	-0.052756	-0.050566	-0.0425641	-0.0465651	-0.0515802	-0.0200868	-0.0200843	-0.0200855	-0.0251007	-0.0126462	-0.0113511	-0.0119987	-0.00892327	-0.000343791	-0.0034037	-0.00187374	0.00120164	0.00654463	0.0108704	0.00870751	0.00369235	0.0260142	0.0190745	0.0225443	0.0256197	0.0411947	0.0427554	0.041975	0.0369599
P2E12	P2	E12	-0.0492447	-0.0515496	-0.0503972	-0.0473218	-0.042794	-0.0293446	-0.0360693	-0.0410845	-0.0433409	-0.0517622	-0.0475516	-0.0525667	-0.0347254	-0.0439688	-0.0393471	-0.0362717	-0.0333335	-0.0569131	-0.0451233	-0.0420479	-0.0417695	-0.0265736	-0.0341715	-0.0391867	-0.00654637	-0.0217056	-0.014126	-0.0110506	0.00996739	0.015061	0.0125142	0.00749903
P2F01	P2	F01	-0.0992672	-0.107758	-0.103512	-0.100437	-0.04824	-0.0633042	-0.0557721	-0.0607873	-0.0377032	-0.0389382	-0.0383207	-0.0433358	-0.0276523	-0.0270579	-0.0273551	-0.0242797	-0.0141593	-0.015461	-0.0148102	-0.0117348	0.00222329	0.00609063	0.00415696	-0.000858187	0.0179021	0.0229414	0.0204218	0.0234972		0.0230428	0.0230428	0.0180277
P2F02	P2	F02	-0.0963923	-0.0971373	-0.0967648	-0.0936894	-0.0599648	-0.0496079	-0.0547863	-0.0598015	-0.0287753	-0.0322818	-0.0305285	-0.0355437	-0.019619	-0.0187598	-0.0191894	-0.016114	-0.00428322	-0.0123219	-0.00830255	-0.00522716	0.00418602	0.000161212	0.00217362	-0.00284153	0.00882025	0.0043617	0.00659097	0.00966636	0.0182774	0.0132467	0.0157621	0.0107469
P2F03	P2	F03	-0.0751964	-0.0710003	-0.0730983	-0.0700229	-0.0323365	-0.0427311	-0.0375338	-0.042549	-0.0305042	-0.0307527	-0.0306285	-0.0356436	-0.0232242	-0.0267102	-0.0249672	-0.0218918	-0.0215695	-0.0124941	-0.0170318	-0.0139564	0.00295626	0.0113928	0.00717453	0.00215938	0.00581911	0.00856734	0.00719323	0.0102686	0.0370622	0.0405485	0.0388053	0.0337902
P2F04	P2	F04	-0.0915644	-0.0809013	-0.0862329	-0.0831575	-0.0330445	-0.0350099	-0.0340272	-0.0390423	-0.0121377	-0.0154146	-0.0137762	-0.0187913	-0.00663178	-0.00341489	-0.00502333	-0.00194795	0.000372768	-0.00132392	-0.000475574	0.00259981	0.00131346	0.00993898	0.00562622	0.000611069	0.0111302	0.0128569	0.0119935	0.0150689	0.0342916	0.0308567	0.0325741	0.027559
P2F05	P2	F05	-0.0906575	-0.100181	-0.0954194	-0.092344	-0.045228	-0.0414086	-0.0433183	-0.0483335	-0.0196951	-0.0298621	-0.0247786	-0.0297937	-0.0224385	-0.0195525	-0.0209955	-0.0179201	-0.0112009	-0.0161687	-0.0136848	-0.0106094	0.00629423	0.00304777	0.004671	-0.000344148	0.00258313	0.00367632	0.00312973	0.00620511	0.0297893	0.0312722	0.0305307	0.0255156
P2F06	P2	F06	-0.0467643	-0.0479864	-0.0473754	-0.0443	-0.0394111	-0.032096	-0.0357536	-0.0407687	-0.059185	-0.0471913	-0.0531881	-0.0582033	-0.0527505	-0.0579878	-0.0553691	-0.0522937	-0.060686	-0.0985492	-0.0796176	-0.0765422	-0.047053	-0.0572865	-0.0521698	-0.0571849	-0.0602492	-0.108733	-0.0844911	-0.0814157	-0.0879049	-0.0616782	-0.0747916	-0.0798067
P2F07	P2	F07	-0.0482292	-0.0436549	-0.045942	-0.0428667	-0.0392445	-0.0332718	-0.0362582	-0.0412733	-0.0375548	-0.0382991	-0.037927	-0.0429421	0.120363	0.104504	0.112434	0.115509	0.118325	0.103444	0.110885	0.11396	0.12256	0.120128	0.121344	0.116329	0.15393	0.119104	0.136517	0.139592	0.17442	0.200747	0.187583	0.182568
P2F08	P2	F08	-0.0357744	-0.0409184	-0.0383464	-0.035271	-0.040304	-0.0313005	-0.0358022	-0.0408174	-0.0496091	-0.044748	-0.0471786	-0.0521937	-0.036008	-0.0541133	-0.0450606	-0.0419853	-0.0336309	-0.0502137	-0.0419223	-0.0388469	-0.0331231	-0.041441	-0.037282	-0.0422972	0.0206986	0.0178212	0.0192599	0.0223353		0.0447989	0.0447989	0.0397837
P2F09	P2	F09	-0.0454453	-0.0377832	-0.0416143	-0.0385389	-0.0408238	-0.0298458	-0.0353348	-0.04035	-0.0493641	-0.0411065	-0.0452353	-0.0502504	-0.0264621	-0.0338386	-0.0301503	-0.027075	-0.0245796	-0.0433225	-0.033951	-0.0308757	-0.0147228	-0.0121207	-0.0134217	-0.0184369	0.0170117	-0.0135071	0.00175231	0.00482769	0.0662344	0.0701203	0.0681774	0.0631622
P2F10	P2	F10	-0.0504198	-0.0411312	-0.0457755	-0.0427001	-0.0334685	-0.0342501	-0.0338593	-0.0388745	-0.0369086	-0.0451663	-0.0410375	-0.0460526	-0.0424304	-0.0502959	-0.0463632	-0.0432878
P2F11	P2	F11	-0.0658848	-0.056798	-0.0613414	-0.058266	-0.0355076	-0.0125532	-0.0240304	-0.0290455	-0.00139758	-0.0148371	-0.00811734	-0.0131325	-0.0071021	0.00121759	-0.00294225	0.000133129	-0.00804077	-0.0135538	-0.0107973	-0.00772192	0.0105729	0.019679	0.015126	0.0101108	0.043794	0.0256366	0.0347153	0.0377907	0.0571427	0.047074	0.0521084	0.0470932
P2F12	P2	F12	-0.0424453	-0.0460857	-0.0442655	-0.0411901	-0.0213354	-0.0301193	-0.0257273	-0.0307425	-0.0301039	-0.0284892	-0.0292965	-0.0343117	-0.0220528	-0.0163175	-0.0191851	-0.0161098	-0.00856783	-0.00883649	-0.00870216	-0.00562678	-0.00722398	0.00143202	-0.00289598	-0.00791113	0.00600419	0.00650047	0.00625233	0.00932771	0.0800747	0.071321	0.0756978	0.0706827
P2G01	P2	G01	-0.0859171	-0.089107	-0.087512	-0.0844366	-0.0424073	-0.0439223	-0.0431648	-0.04818	-0.0329932	-0.0360836	-0.0345384	-0.0395536	0.00127609	0.00694367	0.00410988	0.00718527	0.00811965	0.0126215	0.0103706	0.013446	0.0209877	0.0312268	0.0261073	0.0210921	0.0153494	0.027194	0.0212717	0.0243471	0.0396092	0.0390129	0.039311	0.0342959
P2G02	P2	G02	-0.094927	-0.105153	-0.10004	-0.0969644	-0.0447754	-0.0644735	-0.0546244	-0.0596396	-0.0356648	-0.0337382	-0.0347015	-0.0397167	-0.0224172	-0.0148431	-0.0186302	-0.0155548	0.00193345	0.000949329	0.00144139	0.00451677	0.0111111	0.0112407	0.0111759	0.00616076	0.0188413	0.0219969	0.0204191	0.0234945	0.0271633	0.0403904	0.0337769	0.0287617
P2G03	P2	G03	-0.077958	-0.0823385	-0.0801483	-0.0770729	-0.0367706	-0.0411882	-0.0389794	-0.0439945	-0.0257358	-0.0292736	-0.0275047	-0.0325199
P2G04	P2	G04	-0.0906016	-0.0928132	-0.0917074	-0.0886321	-0.0411145	-0.050563	-0.0458388	-0.0508539	-0.0288804	-0.03181	-0.0303452	-0.0353603	-0.00768468	-0.00432553	-0.00600511	-0.00292973	0.00525609	-0.00583854	-0.000291222	0.00278416	0.0232391	0.0261177	0.0246784	0.0196632	0.0174521	0.0262099	0.021831	0.0249064	0.0460995	0.0473406	0.0467201	0.0417049
P2G05	P2	G05	-0.0745667	-0.0756261	-0.0750964	-0.072021	-0.0456975	-0.0449263	-0.0453119	-0.0503271	-0.0229933	-0.0323159	-0.0276546	-0.0326697	-0.0143266	-0.00898151	-0.011654	-0.00857866	-0.000482295	-0.0131475	-0.00681491	-0.00373952	-0.00402592	0.0144984	0.00523625	0.000221102	0.0166642	0.015089	0.0158766	0.018952	0.0367085	0.0297438	0.0332261	0.028211
P2G06	P2	G06	-0.0709608	-0.0731215	-0.0720411	-0.0689657	-0.0386948	-0.037318	-0.0380064	-0.0430216	-0.0140933	-0.0236804	-0.0188869	-0.023902	-0.0173791	-0.0137576	-0.0155684	-0.012493	0.00241336	-0.00463666	-0.00111165	0.00196373	0.013879	0.0161124	0.0149957	0.00998052	0.0155867	0.0148169	0.0152018	0.0182772	0.027196	0.0390716	0.0331338	0.0281187
P2G07	P2	G07	-0.0390739	-0.0458065	-0.0424402	-0.0393648	-0.0348633	-0.0300893	-0.0324763	-0.0374915	-0.0367752	-0.031616	-0.0341956	-0.0392108	-0.0324808	-0.0293343	-0.0309076	-0.0278322	-0.0223186	-0.0409458	-0.0316322	-0.0285568	-0.0234496	-0.0258746	-0.0246621	-0.0296773
P2G08	P2	G08	-0.0358619	-0.0420715	-0.0389667	-0.0358913	-0.0360458	-0.0306356	-0.0333407	-0.0383558	-0.0468298	-0.047491	-0.0471604	-0.0521755	-0.0276144	-0.0174767	-0.0225456	-0.0194702	0.0171048	0.00696707	0.0120359	0.0151113	0.032576	0.0315015	0.0320388	0.0270236	0.0372812	0.0353078	0.0362945	0.0393699	0.060096	0.0654248	0.0627604	0.0577452
P2G09	P2	G09	-0.0426681	-0.0520091	-0.0473386	-0.0442632	-0.0352567	-0.0398897	-0.0375732	-0.0425883	-0.0376643	-0.0320115	-0.0348379	-0.039853	-0.0247642	-0.0352465	-0.0300053	-0.02693	-0.0245076	-0.0302174	-0.0273625	-0.0242871	-3.27108e-05	-0.01064	-0.00533633	-0.0103515	0.025714	0.00416187	0.0149379	0.0180133	0.0335959	0.0387428	0.0361693	0.0311542
P2G10	P2	G10	-0.0443631	-0.0441479	-0.0442555	-0.0411801	-0.0373564	-0.0369684	-0.0371624	-0.0421775	-0.0346476	-0.0421292	-0.0383884	-0.0434036	-0.0356461	-0.0291504	-0.0323982	-0.0293229	-0.0180118	-0.045173	-0.0315924	-0.028517	0.0207692	0.0249948	0.022882	0.0178668	0.0421241	0.0439637	0.0430439	0.0461193	0.0654734	0.0679092	0.0666913	0.0616762
P2G11	P2	G11	-0.0564216	-0.0570997	-0.0567607	-0.0536853	-0.0195499	-0.0250492	-0.0222996	-0.0273147	-0.0131537	-0.0166374	-0.0148955	-0.0199107	0.00274323	-0.00440933	-0.000833053	0.00224233	0.00440881	-0.00404261	0.000183102	0.00325848	0.0161903	0.0150567	0.0156235	0.0106084	0.0330794	0.0233986	0.028239	0.0313144	0.0420188	0.0399961	0.0410074	0.0359923
P2G12	P2	G12	-0.0490534	-0.0659643	-0.0575089	-0.0544335	-0.0242649	-0.0351174	-0.0296911	-0.0347063	-0.0131824	-0.0265225	-0.0198524	-0.0248676	-0.0511388	-0.0657268	-0.0584328	-0.0553574	-0.0548137	-0.0565882	-0.055701	-0.0526256	-0.0150276	-0.0289551	-0.0219914	-0.0270065	-0.0615459	-0.0615246	-0.0615352	-0.0584598	-0.0201562	-0.0140804	-0.0171183	-0.0221334
P2H01	P2	H01	-0.0877651	-0.106254	-0.0970095	-0.0939342	-0.0514501	-0.0585361	-0.0549931	-0.0600082	-0.0252176	-0.0225613	-0.0238895	-0.0289046	-0.0257275	-0.0229049	-0.0243162	-0.0212408	0.000152873	-0.0125342	-0.00619066	-0.00311528	0.0147484	0.0262508	0.0204996	0.0154844	0.0527816	0.0440514	0.0484165	0.0514919		-0.0169846	-0.0169846	-0.0219997
P2H02	P2	H02	-0.0763132	-0.0996095	-0.0879614	-0.084886	-0.0401446	-0.0464614	-0.043303	-0.0483181	-0.0341144	-0.0213738	-0.0277441	-0.0327593	-0.016351	-0.0201548	-0.0182529	-0.0151775	0.020048	-0.00129499	0.00937652	0.0124519	0.0291065	0.0232765	0.0261915	0.0211764	0.0386661	0.0344583	0.0365622	0.0396376	0.0454585	0.0405029	0.0429807	0.0379655
P2H03	P2	H03	-0.0918841	-0.112523	-0.102203	-0.0991281	-0.0481719	-0.0571754	-0.0526736	-0.0576888	-0.0307218	-0.042166	-0.0364439	-0.041459	-0.0191024	-0.0179474	-0.0185249	-0.0154495	-0.0068755	-0.0108757	-0.0088756	-0.00580022	0.0131616	0.00979586	0.0114787	0.00646358	0.0153545	0.0130248	0.0141897	0.017265	0.0267342	0.0167799	0.021757	0.0167419
P2H04	P2	H04	-0.0930162	-0.119473	-0.106245	-0.103169	-0.0493226	-0.0502568	-0.0497897	-0.0548048	-0.0282552	-0.0452586	-0.0367569	-0.041772	-0.023624	-0.0321696	-0.0278968	-0.0248214	0.00597899	-0.0166854	-0.00535322	-0.00227784	0.0212228	0.014726	0.0179744	0.0129592	0.0261702	0.0101333	0.0181518	0.0212271		0.0333943	0.0333943	0.0283792
P2H05	P2	H05	-0.0911492	-0.100398	-0.0957734	-0.092698	-0.0572566	-0.0480956	-0.0526761	-0.0576913	-0.0296715	-0.0312995	-0.0304855	-0.0355007	-0.0217914	-0.0224701	-0.0221308	-0.0190554	0.00745179	-0.00599425	0.000728773	0.00380415	0.0292179	0.02053	0.024874	0.0198588	0.0261696	0.0231894	0.0246795	0.0277549	0.0452836	0.0401215	0.0427026	0.0376874
P2H06	P2	H06	-0.0783435	-0.0881637	-0.0832536	-0.0801782	-0.0430351	-0.049173	-0.046104	-0.0511192	-0.0321479	-0.0395472	-0.0358476	-0.0408627	-0.0171497	-0.0243712	-0.0207604	-0.017685	-0.00118938	-0.0131655	-0.00717744	-0.00410206	0.00693781	0.0077934	0.0073656	0.00235045	0.0130833	0.0183497	0.0157165	0.0187919	0.0399787	0.0362633	0.038121	0.0331058
P2H07	P2	H07	-0.0365886	-0.0474877	-0.0420382	-0.0389628	-0.0347959	-0.0299677	-0.0323818	-0.037397	-0.0368145	-0.0479688	-0.0423916	-0.0474068	-0.033764	-0.0365751	-0.0351695	-0.0320941	-0.0363507	-0.057388	-0.0468694	-0.043794	-0.0281957	-0.0278318	-0.0280137	-0.0330289	0.0249928	0.0119101	0.0184514	0.0215268	0.0380137	0.036969	0.0374913	0.0324762
P2H08	P2	H08	-0.0410825	-0.0359275	-0.038505	-0.0354296	-0.0436537	-0.0363139	-0.0399838	-0.0449989	-0.0504075	-0.0487352	-0.0495713	-0.0545865	-0.0350248	-0.051696	-0.0433604	-0.040285	-0.0324797	-0.0425694	-0.0375246	-0.0344492	0.038421	0.0379118	0.0381664	0.0331512	0.06586	0.0685794	0.0672197	0.0702951	0.0786742	0.0985137	0.088594	0.0835788
P2H09	P2	H09	-0.0499049	-0.0485665	-0.0492357	-0.0461604	-0.0405851	-0.0433185	-0.0419518	-0.0469669	-0.0263079	-0.0234684	-0.0248882	-0.0299033	-0.0195627	-0.0235434	-0.0215531	-0.0184777	-0.0218786	-0.0358874	-0.028883	-0.0258076	-0.024726	-0.0360533	-0.0303897	-0.0354048	-0.0250179	-0.0340287	-0.0295233	-0.0264479	0.0241951	0.0237844	0.0239898	0.0189746
P2H10	P2	H10	-0.047535	-0.0621345	-0.0548347	-0.0517594	-0.0500983	-0.0584536	-0.054276	-0.0592911	-0.0674286	-0.0697855	-0.068607	-0.0736222	-0.0472995	-0.0571438	-0.0522217	-0.0491463	-0.0528859	-0.0635348	-0.0582104	-0.055135	-0.0495588	-0.045026	-0.0472924	-0.0523076	-0.0406674	-0.0379479	-0.0393077	-0.0362323	-0.0201711	-0.0247194	-0.0224453	-0.0274604
P2H11	P2	H11	-0.057272	-0.0549718	-0.0561219	-0.0530465	-0.0503268	-0.0456343	-0.0479805	-0.0529957	-0.000125634	-0.00903808	-0.00458186	-0.00959701	0.00508263	0.01282	0.00895132	0.0120267	0.023024	0.0211926	0.0221083	0.0251837	0.0373002	0.0404091	0.0388546	0.0338395	0.0754846	0.0540971	0.0647908	0.0678662	0.0675539	0.0644368	0.0659954	0.0609802
P2H12	P2	H12	-0.0393948	-0.04619	-0.0427924	-0.039717	-0.0480344	-0.0385531	-0.0432937	-0.0483089	-0.0559564	-0.0527011	-0.0543288	-0.0593439	-0.0381761	-0.0421761	-0.0401761	-0.0371007	-0.0200255	-0.0269958	-0.0235107	-0.0204353	-0.0163503	-0.0180561	-0.0172032	-0.0222183	0.0448326	0.044652	0.0447423	0.0478176	0.0592135	0.0545449	0.0568792	0.0518641
P3A01	P3	A01	-0.176394	-0.174813	-0.175604	-0.155909	-0.0762781	-0.0497109	-0.0629945	-0.0189272	0	-0.00261859	-0.00130929	0.042758	-0.0909789	0.0502857	-0.0203466	-0.000651503		0.00453773	0.00453773	0.0242328	-0.206134		-0.206134	-0.162066	0.0321289	0.0522152	0.0421721	0.0618672	0.088203	-0.033472	0.0273655	0.0714327
P3A02	P3	A02		-0.117999	-0.117999	-0.0983039	-0.0867092	-0.0746586	-0.0806839	-0.0366166	0	-0.0173947	-0.00869735	0.0353699	0.0108945	-0.00868653	0.00110397	0.0207991		0.0041721	0.0041721	0.0238672						0.0113721	0.0113721	0.0310672	0.223163	0.00010742	0.111635	0.155702
P3A03	P3	A03
P3A04	P3	A04		-0.103555	-0.103555	-0.0838595	-0.103092	-0.0967244	-0.0999082	-0.055841	-0.344561	-0.151972	-0.248267	-0.204199														0.0294185	0.0294185	0.0491136		0.0717727	0.0717727	0.11584
P3A05	P3	A05	-0.0301169	-0.0634014	-0.0467591	-0.027064	-0.0555698	-0.0389881	-0.047279	-0.00321173	-0.0207332	0.0086599	-0.00603663	0.0380306	0	0.0346986	0.0173493	0.0370444	0.13718	0.0795509	0.108366	0.128061						0.0188475	0.0188475	0.0385426
P3A06	P3	A06	0	-0.0581049	-0.0290525	-0.00935735	-0.0902379	-0.0534535	-0.0718457	-0.0277784	-0.00675122	0.0186542	0.00595149	0.0500187	0	0.052652	0.026326	0.0460211	0.145219	0.0779756	0.111597	0.131292
P3A07	P3	A07	-0.187638	-0.0417398	-0.114689	-0.0949939	-0.0471906	-0.0119694	-0.02958	0.0144872	-0.0247461	0.0295028	0.00237837	0.0464456	0	0.0648582	0.0324291	0.0521242	-0.0696164	0.0839495	0.00716654	0.0268616						0.0495604	0.0495604	0.0692555
P3A08	P3	A08	0	-0.062189	-0.0310945	-0.0113994	-0.111454	-0.0645869	-0.0880205	-0.0439532	-0.0380159	0.0144211	-0.0117974	0.0322699					-0.0483937		-0.0483937	-0.0286986						0.0461219	0.0461219	0.065817
P3A09	P3	A09	-0.121535	-0.0603852	-0.0909599	-0.0712648	-0.038549	-0.0267786	-0.0326638	0.0114034	-0.0760181	-0.040828	-0.0584231	-0.0143558					-0.0770138		-0.0770138	-0.0573187						0.0267137	0.0267137	0.0464088
P3A10	P3	A10	0	-0.0789374	-0.0394687	-0.0197736	-0.103779	0.00537118	-0.0492041	-0.00513686	0	-0.0473983	-0.0236992	0.0203681	0	-0.101767	-0.0508834	-0.0311883	-0.199799	-0.184462	-0.192131	-0.172436	-0.145454	-0.0240546	-0.0847544	-0.0406871	-0.0831963	-0.15507	-0.119133	-0.0994383	-0.0856138	-0.0213957	-0.0535047	-0.00943748
P3A11	P3	A11	0	-0.0580262	-0.0290131	-0.00931799	-0.102548	-0.11038	-0.106464	-0.0623968	0	0.0175482	0.00877411	0.0528414									-0.481818		-0.481818	-0.437751	0.0545971		0.0545971	0.0742922	-0.0701942		-0.0701942	-0.0261269
P3A12	P3	A12		0.0177031	0.0177031	0.0373982	-0.141255	-0.0782859	-0.10977	-0.0657032		-0.0139895	-0.0139895	0.0300777		-0.164579	-0.164579	-0.144884		-0.16056	-0.16056	-0.140865	0	-0.0231225	-0.0115613	0.032506	0	-0.114402	-0.0572008	-0.0375057
P3B01	P3	B01	-0.220021	-0.264841	-0.242431	-0.222736	-0.0658962	-0.0402194	-0.0530578	-0.00899057	-0.0456979	-0.0339009	-0.0397994	0.00426783	-0.000192995	-0.0368597	-0.0185264	0.00116874	0.0237807	-0.0163064	0.00373719	0.0234323	-0.00963349	0.00425789	-0.0026878	0.0413795	0.0742369	0.0439883	0.0591126	0.0788077		0	0	0.0440673
P3B02	P3	B02	-0.150585	-0.240828	-0.195707	-0.176011	-0.0817607	-0.0491063	-0.0654335	-0.0213663	-0.0589742	-0.0388714	-0.0489228	-0.00485555
P3B03	P3	B03	-0.196579	-0.260054	-0.228317	-0.208621	-0.141019	-0.0903959	-0.115708	-0.0716404	-0.0469785	-0.00440986	-0.0256942	0.0183731
P3B04	P3	B04	-0.27653	-0.252445	-0.264487	-0.244792	-0.08121	-0.0658121	-0.0735111	-0.0294438	-0.0509652	-0.0229399	-0.0369525	0.00711471
P3B05	P3	B05	-0.215713	-0.265356	-0.240535	-0.22084	-0.104747	-0.060571	-0.0826591	-0.0385919	-0.0622728	-0.0311056	-0.0466892	-0.00262194	-0.0519397		-0.0519397	-0.0322446
P3B06	P3	B06	-0.141683	-0.269219	-0.205451	-0.185756	-0.140303	-0.0884306	-0.114367	-0.0702994	-0.077799	-0.0572029	-0.0675009	-0.0234337	-0.0490708	-0.0159352	-0.032503	-0.0128079	0.0379896	0.00315155	0.0205706	0.0402657	-0.00414746	0.00235735	-0.000895055	0.0431722	0.0855585	0.0572751	0.0714168	0.0911119	0.0746644	0.0636054	0.0691349	0.113202
P3B07	P3	B07	-0.0794233	-0.0679381	-0.0736807	-0.0539856	-0.068009	-0.0450799	-0.0565445	-0.0124772	-0.0598165	-0.0187463	-0.0392814	0.00478586	-0.0165605	-0.0152991	-0.0159298	0.00376533	0.0275429	0.00380073	0.0156718	0.0353669	0.0122819	0.0151133	0.0136976	0.0577649	0.117451	0.0915215	0.104486	0.124182	0.098883	0.108365	0.103624	0.147691
P3B08	P3	B08	-0.0649156	-0.0801316	-0.0725236	-0.0528285	-0.111078	-0.0717909	-0.0914346	-0.0473673	-0.0582637	-0.0361174	-0.0471905	-0.00312327	-0.045451	-0.0117861	-0.0286186	-0.00892348	0.0190179	-0.00430903	0.00735445	0.0270496	0.0265408	0.0406907	0.0336158	0.077683	0.0703726	0.0430739	0.0567232	0.0764183	0.0900264	0.0800295	0.0850279	0.129095
P3B09	P3	B09	-0.0849115	-0.0836334	-0.0842725	-0.0645774	-0.0964793	-0.0707043	-0.0835918	-0.0395245	-0.0692302	-0.0603122	-0.0647712	-0.0207039	0.000915081	-0.00164906	-0.00036699	0.0193281	0.0758168	0.0473106	0.0615637	0.0812588	0.0654913	0.0454838	0.0554876	0.0995548
P3B10	P3	B10	-0.0899474	-0.0750102	-0.0824788	-0.0627837	-0.0852948	-0.0798785	-0.0825866	-0.0385194	-0.0889716	-0.0525987	-0.0707852	-0.0267179	0.141956	0.0870664	0.114511	0.134206	0.133978	0.109663	0.12182	0.141516	0.126475	0.153741	0.140108	0.184175	0.161332	0.126551	0.143941	0.163637	0.217805	0.21778	0.217793	0.26186
P3B11	P3	B11	-0.151477	-0.109061	-0.130269	-0.110574	-0.0988237	-0.11309	-0.105957	-0.0618896	-0.0404145	-0.0460587	-0.0432366	0.000830648	-0.041732	0.00924486	-0.0162436	0.00345153	0.0479056	0.0214465	0.034676	0.0543711	0.0227093	0.0174722	0.0200908	0.064158	0.0849674	0.080968	0.0829677	0.102663	0.0933669	0.086913	0.0901399	0.134207
P3B12	P3	B12	-0.0959109	-0.0830194	-0.0894652	-0.0697701	-0.0840053	-0.125919	-0.104962	-0.060895	-0.0765893	-0.0503932	-0.0634913	-0.019424	-0.0801492		-0.0801492	-0.0604541	-0.0662499		-0.0662499	-0.0465548		0.0107182	0.0107182	0.0547855	0		0	0.0196951
P3C01	P3	C01	0.0133056	0.00193824	0.00762191	0.027317	0.0586888	0.0683423	0.0635156	0.107583	0.083963	0.0690761	0.0765196	0.120587	0.0734262	0.0770181	0.0752222	0.0949173	0.124826	0.090878	0.107852	0.127547	0.0914655	0.0790388	0.0852521	0.129319	0.153245	0.103682	0.128464	0.148159		0	0	0.0440673
P3C02	P3	C02	-0.26266	-0.262021	-0.26234	-0.242645	-0.10513	-0.0924525	-0.0987911	-0.0547239	-0.0796541	-0.0404272	-0.0600407	-0.0159734	0.00376283	-0.0158984	-0.0060678	0.0136273	0.036549	0.00755688	0.022053	0.0417481	0.0128926	0.0117214	0.012307	0.0563743	0.0970936	0.0735946	0.0853441	0.105039
P3C03	P3	C03	-0.20319	-0.261646	-0.232418	-0.212723	-0.149979	-0.116163	-0.133071	-0.0890039	-0.0962565	-0.0396399	-0.0679482	-0.0238809	-0.0110534	-0.0301628	-0.0206081	-0.000912991	0.0332622	0.0129238	0.023093	0.0427881	0.00950519	0.0176728	0.013589	0.0576563	0.0834169	0.0473789	0.0653979	0.085093	0.0810111	0.0871583	0.0840847	0.128152
P3C04	P3	C04	-0.161816	-0.266879	-0.214348	-0.194652	-0.0850815	-0.0594484	-0.0722649	-0.0281977	-0.0462296	-0.0202924	-0.033261	0.0108063	0.0106244	-0.000398131	0.00511314	0.0248082	0.0722984	0.0409171	0.0566078	0.0763029	0.0309742	0.061669	0.0463216	0.0903889	0.126708	0.092936	0.109822	0.129517	0.100862	0.104989	0.102925	0.146993
P3C05	P3	C05	-0.276631	-0.106698	-0.191665	-0.171969	-0.106094	-0.10355	-0.104822	-0.0607545	-0.0886112	-0.047163	-0.0678871	-0.0238198	-0.0188328	-0.0191422	-0.0189875	0.000707615	0.0467959	0.00118349	0.0239897	0.0436848	-0.00684934	0.0169273	0.00503897	0.0491062	0.0761945	0.0624601	0.0693273	0.0890224	0.0523825	0.0730494	0.0627159	0.106783
P3C06	P3	C06	-0.117906	-0.253932	-0.185919	-0.166224	-0.0876043	-0.0690711	-0.0783377	-0.0342704	-0.0655174	-0.0524456	-0.0589815	-0.0149142	-0.0190931	-0.0185964	-0.0188448	0.000850327	0.0477416	0.0125612	0.0301514	0.0498465	-0.00757947	-0.00650752	-0.00704349	0.0370238	0.0762851	0.0551626	0.0657239	0.085419	0.0644933	0.0678827	0.066188	0.110255
P3C07	P3	C07	-0.0417743	-0.0564434	-0.0491088	-0.0294137	-0.0877941	-0.046376	-0.067085	-0.0230178	-0.0540527	-0.0169444	-0.0354986	0.00856869	-0.00674019	-0.00274613	-0.00474316	0.0149519	0.102085	0.0636095	0.0828473	0.102542	0.066155	0.0632911	0.064723	0.10879	0.120761	0.108475	0.114618	0.134313	0.118828	0.11909	0.118959	0.163026
P3C08	P3	C08	-0.041592	-0.0687998	-0.0551959	-0.0355008	-0.0521329	-0.053347	-0.05274	-0.00867273	-0.0729306	-0.0221621	-0.0475464	-0.0034791	0.0200633	0.0274914	0.0237773	0.0434724
P3C09	P3	C09	-0.0474184	-0.0584123	-0.0529154	-0.0332202	-0.0334243	-0.0200948	-0.0267596	0.0173077	-0.017674	0.0176747	3.80764e-07	0.0440676	0.0437168	0.0448104	0.0442636	0.0639587	0.101218	0.0721147	0.0866662	0.106361	0.0803289	0.0811389	0.0807339	0.124801	0.146688	0.112106	0.129397	0.149092	0.140777	0.127891	0.134334	0.178401
P3C10	P3	C10	-0.0599444	-0.0927999	-0.0763722	-0.0566771	-0.0549654	-0.0587915	-0.0568784	-0.0128112	-0.0175036	0.0103998	-0.0035519	0.0405154	0.0381631	0.0412171	0.0396901	0.0593852	0.102617	0.0714669	0.0870422	0.106737	0.0855184	0.0742841	0.0799013	0.123969	0.130818	0.10548	0.118149	0.137844	0.100249	0.117939	0.109094	0.153161
P3C11	P3	C11	-0.150458	-0.201042	-0.17575	-0.156055	-0.110034	-0.113542	-0.111788	-0.0677206	-0.0468592	-0.0359143	-0.0413868	0.00268049	0.00465954	0.017466	0.0110628	0.0307579	0.0450448	0.033188	0.0391164	0.0588115	0.0274145	0.031177	0.0292957	0.073363	0.0843393	0.0617948	0.0730671	0.0927622	0.0765565	0.0812518	0.0789041	0.122971
P3C12	P3	C12	-0.0907766	-0.0877933	-0.0892849	-0.0695898	-0.0638753	-0.0576772	-0.0607762	-0.016709	-0.0453678	-0.00611429	-0.025741	0.0183262	0.00510183	0.036051	0.0205764	0.0402715	0.0713397	0.0587401	0.0650399	0.084735	0.0801101	0.0692232	0.0746666	0.118734	0.124778	0.108674	0.116726	0.136421		-0.0261855	-0.0261855	0.0178818
P3D01	P3	D01	-0.162636	-0.263615	-0.213125	-0.19343	-0.111923	-0.0967044	-0.104314	-0.0602466	-0.0471474	-0.0307856	-0.0389665	0.00510078	0.0160957	-0.029367	-0.00663561	0.0130595	0.0419307	0.0188784	0.0304045	0.0500996	0.0283141	-0.01116	0.00857707	0.0526443	0.0995013	0.068668	0.0840846	0.10378		0	0	0.0440673
P3D02	P3	D02	-0.207533	-0.269248	-0.238391	-0.218695	-0.125311	-0.0834382	-0.104374	-0.0603072	-0.0736448	-0.0159109	-0.0447779	-0.000710606	0.0117157	-0.0130023	-0.000643274	0.0190518	0.0425905	-0.00590903	0.0183408	0.0380359	-0.0100822	-0.00744471	-0.00876343	0.0353038	0.0763463	0.0604718	0.0684091	0.0881042	0.0759725	0.0769631	0.0764678	0.120535
P3D03	P3	D03	-0.118286	-0.283811	-0.201049	-0.181354	-0.108547	-0.11342	-0.110984	-0.0669163	-0.0355168	0.027987	-0.0037649	0.0403024	0.024514	0.00502366	0.0147688	0.034464	0.0888194	0.0364774	0.0626484	0.0823435	0.0480985	0.0499684	0.0490334	0.0931007	0.0874018	0.0986023	0.093002	0.112697	0.108416	0.0895186	0.0989671	0.143034
P3D04	P3	D04	0.0252762	-0.0275887	-0.00115625	0.0185389	-0.0490192	-0.0397401	-0.0443797	-0.000312411	-0.0572024	-0.00450218	-0.0308523	0.013215	-0.0222927	-0.0592628	-0.0407778	-0.0210827	0.0157869	-0.0401839	-0.0121985	0.00749657	-0.0461272	-0.0545482	-0.0503377	-0.00627047	-0.0117538	-0.0375419	-0.0246479	-0.00495276	-0.0599724	-0.0414263	-0.0506993	-0.00663209
P3D05	P3	D05	-0.117591	-0.266043	-0.191817	-0.172122	-0.0896345	-0.0733161	-0.0814753	-0.0374081		-0.0357096	-0.0357096	0.00835767	0.035731	0.0125882	0.0241596	0.0438547	0.0944108	0.063558	0.0789844	0.0986795	0.0577853	0.0721347	0.06496	0.109027	0.105407	0.107225	0.106316	0.126011	0.127024	0.0962763	0.11165	0.155717
P3D06	P3	D06	-0.197687	-0.325389	-0.261538	-0.241843	-0.185948	-0.161557	-0.173753	-0.129685	-0.126109	-0.094818	-0.110464	-0.0663964	-0.0581568	-0.0718079	-0.0649824	-0.0452873	0.0132357	-0.0349761	-0.0108702	0.00882489	-0.0290673	-0.0132203	-0.0211438	0.0229235	0.0440306	0.0357168	0.0398737	0.0595688	0.0290607	0.0432427	0.0361517	0.0802189
P3D07	P3	D07	-0.0308015	-0.0664926	-0.0486471	-0.028952	-0.0829709	-0.0600781	-0.0715245	-0.0274573	-0.0576499	-0.0159754	-0.0368127	0.0072546	0.0518244	0.04582	0.0488222	0.0685173	0.120046	0.0768856	0.0984659	0.118161						-0.237392	-0.237392	-0.217697
P3D08	P3	D08	-0.0149911	-0.0721822	-0.0435866	-0.0238915	-0.0834801	-0.0695469	-0.0765135	-0.0324462	-0.083824	-0.0281309	-0.0559774	-0.0119102	-0.0262247	-0.0369114	-0.031568	-0.0118729	0.0555683	-0.0199409	0.0178137	0.0375088
P3D09	P3	D09	-0.0237691	-0.0695323	-0.0466507	-0.0269556	-0.0734198	-0.0629994	-0.0682096	-0.0241423	-0.0658507	-0.0227619	-0.0443063	-0.00023905	0.0541316	0.0443817	0.0492566	0.0689517	0.120474	0.0725698	0.0965221	0.116217	0.0866096	0.0621461	0.0743778	0.118445	0.159472	0.137151	0.148312	0.168007	0.149567	0.139669	0.144618	0.188685
P3D10	P3	D10	-0.0489064	-0.0795843	-0.0642454	-0.0445503	-0.0833308	-0.082542	-0.0829364	-0.0388691	-0.0841769	-0.0773521	-0.0807645	-0.0366973	-0.00660802	-0.00668774	-0.00664788	0.0130472	0.0937214	0.0472685	0.0704949	0.09019	0.066404	0.0737456	0.0700748	0.114142	0.122732	0.119265	0.120998	0.140693	0.104458	0.112212	0.108335	0.152402
P3D11	P3	D11	-0.141754	-0.287715	-0.214734	-0.195039	-0.154992	-0.123189	-0.13909	-0.0950231	-0.034853	-0.0351006	-0.0349768	0.00909046	0.0260057	0.0121076	0.0190567	0.0387518	0.0524361	0.0349683	0.0437022	0.0633973	0.0328332	0.0452368	0.039035	0.0831022	0.0778314	0.0618836	0.0698575	0.0895526	0.086066	0.0765259	0.081296	0.125363
P3D12	P3	D12	-0.0677084	-0.0897202	-0.0787143	-0.0590192	-0.0838848	-0.0914559	-0.0876703	-0.0436031	-0.0665696	-0.0510875	-0.0588286	-0.0147613	0.00300704	0.0141693	0.00858815	0.0282833	0.0399196	0.0297227	0.0348211	0.0545162	0.0417485	0.000186803	0.0209677	0.0650349
P3E01	P3	E01	-0.126088	-0.277846	-0.201967	-0.182272	-0.0761579	-0.086181	-0.0811695	-0.0371022	-0.0410346	-0.0140377	-0.0275362	0.0165311	0.00826002	-0.0113925	-0.00156625	0.0181289	0.0380692	0.00372913	0.0208992	0.0405943	0.0156785	0.0191513	0.0174149	0.0614822	0.0652741	0.0547087	0.0599914	0.0796865
P3E02	P3	E02	-0.131241	-0.264027	-0.197634	-0.177939	-0.11932	-0.101781	-0.11055	-0.0664831	-0.0258045	0.00934655	-0.00822896	0.0358383	0.0457377	0.0213513	0.0335445	0.0532396	0.0694084	0.0325719	0.0509902	0.0706853	0.0325087	0.0529313	0.04272	0.0867873	0.090787	0.0832225	0.0870048	0.1067	0.0840131	0.0957983	0.0899057	0.133973
P3E03	P3	E03	-0.0878756	-0.271377	-0.179627	-0.159931	-0.0762107	-0.0510111	-0.0636109	-0.0195437	-0.046461	-0.023537	-0.034999	0.00906825	0.0265036	-0.00196494	0.0122693	0.0319645	0.0965194	0.0350667	0.065793	0.0854881	0.0110862	0.0203313	0.0157088	0.059776	0.0910444	0.0868031	0.0889237	0.108619	0.0755018	0.067933	0.0717174	0.115785
P3E04	P3	E04	-0.20174	-0.261853	-0.231796	-0.212101	-0.0837635	-0.0663331	-0.0750483	-0.030981	-0.0810383	-0.0508091	-0.0659237	-0.0218565	-0.00317498	-0.0317744	-0.0174747	0.00222042	0.0635244	0.0168703	0.0401973	0.0598924	0.00405803	0.0236167	0.0138374	0.0579046	0.0696469	0.0677871	0.068717	0.0884121	0.0542062	0.0705622	0.0623842	0.106451
P3E05	P3	E05	-0.0904954	-0.11819	-0.104343	-0.0846475	-0.148018	-0.112891	-0.130455	-0.0863873	-0.0651634	-0.0433932	-0.0542783	-0.010211	0.00447574	-0.010621	-0.00307264	0.0166225	0.0675425	0.0234313	0.0454869	0.065182	0.0110144	0.0250076	0.018011	0.0620783
P3E06	P3	E06	-0.203655	-0.258853	-0.231254	-0.211559	-0.119946	-0.11188	-0.115913	-0.0718455	-0.0252004	-0.00862749	-0.016914	0.0271533	0.0355372	0.0165938	0.0260655	0.0457606	0.0874277	0.025929	0.0566783	0.0763735	0.0189967	0.0229249	0.0209608	0.0650281	0.0804116	0.0764767	0.0784441	0.0981392
P3E07	P3	E07	-0.0126055	-0.0535025	-0.033054	-0.0133589	-0.0962945	-0.0780718	-0.0871832	-0.0431159	-0.112408	-0.20976	-0.161084	-0.117017	-0.0163474	-0.0269237	-0.0216356	-0.00194048	0.0622362	-0.0118629	0.0251866	0.0448817	0.11794	0.116941	0.11744	0.161508
P3E08	P3	E08	-0.0137664	-0.0582066	-0.0359865	-0.0162914	-0.0734523	-0.0764703	-0.0749613	-0.030894	-0.0459211	0.00421196	-0.0208546	0.0232127	0.00579461	-0.0144435	-0.00432445	0.0153707	0.0786313	-0.00029492	0.0391682	0.0588633	0.0534322	0.0546931	0.0540626	0.0981299	0.116639	0.109872	0.113255	0.13295	0.100638	0.103286	0.101962	0.146029
P3E09	P3	E09	-0.0127475	-0.045606	-0.0291767	-0.00948164	-0.0863423	-0.0864679	-0.0864051	-0.0423378	-0.0230002	0.021722	-0.000639131	0.0434281	0.0508073	0.0169382	0.0338727	0.0535678	0.103718	0.0564473	0.0800828	0.0997779	0.0826614	0.0687329	0.0756972	0.119764
P3E10	P3	E10	-0.0219892	-0.0733475	-0.0476684	-0.0279732	-0.030853	-0.0421319	-0.0364925	0.00757478	-0.0304984	-0.00234225	-0.0164203	0.027647	0.0588556	0.0386367	0.0487462	0.0684413	0.109093	0.0669443	0.0880186	0.107714	0.0807284	0.0821063	0.0814174	0.125485	0.141125	0.117702	0.129414	0.149109	0.0973934	0.092791	0.0950922	0.139159
P3E11	P3	E11	-0.122407	-0.191158	-0.156782	-0.137087	-0.0952957	-0.0886953	-0.0919955	-0.0479282	-0.0598723	-0.088793	-0.0743326	-0.0302654	-0.0115564	-0.0103509	-0.0109536	0.00874147	0.0311482	0.0193266	0.0252374	0.0449325	0.0166934	0.0162265	0.01646	0.0605272	0.0906851	0.0702241	0.0804546	0.10015	0.0962565	0.0933552	0.0948058	0.138873
P3E12	P3	E12	-0.0433046	-0.079686	-0.0614953	-0.0418002	-0.076509	-0.0660001	-0.0712546	-0.0271873	-0.0130213	-0.00120131	-0.00711129	0.036956	0.00807775	0.0148327	0.0114552	0.0311503	0.0576345	0.0475951	0.0526148	0.0723099	0.0629099	0.0721376	0.0675238	0.111591	0.0920778	0.0925853	0.0923315	0.112027	0.110972	0.10612	0.108546	0.152614
P3F01	P3	F01	-0.198435	-0.267996	-0.233216	-0.213521	-0.0991723	-0.0893284	-0.0942503	-0.0501831	-0.0708966	-0.0413089	-0.0561028	-0.0120355	-0.00848086	-0.0414835	-0.0249822	-0.00528708	0.0446496	-0.00368357	0.020483	0.0401781	0.00329966	0.00614279	0.00472123	0.0487885	0.0749791	0.0439747	0.0594769	0.079172
P3F02	P3	F02	-0.234824	-0.262688	-0.248756	-0.229061	-0.0558115	-0.0416045	-0.048708	-0.00464074	-0.0500832	-0.00304271	-0.0265629	0.0175043	0.0202522	0.00817652	0.0142144	0.0339095	0.0725071	0.0341926	0.0533499	0.073045	0.019907	0.0237039	0.0218055	0.0658727	0.0869276	0.0918562	0.0893919	0.109087	0.0977466	0.084811	0.0912788	0.135346
P3F03	P3	F03	-0.0607302	-0.123181	-0.0919555	-0.0722604	-0.132337	-0.109164	-0.12075	-0.0766831	-0.0897828	-0.0613714	-0.0755771	-0.0315099	0.00499272	-0.00741169	-0.00120948	0.0184856	0.0667348	0.00932194	0.0380283	0.0577235	0.00570123	0.0187305	0.0122159	0.0562831	0.0727495	0.0685081	0.0706288	0.0903239	0.0784392	0.0802633	0.0793512	0.123418
P3F04	P3	F04	-0.21374	-0.266309	-0.240025	-0.22033	-0.116816	-0.0756659	-0.0962408	-0.0521735	-0.0721704	-0.000622244	-0.0363963	0.00767095	0.0141254	-0.0139056	0.000109935	0.019805	0.0796099	0.0152664	0.0474382	0.0671333	0.0232471	0.0294318	0.0263394	0.0704067	0.0795367	0.0844368	0.0819867	0.101682	0.0598058	0.0729874	0.0663966	0.110464
P3F05	P3	F05	-0.0336013	-0.20289	-0.118246	-0.0985505	-0.0839823	-0.0683277	-0.076155	-0.0320877	-0.0160005	0.0128906	-0.00155496	0.0425123	0.050815	0.0351607	0.0429878	0.0626829	0.118738	0.0695265	0.0941321	0.113827	0.0646583	0.0765742	0.0706163	0.114684	0.116192	0.0951091	0.105651	0.125346	0.103826	0.0971104	0.100468	0.144535
P3F06	P3	F06	-6.36756e-05	-0.0688151	-0.0344394	-0.0147443	-0.116561	-0.0741181	-0.0953393	-0.051272	-0.186528	-0.0831899	-0.134859	-0.0907917	-0.0674069	-0.223442	-0.145424	-0.125729	-0.0420543	-0.221923	-0.131989	-0.112294	-0.162601	-0.137435	-0.150018	-0.105951	-0.126449	-0.15959	-0.143019	-0.123324	-0.14216	-0.171416	-0.156788	-0.112721
P3F07	P3	F07	0.00566709	-0.0411106	-0.0177218	0.00197332	-0.0598928	-0.0258832	-0.042888	0.00117925	-0.0496944	-0.00377369	-0.0267341	0.0173332	0.0176406	-0.00693437	0.0053531	0.0250482	0.0710901	0.0161444	0.0436172	0.0633123	0.0634816	0.0612351	0.0623584	0.106426	0.113849	0.12348	0.118665	0.13836	0.0928673	0.0992619	0.0960646	0.140132
P3F08	P3	F08	0.0117728	-0.0606923	-0.0244598	-0.00476465	-0.0150371	-0.00257339	-0.00880524	0.035262	0.00293359	0.0275377	0.0152357	0.0593029	0.0636813	0.0508208	0.0572511	0.0769462	0.0960045	0.0540028	0.0750036	0.0946987	0.0490892	0.0511277	0.0501084	0.0941757	0.0627625	0.0652775	0.06402	0.0837151	0.078047	0.0826709	0.080359	0.124426
P3F09	P3	F09	-0.00860777	-0.05498	-0.0317939	-0.0120988	-0.055433	-0.0289862	-0.0422096	0.00185765	-0.0650752	-0.0365528	-0.050814	-0.00674671	0.0227219	-0.00291409	0.0099039	0.029599	0.101701	0.0399403	0.0708205	0.0905156	0.0745084	0.0927878	0.0836481	0.127715	0.12334	0.108196	0.115768	0.135463	0.0980195	0.115951	0.106985	0.151053
P3F10	P3	F10	-0.0174684	-0.0626314	-0.0400499	-0.0203548	-0.0838626	-0.072093	-0.0779778	-0.0339105	-0.069496	-0.0279183	-0.0487071	-0.0046399	0.0427969	0.0212746	0.0320357	0.0517308	0.109882	0.053072	0.081477	0.101172	0.083289	0.0774506	0.0803698	0.124437	0.110685	0.10664	0.108662	0.128358	0.101534	0.123579	0.112556	0.156624
P3F11	P3	F11	-0.129859	-0.259971	-0.194915	-0.17522	-0.142298	-0.108379	-0.125338	-0.081271	-0.071398	-0.0671166	-0.0692573	-0.02519	0.00504971	-0.00364572	0.000701996	0.0203971	0.0260606	0.00459475	0.0153277	0.0350228	0.0195201	0.0160292	0.0177747	0.0618419	0.0705861	0.0650337	0.0678099	0.087505	0.0748247	0.0632745	0.0690496	0.113117
P3F12	P3	F12	-0.0479157	-0.0893833	-0.0686495	-0.0489544	-0.0817366	-0.0957386	-0.0887376	-0.0446704	-0.066553	-0.0618283	-0.0641907	-0.0201234	0.0200183	0.0335004	0.0267593	0.0464544	0.0394862	0.0393551	0.0394206	0.0591157	0.0526266	0.0505161	0.0515713	0.0956386	0.0707266	0.0838594	0.077293	0.0969881	0.103989	0.104056	0.104022	0.14809
P3G01	P3	G01	-0.219043	-0.263437	-0.24124	-0.221545	-0.0505203	-0.0284157	-0.039468	0.00459925	-0.0259396	-0.0119619	-0.0189508	0.0251165	0.0158236	-0.0198061	-0.00199124	0.0177039	0.0408055	0.01856	0.0296827	0.0493778	0.0325839	0.0486843	0.0406341	0.0847014	0.0709849	0.0846066	0.0777957	0.0974908
P3G02	P3	G02	-0.135096	-0.26515	-0.200123	-0.180428	-0.12131	-0.0794196	-0.100365	-0.0562975	-0.0636312	-0.0391711	-0.0514012	-0.00733393	0.0148824	-0.0249057	-0.00501167	0.0146834	0.0481542	0.00108315	0.0246187	0.0443138	0.0245952	0.0171103	0.0208528	0.06492	0.0760039	0.0893001	0.082652	0.102347	0.0901487	0.0789741	0.0845614	0.128629
P3G03	P3	G03	-0.17269	-0.257531	-0.21511	-0.195415	-0.0199366	-0.026196	-0.0230663	0.021001	-0.0165108	4.63434e-05	-0.00823224	0.035835	0.0395085	0.0159736	0.0277411	0.0474362	0.0807317	0.037428	0.0590798	0.0787749	0.0306525	0.0326146	0.0316335	0.0757008	0.0874171	0.0832058	0.0853115	0.105007	0.107456	0.0804607	0.0939582	0.138025
P3G04	P3	G04	-0.181147	-0.256998	-0.219073	-0.199378	-0.0826112	-0.035907	-0.0592591	-0.0151919	-0.0526654	-0.0137698	-0.0332176	0.0108497	0.0267414	-0.0161538	0.00529381	0.0249889	0.0692787	0.00809027	0.0386845	0.0583796	0.000253521	0.0091182	0.00468586	0.0487531	0.0515547	0.0563658	0.0539603	0.0736554	0.0584135	0.0609127	0.0596631	0.10373
P3G05	P3	G05	-0.115385	-0.253834	-0.18461	-0.164914	-0.157488	-0.0967241	-0.127106	-0.0830387	-0.0594731	-0.0260746	-0.0427739	0.00129338	0.018675	-0.0136723	0.00250134	0.0221964	0.0623828	0.00358597	0.0329844	0.0526795	-0.0160893	-0.0230106	-0.0195499	0.0245173	0.0646043	0.04353	0.0540671	0.0737622	0.0565184	0.0595946	0.0580565	0.102124
P3G06	P3	G06	-0.0819908	-0.276028	-0.179009	-0.159314	-0.0921291	-0.0685578	-0.0803435	-0.0362762	-0.0445609	-0.0269154	-0.0357382	0.0083291	0.0538753	0.028999	0.0414372	0.0611323	0.09916	0.0496577	0.0744088	0.0941039	0.0387809	0.0519122	0.0453465	0.0894138	0.0992577	0.101634	0.100446	0.120141	0.111351	0.0906534	0.101002	0.145069
P3G07	P3	G07	0.0112007	-0.0484314	-0.0186153	0.00107977	-0.0752968	-0.0653095	-0.0703031	-0.0262359	-0.0424856	-0.00561031	-0.024048	0.0200193	0.0229962	-0.0258702	-0.00143701	0.0182581	0.0626427	-0.000920047	0.0308613	0.0505565	0.00359917	-0.00435917	-0.00038	0.0436873	0.0764685	0.0573488	0.0669086	0.0866037	0.0982182	0.0831603	0.0906893	0.134757
P3G08	P3	G08	-0.0107063	-0.0632064	-0.0369563	-0.0172612	-0.0466626	-0.0437106	-0.0451866	-0.00111939	-0.0144725	0.00678495	-0.00384379	0.0402235	0.0381866	0.00671994	0.0224533	0.0421484	0.0810351	0.0369838	0.0590094	0.0787045	0.0724234	0.0672677	0.0698455	0.113913	0.115533	0.123743	0.119638	0.139333	0.144981	0.124986	0.134983	0.179051
P3G09	P3	G09	-0.0107412	-0.0734318	-0.0420865	-0.0223914	-0.065941	-0.0505323	-0.0582366	-0.0141694	-0.0326474	-0.0230723	-0.0278599	0.0162074	0.0249622	0.00751608	0.0162391	0.0359342	0.0660165	0.00258264	0.0342996	0.0539947	0.065806	0.0599988	0.0629024	0.10697	0.10631	0.127856	0.117083	0.136778	0.131497	0.116415	0.123956	0.168023
P3G10	P3	G10	-0.0109527	-0.0731451	-0.0420489	-0.0223538	-0.0775662	-0.0661267	-0.0718464	-0.0277792	-0.0412306	-0.0208651	-0.0310478	0.0130194	0.033676	0.00493908	0.0193075	0.0390027	0.093163	0.0450056	0.0690843	0.0887794	0.0700979	0.0486405	0.0593692	0.103436	0.108584	0.103108	0.105846	0.125541	0.0938532	0.0972704	0.0955618	0.139629
P3G11	P3	G11	-0.124405	-0.228535	-0.17647	-0.156775	-0.11174	-0.092584	-0.102162	-0.0580945	-0.0476902	-0.032769	-0.0402296	0.00383767	0.01007	-0.00340824	0.00333086	0.023026	0.0357887	0.00495794	0.0203733	0.0400684	0.0265098	0.00278854	0.0146492	0.0587164	0.0486812	0.0458411	0.0472611	0.0669562	0.0637623	0.0478687	0.0558155	0.0998828
P3G12	P3	G12	-0.113408	-0.205561	-0.159484	-0.139789	-0.1285	-0.119107	-0.123804	-0.0797364	-0.105468	-0.111088	-0.108278	-0.0642106	-0.21967	-0.243925	-0.231798	-0.212103	-0.249375	-0.233962	-0.241668	-0.221973	-0.169783	-0.1529	-0.161341	-0.117274	-0.17432	-0.250153	-0.212237	-0.192542	-0.14572	-0.123297	-0.134509	-0.0904413
P3H01	P3	H01	-0.0806036	-0.105865	-0.0932343	-0.0735392	-0.0825137	-0.0538983	-0.068206	-0.0241387	-0.0307749	-0.0316183	-0.0311966	0.0128707																		0	0	0.0440673
P3H02	P3	H02	-0.12045	-0.267092	-0.193771	-0.174076	-0.0763585	-0.0728682	-0.0746134	-0.0305461	-0.034996	-0.0251851	-0.0300906	0.0139767	0.0339748	-0.0126467	0.010664	0.0303591	0.0719242	0.0127606	0.0423424	0.0620375	0.0240101	-0.00197299	0.0110185	0.0550858	0.0896084	0.0901785	0.0898934	0.109589	0.119963	0.0920034	0.105983	0.150051
P3H03	P3	H03	-0.120196	-0.259857	-0.190026	-0.170331	-0.0767691	-0.0566275	-0.0666983	-0.0226311	-0.0560205	-0.0430465	-0.0495335	-0.00546624	0.0392545	-0.0162109	0.0115218	0.0312169	0.0827449	0.0166814	0.0497132	0.0694083	0.0174372	0.0225956	0.0200164	0.0640837	0.0775111	0.0726457	0.0750784	0.0947735	0.0975259	0.0791035	0.0883147	0.132382
P3H04	P3	H04	-0.0903325	-0.26888	-0.179606	-0.159911	-0.0884686	-0.0664072	-0.0774379	-0.0333706	-0.030621	-0.0158876	-0.0232543	0.0208129	0.0551927	0.0110951	0.0331439	0.052839	0.093117	0.0429453	0.0680311	0.0877263	0.0238317	0.0194921	0.0216619	0.0657291	0.0926816	0.089495	0.0910883	0.110783	0.102747	0.100318	0.101532	0.145599
P3H05	P3	H05	-0.0965949	-0.270409	-0.183502	-0.163807	-0.11535	-0.099064	-0.107207	-0.0631396	-0.0466063	-0.0420971	-0.0443517	-0.000284436	0.0366001	-0.00521947	0.0156903	0.0353854	0.0840741	0.0295738	0.056824	0.0765191	0.0094327	0.00537892	0.00740581	0.0514731	0.071192	0.0710697	0.0711309	0.090826	0.100392	0.0858867	0.0931393	0.137207
P3H06	P3	H06	-0.104273	-0.26646	-0.185367	-0.165671	-0.0983762	-0.0729206	-0.0856484	-0.0415812	-0.0251681	-0.0199699	-0.022569	0.0214983	0.0260597	0.0062822	0.016171	0.0358661	0.0904751	0.0360611	0.0632681	0.0829632	0.0488588	0.0344437	0.0416512	0.0857185	0.10154	0.0912576	0.096399	0.116094
P3H07	P3	H07	0.0132352	-0.0663512	-0.026558	-0.00686288	-0.0665368	-0.0598442	-0.0631905	-0.0191233	-0.0333156	-0.0207317	-0.0270236	0.0170436	0.0743288	0.0228073	0.0485681	0.0682632	0.10984	0.067374	0.0886069	0.108302						-0.238313	-0.238313	-0.218618
P3H08	P3	H08	0.0128843	-0.0631608	-0.0251383	-0.00544318	-0.0296715	-0.00980335	-0.0197374	0.0243298	-0.0208545	0.0158027	-0.0025259	0.0415414	0.0621617	0.00270902	0.0324353	0.0521304	0.0971735	0.0525871	0.0748803	0.0945754
P3H09	P3	H09	0.000215192	-0.06114	-0.0304624	-0.0107673	-0.0529826	-0.0309762	-0.0419794	0.00208784	0.00405793	0.0324943	0.0182761	0.0623434	0.0579291	0.0219066	0.0399179	0.059613	0.088154	0.0475749	0.0678645	0.0875596	0.0635918	0.0776773	0.0706346	0.114702
P3H10	P3	H10	-0.0276287	-0.0968063	-0.0622175	-0.0425224	-0.0667322	-0.0371094	-0.0519208	-0.00785353	-0.0397811	-0.00977088	-0.024776	0.0192913	0.0383457	0.0139484	0.0261471	0.0458422	0.0936351	0.0461047	0.0698699	0.089565	0.0578209	0.0388	0.0483104	0.0923777
P3H11	P3	H11	-0.0824791	-0.179554	-0.131016	-0.111321	-0.0685554	-0.0726459	-0.0706006	-0.0265334	-0.0280203	-0.017838	-0.0229291	0.0211381	0.00562034	0.00939032	0.00750533	0.0272004	0.044504	0.0267481	0.035626	0.0553211	0.0314516	0.0382963	0.0348739	0.0789412		-0.359102	-0.359102	-0.339407
P3H12	P3	H12	-0.0255769	-0.0762953	-0.0509361	-0.031241	-0.0943651	-0.0629301	-0.0786476	-0.0345803	-0.0449485	-0.035241	-0.0400947	0.00397251	-0.374665		-0.374665	-0.35497	-0.0133975		-0.0133975	0.00629757										-0.00396296	-0.00396296	0.0401043

## Sheet: Fitness_Assay_Counts
platewell	Plate	Well	Gen70_Ref_Counts_T0_R1	Gen70_Ref_Counts_T0_R2	Gen70_Ref_Counts_T1_R1	Gen70_Ref_Counts_T1_R2	Gen70_Ref_Counts_T2_R1	Gen70_Ref_Counts_T2_R2	Gen70_Ref_Counts_T3_R1	Gen70_Ref_Counts_T3_R2	Gen70_NonRef_Counts_T0_R1	Gen70_NonRef_Counts_T0_R2	Gen70_NonRef_Counts_T1_R1	Gen70_NonRef_Counts_T1_R2	Gen70_NonRef_Counts_T2_R1	Gen70_NonRef_Counts_T2_R2	Gen70_NonRef_Counts_T3_R1	Gen70_NonRef_Counts_T3_R2	Gen70_Uncorrected_Ref_Freq_T0_R1	Gen70_Uncorrected_Ref_Freq_T0_R2	Gen70_Uncorrected_Ref_Freq_T1_R1	Gen70_Uncorrected_Ref_Freq_T1_R2	Gen70_Uncorrected_Ref_Freq_T2_R1	Gen70_Uncorrected_Ref_Freq_T2_R2	Gen70_Uncorrected_Ref_Freq_T3_R1	Gen70_Uncorrected_Ref_Freq_T3_R2	Gen70_Ref_Freq_T0_R1	Gen70_Ref_Freq_T0_R2	Gen70_Ref_Freq_T1_R1	Gen70_Ref_Freq_T1_R2	Gen70_Ref_Freq_T2_R1	Gen70_Ref_Freq_T2_R2	Gen70_Ref_Freq_T3_R1	Gen70_Ref_Freq_T3_R2	Gen550_Ref_Counts_T0_R1	Gen550_Ref_Counts_T0_R2	Gen550_Ref_Counts_T1_R1	Gen550_Ref_Counts_T1_R2	Gen550_Ref_Counts_T2_R1	Gen550_Ref_Counts_T2_R2	Gen550_Ref_Counts_T3_R1	Gen550_Ref_Counts_T3_R2	Gen550_NonRef_Counts_T0_R1	Gen550_NonRef_Counts_T0_R2	Gen550_NonRef_Counts_T1_R1	Gen550_NonRef_Counts_T1_R2	Gen550_NonRef_Counts_T2_R1	Gen550_NonRef_Counts_T2_R2	Gen550_NonRef_Counts_T3_R1
P1A01	P1	A01	0	0	1	1	5	1	4	0	1	0	1	1	16	1	2	1																	0	0	0	2	0	1	0	0	0	0	0	1	0	3	1
P1A02	P1	A02	4139	17454	26610	23006	29592	29121	34110	31913	5880	20328	12316	14869	8499	9212	5091	6603	0.413115	0.461966	0.683605	0.607419	0.776876	0.759685	0.870131	0.828565	0.418682	0.467246	0.68806	0.61365	0.795199	0.773157	0.880115	0.843344	7897	16974	22056	20032	19228	26739	18984	30738	9797	20176	11492	12582	6196	10597	3760
P1A03	P1	A03	5082	18258	27323	27409	32623	32077	34851	34309	6070	19888	11779	10994	6818	6275	4577	4404	0.455703	0.478635	0.698762	0.71372	0.827134	0.836384	0.883915	0.88624	0.461844	0.484105	0.703317	0.721042	0.846643	0.851216	0.894057	0.902048	7853	19800	19098	20594	17574	26985	18462	29962	6760	18443	8595	11226	5528	11102	4245
P1A04	P1	A04	4467	16761	25059	27169	31020	32180	33646	32048	5924	20137	13963	11126	8377	6441	5717	3934	0.429891	0.454252	0.642176	0.709466	0.78737	0.833225	0.854762	0.890668	0.435684	0.459444	0.646362	0.716744	0.80594	0.848002	0.86457	0.906555	7631	17341	18341	15311	18683	27062	17066	30884	9389	20141	10727	10133	7169	10607	4626
P1A05	P1	A05	4495	16899	27185	25911	32579	31015	35210	32191	5770	19836	11546	11639	6726	7248	4058	4461	0.437896	0.460024	0.701893	0.69004	0.828877	0.810574	0.896659	0.878288	0.443797	0.465282	0.706467	0.697118	0.848426	0.824949	0.906947	0.893954	7171	16654	19146	20036	15920	22621	17127	26913	8990	19706	12588	15378	7910	13648	6152
P1A06	P1	A06	5066	16736	21902	18665	25284	20044	24623	21323	7018	19890	16294	17535	13225	16136	13455	14966	0.419232	0.456943	0.573411	0.515608	0.656574	0.554008	0.646646	0.587589	0.424881	0.462166	0.577148	0.520897	0.672059	0.563833	0.654066	0.59807	7155	14181	13548	13080	10126	12629	9960	11786	10948	20155	22959	19133	18921	20455	18531
P1A07	P1	A07	4884	18573	35446	31444	38160	37309	38659	36888	2888	9885	4007	4488	1441	1737	853	875	0.62841	0.652646	0.898436	0.875097	0.963612	0.955514	0.978412	0.976829	0.636878	0.660105	0.904292	0.884074	0.986339	0.972459	0.989638	0.99	7396	20676	23604	34415	22346	36747	20645	37986	4077	11797	2744	4358	1423	2052	754
P1A08	P1	A08	5348	18292	35794	33705	38407	37793	38522	36607	2923	9975	3745	2997	1162	1256	954	583	0.646597	0.647115	0.905283	0.918342	0.970634	0.967835	0.975833	0.984324	0.65531	0.654511	0.911184	0.927763	0.99	0.984999	0.98703	0.99	7224	22582	24516	25816	20080	36811	21559	37842	3129	11471	2163	4244	937	2029	477
P1A09	P1	A09	4881	18148	33821	30790	37847	36278	38139	36056	3055	10124	5695	5092	1772	2718	1366	1372	0.615045	0.641907	0.855881	0.85809	0.955274	0.930301	0.965422	0.963343	0.623333	0.649244	0.86146	0.866893	0.977805	0.946798	0.9765	0.980527	7437	21779	15694	20911	12658	21481	10752	21529	4939	17410	9240	17575	8381	17306	7085
P1A10	P1	A10	6005	20244	35625	35168	38601	37984	38955	38474	3149	10170	3892	2996	1004	1076	578	487	0.655997	0.665615	0.901511	0.921497	0.97465	0.972453	0.985379	0.9875	0.664837	0.673222	0.907387	0.930949	0.99	0.989698	0.99	0.99	6973	25289	20232	22681	10031	13285	4112	6392	3875	13832	12620	12296	20772	23931	23666
P1A11	P1	A11	5930	18523	25793	23948	28309	25760	28329	27133	5988	16703	12553	13164	10483	11371	10313	10350	0.497567	0.525833	0.672639	0.64529	0.729764	0.69376	0.733114	0.723875	0.504272	0.531843	0.677023	0.651909	0.746976	0.706063	0.741526	0.736787	7994	23296	29576	32516	25525	37931	22607	38520	71	320	214	1448	304	835	314
P1A12	P1	A12	6905	19032	30625	25709	25473	19573	16459	12139	5354	18262	8095	11224	12404	14601	19515	19391	0.56326	0.510323	0.790935	0.696098	0.672519	0.572745	0.457525	0.384998	0.57085	0.516156	0.79609	0.703239	0.688381	0.582902	0.462775	0.391866	7711	19876	26837	28884	23923	32825	24845	36088	7157	17046	4745	9269	1944	5436	1021
P1B01	P1	B01	5605	18029	24508	26048	30633	30669	33338	33903	7680	20054	14452	12199	8657	7732	6039	4720	0.421904	0.473413	0.629055	0.681047	0.779664	0.798651	0.846636	0.877793	0.42759	0.478824	0.633156	0.688033	0.798053	0.812814	0.856351	0.893451	7091	16348	23388	21871	16700	28174	16417	31553	10000	19981	14247	11139	6610	8975	4349
P1B02	P1	B02	5390	16778	23206	23243	28784	28898	31414	29894	7556	19575	15510	14434	10378	9345	7835	5822	0.416345	0.46153	0.59939	0.616902	0.734998	0.755642	0.800377	0.836992	0.421955	0.466805	0.603297	0.62323	0.752334	0.769042	0.809561	0.851922	6428	18201	18519	24653	16179	31157	15290	33588	7455	19521	11373	8768	6567	6868	4307
P1B03	P1	B03	5125	16615	24742	24644	29764	29882	32423	31863	6738	18307	14207	13307	9518	8531	6889	5541	0.432016	0.475775	0.635241	0.649364	0.757701	0.777914	0.824761	0.851861	0.437837	0.481212	0.639381	0.656025	0.775571	0.791709	0.834224	0.867056	6666	17005	17237	22316	15232	28860	15835	31074	8298	20270	12622	11193	7338	9046	4665
P1B04	P1	B04	5211	17279	24672	25961	30096	30679	33294	31198	6892	19538	14227	11857	9245	7751	6086	4796	0.430554	0.469321	0.634258	0.686472	0.765003	0.798309	0.845455	0.866756	0.436356	0.474685	0.638392	0.693514	0.783046	0.812466	0.855156	0.882217	7107	17500	17563	19790	15925	30021	16059	32932	8049	19886	10946	9794	6020	7879	3692
P1B05	P1	B05	4838	16551	24549	26926	30581	31384	33715	32326	6487	19050	14315	11243	8725	7042	5631	3954	0.427196	0.464903	0.631664	0.705442	0.778024	0.816739	0.856885	0.891014	0.432953	0.470216	0.635781	0.712678	0.796374	0.831223	0.866717	0.906908	6823	16809	16850	17758	16318	27042	15946	31254	7931	19654	10745	10836	6299	10161	3976
P1B06	P1	B06	5065	16399	26894	27529	31840	32057	34313	32213	6660	19073	12097	10657	7540	6438	5015	3879	0.431983	0.462308	0.689749	0.720919	0.808532	0.832758	0.872483	0.892525	0.437804	0.467592	0.694245	0.728314	0.827602	0.847526	0.882494	0.908445	6862	16663	16572	17761	15345	23262	14150	27284	8607	20594	12453	16217	7838	14011	5147
P1B07	P1	B07	5392	17376	36024	31290	38223	37417	37633	34854	3291	9398	3484	3364	1319	1550	712	792	0.620984	0.648988	0.911815	0.902926	0.966643	0.960223	0.981432	0.977782	0.629352	0.656405	0.917758	0.912188	0.989442	0.977251	0.99	0.99	6779	20353	16201	26790	14613	28305	12057	28251	3577	11437	5301	11056	4646	10589	4242
P1B08	P1	B08	5201	16845	34855	27946	37857	37321	38453	35376	3276	9103	4616	3488	1661	1715	1012	687	0.613543	0.649183	0.883053	0.889037	0.957969	0.956066	0.974357	0.98095	0.62181	0.656603	0.888809	0.898157	0.980563	0.973021	0.985537	0.99	7128	20469	21179	33496	20164	37305	17905	38122	2811	9428	2317	2901	1052	1467	737
P1B09	P1	B09	5179	17212	34783	28988	38200	37021	38705	35307	3051	8769	4656	3504	1393	1912	776	753	0.629283	0.662484	0.881944	0.892158	0.964817	0.95089	0.980345	0.979118	0.637763	0.670056	0.887693	0.90131	0.987573	0.967753	0.99	0.99	6458	21008	23000	32432	17715	36680	16895	37752	2939	10067	2143	3821	811	2049	485
P1B10	P1	B10	5216	17862	35885	30449	38396	37558	38796	37244	3106	8458	3626	3066	1182	1413	666	596	0.626772	0.678647	0.908228	0.908519	0.970135	0.963742	0.983123	0.984249	0.635218	0.686404	0.914148	0.917838	0.99	0.980833	0.99	0.99	6802	20993	20662	28304	20098	36852	17648	37862	2558	9094	1700	3861	745	1861	484
P1B11	P1	B11	5549	17654	35338	33159	37967	37637	38365	37744	4581	9924	3832	3017	1558	1317	1048	972	0.547779	0.640148	0.90217	0.916602	0.960582	0.966191	0.97341	0.974894	0.55516	0.647465	0.90805	0.926005	0.983238	0.983325	0.984579	0.99	5928	17383	13758	17259	12930	21656	11685	23643	6644	19455	11850	12669	9967	14696	7942
P1B12	P1	B12	5774	17816	36055	31941	38415	37838	38720	38380	3086	9148	3437	3316	1185	1287	794	609	0.651693	0.660733	0.91297	0.905948	0.970076	0.967105	0.979906	0.98438	0.660475	0.668285	0.91892	0.915241	0.99	0.984256	0.99	0.99	7053	21206	23441	26291	20246	36532	20331	37744	3173	10171	2452	4681	1190	2271	655
P1C01	P1	C01	5236	17410	22641	25654	29489	30317	31906	33360	7374	20138	16333	12449	9797	8198	7450	5291	0.415226	0.463673	0.580926	0.67328	0.750624	0.787148	0.810702	0.863108	0.420821	0.468973	0.584712	0.680187	0.768327	0.801107	0.820005	0.878504	6710	17511	21659	25365	16999	29247	16975	32494	8004	19795	11369	11415	5933	8676	3792
P1C02	P1	C02	5029	16162	25875	24026	31886	29212	34619	32585	6878	19386	13097	13815	7480	9226	4759	5859	0.422357	0.454653	0.663938	0.63492	0.809988	0.759977	0.879146	0.847597	0.428048	0.459849	0.668266	0.641433	0.829092	0.773455	0.889233	0.862716	6585	16887	17165	23196	15691	27028	15154	29926	8242	19292	12413	12112	7014	10164	4843
P1C03	P1	C03	5231	15994	22524	21527	27778	26612	31063	29291	6599	18064	16037	15686	11241	11313	8063	7996	0.442181	0.469611	0.584113	0.578481	0.71191	0.701701	0.793922	0.785555	0.448139	0.474978	0.587921	0.584415	0.7287	0.714145	0.803032	0.799568	6734	17125	16106	17977	15094	24511	14493	27044	8102	18941	12602	12983	8216	12156	5782
P1C04	P1	C04	4850	16108	27021	26841	32625	31929	35482	31835	6288	18475	12087	11078	6795	6692	3924	3380	0.435446	0.465778	0.690933	0.707851	0.827626	0.826726	0.900421	0.904018	0.441314	0.471102	0.695436	0.715112	0.847146	0.841388	0.910753	0.920144	6604	17226	19508	22165	18212	31483	16146	34037	8609	19884	8629	9492	4668	6453	2555
P1C05	P1	C05	4902	15080	26504	27213	32370	32916	35003	33394	6870	17443	12748	10047	7153	5798	4332	3153	0.416412	0.463672	0.675227	0.730354	0.819017	0.850235	0.889869	0.913728	0.422023	0.468971	0.679628	0.737846	0.838334	0.865313	0.90008	0.930026	6583	16070	16162	18937	15423	27236	15955	31226	9238	20521	11593	11957	7360	10105	4826
P1C06	P1	C06	4747	15093	23077	27903	29053	32386	32371	33840	6913	17964	15749	10128	10167	6258	6900	3518	0.407118	0.456575	0.59437	0.733691	0.74077	0.83806	0.824298	0.90583	0.412604	0.461793	0.598244	0.741217	0.758241	0.852922	0.833756	0.921988	6554	16004	14420	21389	14387	25408	13417	27759	8311	20107	12010	12426	8611	11451	6601
P1C07	P1	C07	5133	16981	34884	27958	37908	36962	38521	33874	3213	9113	4633	4329	1662	1989	984	917	0.615025	0.650763	0.882759	0.865921	0.957998	0.948936	0.975092	0.973643	0.623313	0.658201	0.888513	0.874804	0.980593	0.965764	0.98628	0.99	6265	20334	14622	22233	12225	27816	11050	27513	3611	12998	6868	9492	5494	10801	5181
P1C08	P1	C08	4783	15462	34832	29015	38080	37110	38517	35541	2890	8094	4677	3785	1494	1910	956	976	0.623355	0.656393	0.881622	0.884604	0.962248	0.951051	0.975781	0.973273	0.631755	0.663896	0.887368	0.893678	0.984943	0.967917	0.986977	0.99	6539	21114	20099	32215	18939	37155	18281	37651	2110	8092	1794	2808	869	1433	664
P1C09	P1	C09	4924	16231	33524	28279	37793	36983	38248	34742	3010	8284	6015	4120	1786	1996	1248	1075	0.62062	0.662084	0.847872	0.872836	0.954875	0.948793	0.968402	0.969986	0.628983	0.669652	0.853398	0.881789	0.977396	0.965619	0.979514	0.987289	6128	17412	7066	7153	2984	3895	1207	1836	7037	21469	24163	26537	23134	33849	21407
P1C10	P1	C10	5178	17119	35088	28851	38295	37026	38786	35682	3310	8488	4433	3893	1263	1988	675	927	0.610038	0.668528	0.887832	0.881108	0.968072	0.949044	0.982895	0.974678	0.618258	0.676169	0.893619	0.890146	0.99	0.965874	0.99	0.99	5979	20721	18573	29999	19280	36658	16759	37297	3029	11258	2839	4529	1883	2164	1069
P1C11	P1	C11	5122	16564	19948	19902	22706	21263	22094	21816	7302	18719	17923	16749	15892	15494	16098	15074	0.412267	0.469461	0.526735	0.543014	0.588269	0.578475	0.578498	0.59138	0.417822	0.474827	0.530169	0.548584	0.602143	0.588734	0.585136	0.601929	6401	17858	13996	15767	11960	21063	12435	22833	7285	18950	12775	13415	9820	15235	9088
P1C12	P1	C12	5388	18081	35797	30756	38257	37415	38710	38138	3262	9016	3721	3722	1260	1642	846	914	0.62289	0.667269	0.90584	0.892047	0.968115	0.957959	0.978613	0.976595	0.631284	0.674896	0.911745	0.901198	0.99	0.974947	0.989841	0.99	7366	22570	21284	24170	19421	36599	18389	37828	3518	11559	2077	4477	1076	2347	578
P1D01	P1	D01	5718	16354	34451	33037	38479	37791	39033	38364	4987	10165	4845	4155	1112	1272	490	740	0.534143	0.61669	0.876705	0.888282	0.971913	0.967437	0.987602	0.981076	0.541341	0.623738	0.882419	0.897394	0.99	0.984594	0.99	0.99	7127	17790	23371	27051	19202	33364	19001	36097	7987	19699	7895	9086	3414	5055	1581
P1D02	P1	D02	5195	12135	11342	11781	7920	7348	4700	4252	9066	16932	24071	20788	27105	22918	29644	24750	0.36428	0.417484	0.320278	0.361724	0.226124	0.242781	0.136851	0.146611	0.369189	0.422255	0.322365	0.365435	0.231457	0.247086	0.138421	0.149226	6744	12698	7850	8261	4853	5663	2552	3302	13022	20064	26427	19631	27540	24265	25309
P1D03	P1	D03	5299	16277	28588	26656	34462	33519	37031	33051	6363	16239	9384	9715	4993	5356	2447	2335	0.454382	0.500584	0.752871	0.732892	0.873451	0.862225	0.938016	0.934013	0.460505	0.506306	0.757778	0.74041	0.894052	0.877516	0.948779	0.950674	7168	18412	20219	23888	18741	34030	16822	36117	7644	19787	6708	7834	3371	4556	1656
P1D04	P1	D04	5598	16474	20029	18079	21668	17685	18408	17054	7056	18962	18940	19974	17846	21181	21093	21719	0.44239	0.464894	0.513973	0.475101	0.548363	0.455025	0.466014	0.439842	0.448351	0.470208	0.517323	0.479974	0.561296	0.463094	0.471361	0.447688	7012	18553	12521	17978	9802	17710	9585	16785	7800	20190	13729	18478	12148	20947	12535
P1D05	P1	D05	5108	16031	23508	23917	28278	29565	31095	30788	6794	18003	15318	11136	10924	8578	8157	5581	0.429172	0.471029	0.605471	0.68231	0.721341	0.775109	0.792189	0.846545	0.434955	0.476413	0.609417	0.689309	0.738354	0.788855	0.801279	0.861646	7011	17357	15304	21417	13752	25246	13401	27943	8097	19017	10852	13217	7211	11544	5457
P1D06	P1	D06	5139	15954	26748	22022	31459	28550	34234	31526	6796	18326	12384	15320	7925	9748	5153	6147	0.430582	0.465403	0.683533	0.589738	0.798776	0.74547	0.86917	0.836833	0.436385	0.470722	0.687988	0.595788	0.817616	0.75869	0.879143	0.85176	6780	17677	16445	19392	15666	27205	12733	30199	7967	19656	10382	12217	6304	10528	3371
P1D07	P1	D07	4927	16400	35134	29444	38026	37307	38656	35602	3174	8292	4407	3807	1537	1747	815	728	0.608197	0.664183	0.888546	0.885507	0.961151	0.955267	0.979352	0.979961	0.616392	0.671774	0.894338	0.894591	0.98382	0.972208	0.99	0.99	6731	20795	16242	27716	16942	37335	14628	37699	3068	9671	1493	4585	886	1501	513
P1D08	P1	D08	3692	16783	34362	28462	37840	37171	38746	35778	2408	9116	5225	3908	1687	1955	761	901	0.605246	0.648017	0.868012	0.879271	0.95732	0.950033	0.980738	0.975436	0.613402	0.655424	0.87367	0.88829	0.979899	0.966881	0.99	0.99	7319	20551	21267	24115	17890	36169	16704	37211	3251	10423	2053	5862	817	2645	543
P1D09	P1	D09	5045	15662	34192	29087	37743	37486	38417	34891	3337	8003	5360	3218	1799	1584	1125	765	0.601885	0.661821	0.864482	0.900387	0.954504	0.959457	0.971549	0.978545	0.609996	0.669386	0.870117	0.909623	0.977017	0.976472	0.982697	0.99	6632	21405	19554	24955	17517	35517	18601	37451	4326	14531	3200	6764	1259	3095	766
P1D10	P1	D10	5305	16373	34518	29679	34920	37299	38121	35547	3468	8575	5031	3327	1600	1750	823	907	0.604696	0.656285	0.872791	0.8992	0.956188	0.955185	0.978867	0.975119	0.612845	0.663786	0.878479	0.908424	0.978741	0.972124	0.99	0.99	6896	20588	21791	26827	17909	37012	17187	37848	2594	8964	1867	4642	636	1813	499
P1D11	P1	D11	5144	12979	19513	19289	21111	21045	21274	18990	7179	15124	18798	17661	17589	15860	17051	12432	0.417431	0.461837	0.509332	0.52203	0.545504	0.570248	0.555095	0.604354	0.423056	0.467115	0.512651	0.527385	0.55837	0.580361	0.561464	0.615134	6634	17279	13837	17960	11049	22998	11664	24571	7726	19743	11289	13512	7737	13628	7440
P1D12	P1	D12	5647	16827	36207	31186	38236	37465	38818	38159	3679	8790	3359	3613	1339	1585	712	880	0.605511	0.656868	0.915104	0.896175	0.966166	0.959411	0.981988	0.977458	0.613671	0.664376	0.921068	0.905368	0.988953	0.976425	0.99	0.99	7332	22419	20291	33214	17265	36829	17480	37702	3292	10604	1703	3666	998	2071	520
P1E01	P1	E01	5810	17202	25473	26133	31383	31000	33485	33737	7806	19113	13685	12090	8035	7654	5923	4965	0.426704	0.473689	0.650518	0.683698	0.796159	0.801987	0.849701	0.871712	0.432454	0.479103	0.654758	0.690712	0.814937	0.816209	0.85945	0.887261	7454	17715	20646	21679	17311	31327	17243	33708	8788	19999	10592	8775	5676	6968	3536
P1E02	P1	E02	5795	15854	26835	24378	32326	30920	35189	32659	7565	18088	12279	12873	7098	7704	4277	4739	0.433757	0.467091	0.686071	0.654425	0.819957	0.800539	0.891628	0.873282	0.439603	0.47243	0.690543	0.661138	0.839296	0.814735	0.901859	0.888859	7075	16507	18407	21533	16911	29267	15722	32236	10084	20270	10217	10201	6152	8292	3689
P1E03	P1	E03	5613	15601	25831	25182	30936	30688	33818	31724	7218	18605	13326	12465	8409	7873	5584	4792	0.437456	0.45609	0.659678	0.668898	0.786275	0.79583	0.858281	0.86877	0.443351	0.461302	0.663977	0.675759	0.80482	0.809943	0.868129	0.884267	6728	17468	16026	18902	15683	29454	16666	32262	7886	19791	8754	10504	5188	8419	3564
P1E04	P1	E04	5335	14331	24157	24425	29959	30626	32899	31940	6978	16869	14947	12529	9418	7986	6488	4856	0.433282	0.459327	0.617763	0.660957	0.760825	0.793173	0.835276	0.868029	0.439121	0.464577	0.621789	0.667737	0.778769	0.807239	0.84486	0.883513	6994	17447	15964	23472	16605	29051	16006	32425	8485	20331	9336	12408	5932	9089	3316
P1E05	P1	E05	5279	15368	23799	23572	29504	29343	32368	31015	6974	17995	15176	14428	9793	9069	6973	5802	0.430833	0.46063	0.610622	0.620316	0.750795	0.763902	0.822755	0.84241	0.436639	0.465895	0.614602	0.626679	0.768503	0.777449	0.832195	0.857436	6802	17032	14890	17779	13344	26278	14932	28803	8248	18532	10685	11795	6359	10314	5067
P1E06	P1	E06	5268	15641	25867	25176	30769	30534	33493	30722	6976	18101	13302	11795	8606	7963	5804	4428	0.430252	0.463547	0.660395	0.680966	0.781435	0.793153	0.852304	0.874026	0.436049	0.468845	0.664699	0.687951	0.799865	0.807218	0.862084	0.889616	6726	16710	14249	17304	14230	24632	12460	27576	8627	19731	11710	12286	8627	12065	6100
P1E07	P1	E07	5488	16655	35270	30780	37843	37419	38538	34760	3431	8904	4286	3415	1681	1668	934	814	0.615316	0.65163	0.891647	0.900132	0.957469	0.957326	0.976338	0.977118	0.623607	0.659077	0.897459	0.909365	0.980051	0.974303	0.98754	0.99	6971	21230	13907	15240	12016	21793	10367	20741	4085	13242	6284	13937	6143	16170	5679
P1E08	P1	E08	5522	15679	34069	28911	37582	37176	38562	33525	3343	7994	5500	3835	1995	1876	1013	793	0.622899	0.662316	0.861002	0.882886	0.949592	0.951961	0.974403	0.976893	0.631293	0.669886	0.866614	0.891943	0.971989	0.968844	0.985584	0.99	6946	20946	15067	20742	13981	31272	14478	31424	3545	11710	5073	9135	3725	7713	3045
P1E09	P1	E09	5304	16276	34138	28259	37573	37145	38060	32991	3305	8641	5427	3852	2019	1971	1279	752	0.616099	0.653209	0.862833	0.880041	0.949005	0.949611	0.967488	0.977714	0.624402	0.660675	0.868457	0.889069	0.971388	0.966452	0.978589	0.99	7067	20438	19900	26997	19506	36699	18943	38042	2757	8429	1869	5023	872	1920	805
P1E10	P1	E10	5391	16673	34869	29007	38104	37131	38820	33884	3337	8597	4758	4210	1483	2028	729	699	0.617667	0.659794	0.87993	0.873258	0.962538	0.948211	0.981567	0.979788	0.625991	0.667335	0.885666	0.882216	0.98524	0.965027	0.99	0.99	6969	20701	19070	24646	20474	36275	17590	37219	3364	10539	2717	6075	1311	2570	802
P1E11	P1	E11	4219	16499	19202	18275	21455	20138	21258	21402	5679	17455	17891	17180	16317	15857	16412	14669	0.426248	0.485922	0.517672	0.515442	0.568013	0.559467	0.564322	0.59333	0.431992	0.491476	0.521046	0.52073	0.58141	0.569388	0.570797	0.603913	6327	17433	13787	16297	14009	20899	10168	22109	7243	18127	10774	14049	9243	14738	6433
P1E12	P1	E12	4440	17202	34931	29751	38141	37227	38610	38120	2911	8987	4607	4132	1445	1865	960	1014	0.603999	0.656841	0.883479	0.878051	0.963497	0.952292	0.975739	0.974089	0.612139	0.664348	0.889238	0.887058	0.986222	0.96918	0.986935	0.99	7090	21999	22355	23868	20633	37044	19359	37623	2604	8490	1725	4507	825	1829	343
P1F01	P1	F01	5239	17095	25467	26376	31963	31402	34546	33870	6852	18299	13616	11924	7407	7212	4928	4065	0.433297	0.482991	0.651613	0.688668	0.811862	0.813228	0.875158	0.892843	0.439136	0.488512	0.65586	0.695733	0.83101	0.82765	0.8852	0.908769	6584	16238	21392	18488	16387	24881	17717	28832	8988	20307	12164	13198	7213	12112	4752
P1F02	P1	F02	5428	14907	25177	26681	30607	31342	33374	31906	7104	16478	13956	11683	8775	7253	6015	4320	0.433131	0.474972	0.64337	0.69547	0.777182	0.812074	0.847292	0.880749	0.438968	0.480401	0.647563	0.702604	0.795513	0.826475	0.857014	0.896459	6797	17031	16637	22642	16959	28224	15804	30763	7885	20188	9598	11795	7261	9411	4256
P1F03	P1	F03	5467	15789	26325	25774	31440	31606	34724	31641	7141	18205	12844	12399	7985	7174	4699	3915	0.433614	0.464464	0.672088	0.675189	0.797464	0.815008	0.880806	0.889892	0.439457	0.469773	0.676468	0.682115	0.816272	0.829461	0.890912	0.905766	6862	16980	16006	19535	15588	26564	15970	30304	8666	20224	10758	12571	6915	11061	3995
P1F04	P1	F04	4391	15394	26117	24127	31377	29653	34008	31048	6001	18559	12987	13989	8017	8893	5410	5352	0.422537	0.453391	0.667886	0.632989	0.796492	0.769289	0.862753	0.852967	0.42823	0.458574	0.672239	0.639482	0.815277	0.782931	0.872652	0.868182	6911	16651	14983	17728	14468	24804	16611	28067	8934	20600	10939	13588	7050	12804	5213
P1F05	P1	F05	5371	15805	24710	23938	30101	28957	33839	30739	7434	19112	14233	13956	9127	9356	5552	5512	0.419446	0.452645	0.634517	0.63171	0.767335	0.755801	0.859054	0.847949	0.425098	0.457818	0.638653	0.63819	0.785433	0.769204	0.868911	0.863074	7094	16047	15137	18365	14565	24029	13844	26770	9449	21121	12234	13614	9597	13237	7188
P1F06	P1	F06	5322	16800	34273	29287	37858	37084	38411	34422	3289	9191	5300	4118	1754	1996	1143	752	0.618047	0.646378	0.86607	0.876725	0.95572	0.948925	0.971103	0.978621	0.626375	0.653765	0.871715	0.885718	0.978262	0.965754	0.982245	0.99	6985	19886	18476	27419	20932	37130	18382	37929	3494	9425	2109	4515	1347	1674	762
P1F07	P1	F07	3897	16158	35167	29202	38102	36776	38714	33710	2426	9024	4446	4338	1477	2332	862	1135	0.616321	0.641649	0.887764	0.870662	0.962682	0.94037	0.978219	0.967427	0.624627	0.648983	0.89355	0.879593	0.985388	0.957047	0.989443	0.984684	7151	19884	19569	27061	19517	35982	17924	35748	3954	10820	2102	5328	1172	2919	753
P1F08	P1	F08	5223	16874	34917	30177	37925	37145	38784	34038	3286	9187	4618	3729	1633	1946	778	885	0.613821	0.647481	0.883192	0.890019	0.958719	0.950219	0.980335	0.974659	0.622092	0.654881	0.888949	0.899149	0.981331	0.96707	0.99	0.99	7218	19334	10953	14744	10110	17962	8093	16521	6203	16956	9436	16496	10404	20777	11045
P1F09	P1	F09	5075	19206	35053	29412	37884	37395	38781	32529	3211	9604	4481	4529	1698	1781	774	754	0.612479	0.666644	0.886655	0.866563	0.957102	0.954538	0.980432	0.977346	0.620732	0.674263	0.892434	0.875452	0.979675	0.971466	0.99	0.99	7510	19331	20177	25464	19524	36022	20136	37356	4438	10947	2572	5608	1513	2896	839
P1F10	P1	F10	5051	18885	33840	28203	37854	37270	38590	34933	3263	9654	5759	4192	1761	1873	996	795	0.607529	0.661726	0.854567	0.870597	0.955547	0.95215	0.97484	0.977749	0.615716	0.669289	0.860137	0.879528	0.978084	0.969035	0.986025	0.99	6810	20122	19938	30713	16822	35913	19563	37294	3623	10653	2530	5242	1241	3012	995
P1F11	P1	F11	4975	15956	17613	17102	19512	18071	18462	18375	7154	20297	20309	19294	18932	18336	19802	18033	0.410174	0.440129	0.464453	0.469887	0.507543	0.496361	0.48249	0.504697	0.415701	0.44516	0.467481	0.474707	0.519514	0.505163	0.488026	0.513699	6725	16953	12041	17968	11225	19928	10635	20158	8548	19395	13431	15223	12930	15993	11931
P1F12	P1	F12	5167	23314	35110	31019	37694	37176	38511	38227	3265	12195	4470	4507	1851	2005	1067	911	0.612785	0.656566	0.887064	0.873135	0.953193	0.948827	0.973041	0.976723	0.621042	0.66407	0.892846	0.882092	0.975674	0.965654	0.984205	0.99	6895	20535	15465	18035	14283	27705	11979	29232	4501	14439	6709	10257	5810	11301	4500
P1G01	P1	G01	5429	18312	23645	26579	28184	30785	31699	29267	7419	19491	15141	11410	10839	7568	7594	4636	0.422556	0.484406	0.609627	0.69965	0.722241	0.802675	0.806734	0.863257	0.42825	0.489943	0.613601	0.706827	0.739275	0.81691	0.815991	0.878655	7512	17349	20176	17265	16154	25958	16151	29164	9012	19538	12502	13540	7332	11249	4545
P1G02	P1	G02	5226	17505	25188	25270	30762	30896	33874	33986	6876	20554	13882	12930	8621	7780	5592	4700	0.431829	0.459944	0.644689	0.661518	0.781098	0.798842	0.858308	0.878509	0.437649	0.465201	0.648891	0.668304	0.799521	0.813008	0.868157	0.89418	7433	17297	16029	22148	16605	29166	16627	32504	9090	19903	9347	11655	5673	8745	3611
P1G03	P1	G03	4636	17943	27091	25927	32851	30829	35609	32454	5641	20194	11820	12446	6598	7864	3860	4655	0.451104	0.470488	0.69623	0.675657	0.832746	0.796759	0.902202	0.874559	0.457183	0.475865	0.700768	0.682588	0.852387	0.810889	0.912554	0.890159	6908	17628	15918	20081	17670	26671	16796	30203	8681	20045	8563	14126	5673	11434	3416
P1G04	P1	G04	5419	16913	24582	25474	30182	30722	33325	33214	7458	21020	14461	12732	9174	7883	6070	4709	0.420828	0.445865	0.629614	0.666754	0.766897	0.795804	0.84592	0.875827	0.426499	0.450961	0.633717	0.673593	0.784985	0.809916	0.855626	0.89145	6796	15683	13429	18866	14040	23145	14584	26502	9665	20928	11977	15577	9021	13772	6536
P1G05	P1	G05	5462	17227	26630	24577	32307	30071	35103	32216	7362	20766	12289	13532	7146	8513	4380	5072	0.42592	0.453426	0.684242	0.644913	0.818873	0.779365	0.889066	0.863978	0.43166	0.458608	0.688701	0.651529	0.838187	0.793186	0.899268	0.879389	7068	17291	16294	22836	17887	27872	16317	31431	8557	19808	9264	12641	6618	9913	3873
P1G06	P1	G06	5623	18068	25268	24090	30991	29581	34274	32215	6477	19927	13781	14077	8387	9001	5196	4964	0.464711	0.475536	0.647084	0.631174	0.787013	0.766705	0.868356	0.866484	0.470973	0.480971	0.651302	0.637648	0.805575	0.780301	0.878319	0.88194	7338	18031	15401	24018	17660	28142	16087	31472	7820	19387	8457	13251	5887	9984	3882
P1G07	P1	G07	4533	20860	35001	29247	38035	37340	38721	35818	2882	11007	4560	4074	1525	1711	840	599	0.611328	0.654596	0.884735	0.877735	0.961451	0.956186	0.978767	0.983552	0.619566	0.662077	0.890502	0.886739	0.984127	0.973142	0.989998	0.99	6773	18852	18893	26282	21657	36585	18799	37800	3953	11344	2916	4887	1670	2334	865
P1G08	P1	G08	5416	20878	33965	27055	37818	36818	38583	32096	3362	11640	5625	4584	1808	2268	995	815	0.616997	0.642044	0.857919	0.855116	0.954373	0.941974	0.97486	0.975236	0.625311	0.649383	0.863511	0.863887	0.976883	0.958679	0.986046	0.99	6421	20152	13292	20774	12842	24435	11822	23672	4169	14916	7729	13455	6665	14616	6397
P1G09	P1	G09	5256	21505	32931	30814	37847	37747	38526	34223	3420	11976	5097	3707	1761	1480	994	635	0.605809	0.642305	0.865967	0.892616	0.955539	0.962271	0.974848	0.981783	0.613973	0.649646	0.871611	0.901773	0.978076	0.979336	0.986034	0.99	7197	20211	19350	29837	19524	36267	19106	37367	3131	9544	2575	4621	1231	2676	868
P1G10	P1	G10	5403	20833	28322	23134	33677	32141	32412	30237	3757	12799	11309	8493	5980	7098	7164	4372	0.589847	0.61944	0.714643	0.731464	0.849207	0.819109	0.818981	0.873674	0.597796	0.62652	0.719301	0.738967	0.869236	0.833635	0.828378	0.889259	6720	18855	13166	19698	12765	21006	10072	21034	5380	14627	8059	15496	8625	17006	7426
P1G11	P1	G11	5455	16709	20427	19472	22725	21000	23366	22632	7218	19774	17563	17177	15727	15897	15081	14271	0.430443	0.457994	0.537694	0.531311	0.590997	0.569152	0.607746	0.613283	0.436243	0.463229	0.541199	0.536761	0.604936	0.579245	0.614719	0.624223	6879	17100	13684	14483	15195	19571	13413	22127	8415	19519	10939	15693	10146	16620	7523
P1G12	P1	G12	5408	19350	32493	27814	34995	23100	36039	11331	5767	16906	6512	7961	4392	12126	3390	19135	0.483937	0.533705	0.833047	0.77747	0.888491	0.655766	0.914023	0.371923	0.490459	0.539805	0.838477	0.785446	0.909447	0.667395	0.92451	0.378557	7472	16596	13066	14928	13287	20366	12941	21668	9621	19813	14503	14266	13458	16001	11207
P1H01	P1	H01	5545	17866	24511	27898	29871	32001	33026	34923	8116	20203	14590	10602	9518	6645	6411	4097	0.4059	0.469306	0.626864	0.724623	0.758359	0.828055	0.837437	0.895003	0.41137	0.47467	0.63095	0.732057	0.776245	0.842739	0.847046	0.910967	7624	17225	22093	15809	17956	29022	18457	32142	10388	20214	14327	9825	7638	9058	4850
P1H02	P1	H02	5580	17842	26327	26498	31205	31013	34273	34351	7756	20221	12842	11650	8164	7708	5178	4626	0.418416	0.468749	0.672139	0.69461	0.792629	0.800935	0.868749	0.881315	0.424055	0.474107	0.67652	0.701736	0.811323	0.815139	0.878717	0.897035	7140	16989	19796	22402	19731	27227	18871	30823	9532	20187	8227	13544	5158	10483	2923
P1H03	P1	H03	5014	17582	25020	25072	30029	30172	32873	33536	6812	20363	14105	13074	9293	8335	6559	5338	0.423981	0.463355	0.639489	0.657264	0.763669	0.783546	0.833663	0.862685	0.429694	0.468651	0.643657	0.664006	0.781681	0.797441	0.843229	0.878073	7170	17113	17240	19925	18101	25312	16338	28611	9372	19411	9758	13600	7565	11649	4439
P1H04	P1	H04	5445	16808	24804	25729	30142	30211	33259	33836	7819	21001	14220	12535	9222	8332	6119	5066	0.41051	0.44455	0.635609	0.672407	0.765725	0.783826	0.844609	0.869775	0.416041	0.449631	0.639752	0.679305	0.783785	0.797726	0.8543	0.88529	6917	16958	18263	20638	19466	25024	17268	28843	9120	20148	7691	15487	5926	12372	3463
P1H05	P1	H05	5493	17823	26610	25730	31442	30537	34386	34163	7241	20402	12653	12651	7826	8104	5109	4809	0.431365	0.466266	0.677737	0.670384	0.800703	0.790275	0.870642	0.876604	0.437178	0.471595	0.682155	0.677261	0.819588	0.804289	0.880632	0.89224	7240	18414	17989	24303	18035	28879	17990	31728	8003	18717	6999	11736	4832	9027	3473
P1H06	P1	H06	5164	17458	25542	26209	31478	30989	34978	34298	6912	20456	13418	12109	7870	7713	4489	4677	0.427625	0.460463	0.655595	0.683987	0.79999	0.800708	0.886259	0.88	0.433387	0.465726	0.659869	0.691003	0.818858	0.814908	0.896429	0.895697	7453	15914	15989	18219	18227	21410	16555	24858	10499	21005	9668	17416	7924	15602	5154
P1H07	P1	H07	5404	21557	35052	34897	37872	37568	38535	38225	3434	11804	4520	3479	1792	1648	1046	1079	0.611451	0.646174	0.885778	0.909344	0.95482	0.957976	0.973573	0.972547	0.61969	0.653559	0.891551	0.918672	0.97734	0.974965	0.984744	0.989895	7548	20103	13756	24024	13141	24513	10893	23696	5248	14959	8379	14776	8999	14599	8080
P1H08	P1	H08	5277	21828	34767	32431	38020	37380	38574	38480	3517	11754	4820	4333	1629	1939	1023	861	0.600068	0.649991	0.878243	0.88214	0.958914	0.950685	0.974165	0.978114	0.608154	0.65742	0.883967	0.891189	0.981531	0.967545	0.985343	0.99	7437	20370	19456	27471	19680	33612	18028	35781	4391	12422	4367	7151	3058	5421	1716
P1H09	P1	H09	5335	21980	34554	32290	37982	37387	38708	38363	3458	12454	5020	4446	1645	1952	863	920	0.606733	0.638323	0.873149	0.878974	0.958488	0.95038	0.978191	0.97658	0.614909	0.645618	0.87884	0.887991	0.981094	0.967234	0.989415	0.99	7339	20025	21930	28453	23185	36286	18435	38031	4049	11631	2637	5448	1113	2710	510
P1H10	P1	H10	5056	21697	36497	32952	38484	37857	38907	38408	3008	11799	3083	2845	1165	1440	687	747	0.626984	0.647749	0.922107	0.920524	0.970617	0.963356	0.982649	0.980922	0.635433	0.655152	0.928117	0.929967	0.99	0.98044	0.99	0.99	6699	20006	16317	18639	17561	27827	14648	26797	4088	13796	5225	9695	5129	11325	4180
P1H11	P1	H11	5243	16727	19966	17915	21908	19668	22996	21233	7120	19209	17214	18029	15963	16477	15058	15068	0.424088	0.465466	0.537009	0.498414	0.57849	0.544142	0.604299	0.584915	0.429803	0.470786	0.540509	0.503527	0.592134	0.553791	0.611233	0.595349	6769	17725	13605	14761	12077	20584	9956	20640	7765	19526	13034	12478	12573	16066	10525
P1H12	P1	H12	5766	23783	35285	32763	38206	37140	38785	38377	3739	12997	4306	4594	1453	2149	827	924	0.606628	0.646629	0.891238	0.877024	0.963363	0.945303	0.979122	0.976489	0.614803	0.654019	0.897047	0.886021	0.986084	0.962067	0.99	0.99	8528	23134	26353	34472	25843	36811	17307	38051	5244	13276	2846	4573	1520	2344	1100
P2A01	P2	A01	19659	5601	27098	24148	26678	29022	35266	33444	19018	6781	11626	15419	6032	10609	4173	6232	0.508287	0.45235	0.699773	0.610307	0.815592	0.732306	0.894191	0.842928	0.512088	0.459286	0.70441	0.61752	0.822805	0.771962	0.902216	0.8556	18111	11494	19553	16834	22024	18609	25137	18110	19149	13589	18396	10492	15995	8349	13261
P2A02	P2	A02	5	104	25	34	65	30	37	21	16	108	31	31	104	34	57	22																	32	76	22	178	41	205	88	286	34	135	14	274	35	238	34
P2A03	P2	A03	21628	5408	32104	32006	36164	34906	37916	37513	17061	4159	6897	7624	3257	4833	1677	2253	0.559022	0.565276	0.823158	0.80762	0.917379	0.878381	0.957644	0.943344	0.563203	0.573944	0.828614	0.817166	0.925492	0.925949	0.966238	0.957525	18349	10547	22337	15217	26262	14944	29344	17209	20297	13076	16126	11248	12329	7470	9438
P2A04	P2	A04	21458	6242	30796	31340	34559	33776	36837	36698	17170	4713	8152	8315	4724	5953	2711	3100	0.555504	0.569785	0.790695	0.790316	0.879744	0.85016	0.93145	0.922107	0.559658	0.578522	0.795935	0.799657	0.887525	0.896199	0.93981	0.935969	19218	9219	23125	12901	26669	14622	30049	15860	19024	12450	15181	11641	11811	9596	8678
P2A05	P2	A05	22039	6159	31538	28527	34954	32329	36710	36145	16859	4364	7591	11095	4267	7355	2856	3652	0.566584	0.585289	0.806001	0.719979	0.891206	0.814661	0.927817	0.908234	0.570822	0.594263	0.811342	0.728488	0.899088	0.858777	0.936144	0.921888	19941	10035	24765	14400	28165	15076	30595	16006	18808	11193	13829	10281	10612	7423	8418
P2A06	P2	A06	21313	6321	31219	29681	35451	34042	37462	37266	17232	4572	7886	9957	3955	5657	2115	2499	0.552938	0.580281	0.798338	0.748802	0.899635	0.857503	0.94656	0.937156	0.557073	0.589178	0.803628	0.757652	0.907591	0.903939	0.955055	0.951245	18999	10569	23886	15471	27628	16060	30775	16944	19182	13607	14188	10981	10907	7609	7875
P2A07	P2	A07	23388	6188	30381	29359	32584	31408	34348	34032	13905	2938	9106	10382	6838	8297	5265	5722	0.627142	0.678063	0.769392	0.738758	0.826544	0.791034	0.867089	0.856065	0.631832	0.688459	0.774491	0.74749	0.833854	0.833871	0.874871	0.868934	26164	11554	30412	14280	32972	14717	34186	16499	13407	6891	7723	5911	6478	4331	5191
P2A08	P2	A08	21736	5908	30167	29360	31480	32370	33152	34360	12710	2723	9333	10092	8033	7348	6516	5412	0.631017	0.684509	0.763722	0.744195	0.7967	0.814996	0.835737	0.863924	0.635736	0.695005	0.768783	0.752991	0.803746	0.859131	0.843237	0.876912	26107	8986	23438	13663	29996	13055	31362	12476	13526	5301	9114	6877	9540	5314	8052
P2A09	P2	A09	22495	6130	27351	29074	30153	31595	32089	33463	13044	3155	10948	10708	9328	8165	7579	6341	0.632967	0.660205	0.714144	0.730833	0.763734	0.794643	0.808939	0.840694	0.6377	0.670327	0.718877	0.739471	0.770489	0.837675	0.816199	0.853333	25189	11098	26182	13529	29268	13250	29262	13470	14400	7861	9852	6717	10281	6192	10154
P2A10	P2	A10	22593	5933	28312	28687	30699	30773	32430	32936	13447	3033	11173	11047	8795	8926	7189	6841	0.626887	0.661722	0.717032	0.721976	0.777308	0.775158	0.818547	0.828016	0.631575	0.671868	0.721784	0.730509	0.784183	0.817136	0.825893	0.840464	25477	10584	30972	13823	33417	13729	34643	14798	14132	6899	7994	6846	6109	4645	4719
P2A11	P2	A11	20853	6051	28472	22903	31956	27922	34308	31820	17604	6624	10244	16648	7210	11782	5063	7939	0.542242	0.477396	0.735407	0.579075	0.815912	0.703254	0.871403	0.800322	0.546297	0.484716	0.74028	0.585919	0.823128	0.741338	0.879223	0.812354	19321	10887	23006	14950	23755	14648	24537	16043	18327	12883	15149	9973	14517	8714	13760
P2A12	P2	A12	20627	7845	29941	39325	34090	38656	34511	39337	18380	168	9205	432	5228	1145	4875	468	0.528803	0.979034	0.764855	0.989134	0.867033	0.971232	0.876225	0.988243	0.532757	0.99	0.769923	0.99	0.874701	0.99	0.884089	0.99	21223	13604	27523	16896	28846	18831	24297	17949	17618	11355	11578	6577	10297	5737	14641
P2B01	P2	B01	21142	5216	30809	28325	35423	33604	37023	36616	17285	4877	8194	11380	3936	6145	2564	3187	0.550186	0.516794	0.789914	0.713386	0.899997	0.845405	0.935231	0.919931	0.554301	0.524718	0.795148	0.721818	0.907957	0.891186	0.943625	0.93376	19094	10266	25503	17760	28068	15378	30872	20641	18788	12324	13227	6775	10857	4524	8190
P2B02	P2	B02	21968	5352	32123	29075	35939	34594	37846	37462	16402	4395	6955	9913	3288	5167	1672	2326	0.572531	0.549092	0.822023	0.745742	0.91618	0.870049	0.95769	0.94154	0.576813	0.557511	0.82747	0.754556	0.924283	0.917165	0.966285	0.955695	19659	11021	24684	15118	29118	15446	31573	17859	18596	11627	13886	6795	9855	4626	7268
P2B03	P2	B03	21674	5069	30540	28076	34170	31119	36241	35331	16763	4119	8445	11551	5153	8584	3238	4383	0.563884	0.551698	0.783378	0.708507	0.868957	0.783795	0.917982	0.889636	0.568101	0.560157	0.78857	0.71688	0.876642	0.82624	0.92622	0.90301	21054	10269	24357	13962	28363	14590	31286	15246	17326	11516	14128	8245	10384	5999	7585
P2B04	P2	B04	20669	4649	32640	30270	36012	34390	37829	37444	17767	3437	6417	9417	3292	5372	1706	2330	0.537751	0.574944	0.835702	0.762718	0.916243	0.864896	0.956848	0.941419	0.541773	0.58376	0.84124	0.771733	0.924346	0.911733	0.965436	0.955572	19050	10416	24574	15750	29333	14957	32899	16731	19457	12730	14136	8816	9716	5205	6176
P2B05	P2	B05	20387	4752	29009	28336	32919	31895	35860	35571	18159	3842	9627	11240	6165	7784	3518	4178	0.528901	0.552944	0.750828	0.715989	0.842263	0.803826	0.910661	0.89489	0.532856	0.561422	0.755804	0.724452	0.849712	0.847356	0.918834	0.908344	20045	10148	26955	16027	30088	15127	32848	16555	18395	11858	11570	7211	8697	4720	6225
P2B06	P2	B06	21553	5376	30917	29511	35323	33791	37611	37065	16550	4174	7968	10182	3847	5932	1901	2710	0.565651	0.562932	0.795088	0.743481	0.901787	0.850666	0.951888	0.931867	0.569881	0.571563	0.800357	0.752268	0.909763	0.896732	0.960431	0.945876	20139	10724	26434	15398	30031	14750	32903	16803	18708	11588	12172	7655	9018	4336	6173
P2B07	P2	B07	22365	5820	30556	29893	31737	31532	31012	33697	12687	2799	8946	9846	6396	8229	4822	6095	0.638052	0.675252	0.77353	0.752233	0.832271	0.793038	0.865435	0.846829	0.642824	0.685606	0.778657	0.761124	0.839632	0.835984	0.873202	0.859559	20973	10953	23304	12530	26669	11770	29420	13167	12702	7565	10786	6904	10721	5478	10068
P2B08	P2	B08	21782	5887	29116	28930	29396	30587	31392	32403	12116	2814	10283	10817	7005	9156	6010	7376	0.642575	0.676589	0.739004	0.727854	0.80756	0.76962	0.839313	0.814576	0.647381	0.686963	0.743901	0.736456	0.814702	0.811297	0.846846	0.826821	23943	10929	24904	13683	29758	12286	33172	15113	13744	6454	8259	5347	7716	3915	6260
P2B09	P2	B09	21732	5866	30314	29939	32472	28051	34287	33808	12409	2816	9189	9799	7102	6775	5362	5962	0.636537	0.675651	0.767385	0.75341	0.820539	0.805461	0.864763	0.850088	0.641297	0.68601	0.77247	0.762314	0.827796	0.84908	0.872524	0.862868	23406	10905	27555	12421	31201	11167	33880	13800	12746	6458	8256	5847	6920	3951	5572
P2B10	P2	B10	21263	5868	30903	29517	31774	31694	33107	33727	11468	2785	8515	10235	6330	8048	5083	6039	0.649629	0.678146	0.783982	0.742529	0.833876	0.797494	0.866902	0.848137	0.654487	0.688544	0.789177	0.751304	0.841251	0.840681	0.874682	0.860887	23027	9929	25256	12913	30499	13743	33171	15136	12597	5712	8751	5499	7947	4059	6268
P2B11	P2	B11	20504	5858	29560	27859	32847	31814	35059	34913	15154	4932	9188	11821	6488	7905	4306	4848	0.575018	0.54291	0.762878	0.702092	0.835058	0.800977	0.890613	0.878071	0.579319	0.551234	0.767934	0.71039	0.842443	0.844352	0.898606	0.891272	18956	10308	21261	12374	21389	10861	22411	11080	18718	12008	16482	10881	16406	8939	15649
P2B12	P2	B12	21011	6885	27394	28178	28849	31965	32716	33601	12221	3666	10107	11603	7633	7769	6859	6185	0.632252	0.652545	0.730487	0.708328	0.790774	0.804475	0.826684	0.844543	0.636981	0.66255	0.735328	0.7167	0.797767	0.84804	0.834103	0.85724	23814	10416	23756	14780	29893	15573	31781	15968	13850	6523	9563	4889	9214	3890	7689
P2C01	P2	C01	20568	4703	30811	29880	35239	34895	37467	37419	17578	3893	8110	9784	3942	4869	1999	2363	0.539192	0.547115	0.791629	0.753328	0.89939	0.877553	0.949349	0.940601	0.543224	0.555504	0.796875	0.762231	0.907344	0.925075	0.957869	0.954742	20644	10919	27709	15210	30922	15195	32979	17945	17802	12641	11135	7503	8091	5130	6125
P2C02	P2	C02	21823	5904	31902	30800	36292	35036	37857	37707	16308	4670	7049	8884	3098	4718	1679	2082	0.572316	0.558351	0.819029	0.776131	0.921351	0.88132	0.957532	0.947674	0.576597	0.566912	0.824457	0.785304	0.929499	0.929047	0.966126	0.961921	20530	9352	29335	15475	32454	14491	34809	16818	17811	10941	9484	6485	6512	4031	4444
P2C03	P2	C03	22194	5575	32429	30414	36340	34398	38000	37417	15886	4192	6597	9281	3026	5386	1489	2359	0.582826	0.5708	0.830959	0.766192	0.923132	0.864619	0.962293	0.940693	0.587185	0.579552	0.836466	0.775248	0.931296	0.911441	0.970929	0.954835	20777	10424	26162	13486	29909	13106	32674	16882	17712	11417	12377	8332	9132	5347	6456
P2C04	P2	C04	21101	5808	30825	28947	34298	32748	36342	36001	16729	4625	8030	10694	4773	6993	3014	3776	0.557785	0.556695	0.793334	0.730229	0.877838	0.824036	0.923417	0.905071	0.561956	0.565231	0.798592	0.738859	0.885601	0.86866	0.931704	0.918677	19729	10309	25034	13420	28201	12772	31321	14579	18301	11835	13328	9053	10475	6375	7562
P2C05	P2	C05	21234	6147	30633	30644	35209	34482	37451	37562	15887	4449	8137	9072	4176	5288	1992	2204	0.572021	0.580125	0.790121	0.771578	0.89397	0.867035	0.949497	0.944576	0.576299	0.589019	0.795357	0.780697	0.901876	0.913988	0.958018	0.958776	20631	10156	27803	13679	31145	13455	33568	16401	18035	10576	10931	7671	7925	5100	5571
P2C06	P2	C06	20733	6346	31342	29754	35593	33903	37865	37380	15428	4619	7595	9939	3713	5872	1603	2421	0.573353	0.578751	0.804941	0.749603	0.905536	0.85237	0.959385	0.939172	0.577641	0.587624	0.810276	0.758463	0.913545	0.898528	0.967995	0.953291	20411	11169	25888	10657	29584	13100	33188	17312	18049	11622	12517	5611	9176	4249	5826
P2C07	P2	C07	20656	6183	29185	29362	29027	31652	31788	33815	11621	2846	10306	10395	6635	8117	5263	5981	0.63996	0.684793	0.739029	0.738537	0.813948	0.795896	0.857953	0.849709	0.644747	0.695293	0.743927	0.747265	0.821146	0.838997	0.865652	0.862483	22570	11157	27324	13022	32037	11598	34192	13141	11655	6486	7467	5282	5943	3461	5163
P2C08	P2	C08	22462	6067	29943	30408	31072	33244	33062	34521	11872	2838	9483	9345	7003	6517	5269	5244	0.65422	0.681303	0.759473	0.764923	0.816074	0.836096	0.862539	0.868125	0.659113	0.691749	0.764507	0.773964	0.823291	0.881373	0.87028	0.881176	25715	10731	25999	13295	31583	10999	33666	14398	13007	6307	7780	5493	6936	3288	5773
P2C09	P2	C09	21991	3673	31211	29298	31450	31691	31584	33979	12179	1698	8149	10477	5630	8074	4701	5780	0.643576	0.683858	0.792962	0.736593	0.848166	0.796957	0.870442	0.854624	0.648389	0.694343	0.798217	0.745299	0.855667	0.840115	0.878254	0.867472	23853	10205	25943	14170	30506	10912	33915	14124	11829	6118	7406	5461	6625	3173	5555
P2C10	P2	C10	20848	5317	29853	30631	30121	32553	31444	34486	11451	2434	9663	9108	6679	7239	5654	5327	0.645469	0.685976	0.755466	0.770804	0.818505	0.818079	0.847593	0.866199	0.650296	0.696494	0.760473	0.779914	0.825744	0.862381	0.8552	0.879222	24502	10291	25953	14392	31973	11623	33630	14509	12626	6484	8358	5170	7527	3030	5716
P2C11	P2	C11	20347	4147	26941	23457	28244	24837	29645	26405	17465	3589	11353	15869	10323	14628	9101	13119	0.53811	0.536065	0.703531	0.596476	0.732336	0.629342	0.765111	0.668075	0.542134	0.544284	0.708193	0.603525	0.738813	0.663423	0.771978	0.678119	16054	9927	22304	11748	22866	11285	24233	12516	21046	11845	15543	9527	15122	8484	13957
P2C12	P2	C12	21055	6545	27434	31031	30019	33729	33280	34700	11362	3164	10873	8737	8001	6060	6156	5094	0.649505	0.674117	0.716162	0.780301	0.789558	0.847697	0.843899	0.871991	0.654362	0.684453	0.720908	0.789523	0.796541	0.893602	0.851473	0.8851	22247	10502	27437	13447	32996	13543	34254	16529	12955	6340	6615	4656	6354	3428	5052
P2D01	P2	D01	21256	5643	31757	30850	35383	34782	37535	37410	17109	4473	7213	8899	3745	4981	2040	2325	0.554047	0.557829	0.814909	0.77612	0.904288	0.874733	0.948452	0.941487	0.55819	0.566382	0.820309	0.785293	0.912286	0.922103	0.956964	0.955641	14402	9564	7823	6689	3616	3023	1840	1615	23463	21527	28496	27352	32516	26245	34134
P2D02	P2	D02	21718	5903	33042	32488	36459	35359	38287	37769	15100	4595	5903	7213	2814	4412	1271	2034	0.589875	0.562298	0.848427	0.818317	0.928348	0.889065	0.96787	0.948898	0.594286	0.570919	0.85405	0.827988	0.936558	0.937211	0.976556	0.963164	19634	10209	27089	14294	31759	15266	34338	19074	18882	10878	11623	6081	7304	3674	4801
P2D03	P2	D03	20105	5427	32784	30300	36378	34342	38050	37622	14839	3955	6142	9416	3002	5409	1438	2081	0.575349	0.578448	0.842213	0.762917	0.923768	0.863928	0.963584	0.947586	0.579652	0.587317	0.847795	0.771933	0.931938	0.910713	0.972232	0.961831	21244	10776	24599	14213	26665	11386	28653	16629	17181	10924	13719	7830	12086	4726	10124
P2D04	P2	D04	19282	4540	22733	22163	21508	20933	20914	20256	20141	4464	16614	17622	17998	18841	18621	19563	0.489105	0.50422	0.577757	0.557069	0.544424	0.526299	0.529	0.508702	0.492763	0.511951	0.581586	0.563653	0.549239	0.554799	0.533747	0.516349	19704	10104	19488	10394	18276	7834	18158	9028	19685	12290	19978	12456	21061	10406	21157
P2D05	P2	D05	18837	5408	31021	32053	35285	34897	37528	37764	14346	4348	7747	7643	4009	4861	1883	2034	0.56767	0.554326	0.80017	0.807462	0.897974	0.877735	0.952221	0.948892	0.571916	0.562825	0.805473	0.817005	0.905916	0.925268	0.960767	0.963157	19905	10678	23897	13030	26147	12228	29161	13778	17976	12287	13684	9138	12029	7001	9271
P2D06	P2	D06	19759	5418	31550	31682	35146	34550	37322	37682	15304	4037	7221	8021	4192	5200	2135	2008	0.563529	0.57303	0.813753	0.797975	0.893436	0.869182	0.94589	0.949408	0.567743	0.581816	0.819145	0.807406	0.901338	0.916252	0.954379	0.963681	20507	10521	27040	13450	29879	10980	32354	15254	17997	11613	11464	8855	8957	5186	6565
P2D07	P2	D07	20679	5649	31948	32081	32985	33528	33822	35611	11399	2773	6468	7680	4518	6230	3413	4161	0.644647	0.670743	0.831633	0.806846	0.87953	0.843302	0.908339	0.895379	0.649469	0.681028	0.837144	0.816382	0.887308	0.88897	0.916491	0.908839	23637	10619	30029	14972	35312	12807	36058	16472	12030	6306	5801	3986	4183	2579	3444
P2D08	P2	D08	19993	5230	31487	29912	31947	31615	33344	33062	11394	2361	7942	9862	5505	8145	4312	6687	0.636983	0.688974	0.798575	0.752049	0.853012	0.795146	0.88549	0.831769	0.641747	0.699538	0.803867	0.760937	0.860556	0.838206	0.893437	0.844274	21432	10383	25441	13432	29535	10736	33137	12460	12733	6235	8688	5898	7775	3662	6311
P2D09	P2	D09	21748	4727	30966	30489	31285	33299	33543	35345	11975	2291	8428	7585	5035	6486	3623	4441	0.644901	0.673554	0.786059	0.800783	0.861371	0.836974	0.902518	0.888378	0.649724	0.683881	0.791268	0.810247	0.868989	0.882299	0.910618	0.901733	20950	11178	28528	12456	30678	11269	33146	14684	11840	6420	8725	5417	6920	3657	6376
P2D10	P2	D10	21059	6023	30788	29140	32499	32102	33979	34142	11501	2874	8608	10618	6266	7660	4418	5659	0.646775	0.67697	0.781501	0.732934	0.838359	0.807354	0.884939	0.857818	0.651612	0.68735	0.78668	0.741597	0.845774	0.851075	0.892881	0.870714	23503	11182	30403	13154	33310	11340	34484	14325	12152	6556	8837	5637	6185	3543	4942
P2D11	P2	D11	20896	6089	29623	27974	33176	31441	31487	34752	15830	4356	9085	11705	5939	8267	3319	5021	0.56897	0.582958	0.765294	0.705008	0.848166	0.791805	0.904643	0.873759	0.573225	0.591897	0.770366	0.71334	0.855667	0.834684	0.912762	0.886894	20102	10934	24172	13571	25275	12346	26272	14477	18424	11766	14358	7131	13282	5947	12422
P2D12	P2	D12	20049	6175	25746	31522	29665	33377	33164	35454	11404	2897	8998	8260	7054	6372	6294	4327	0.637427	0.680666	0.74102	0.792368	0.807892	0.839694	0.840489	0.891229	0.642195	0.691102	0.745931	0.801733	0.815037	0.885166	0.848032	0.904628	21400	11293	25874	13944	30980	12445	32822	15979	12829	7354	9505	5278	8464	3387	6601
P2E01	P2	E01	21221	5407	32160	31465	36145	35173	37817	37755	17173	4485	6860	8243	3094	4595	1686	2040	0.552717	0.546603	0.824193	0.79241	0.92115	0.884455	0.95732	0.948737	0.55685	0.554984	0.829655	0.801775	0.929297	0.932351	0.965911	0.963	19506	10453	27426	14585	30280	14833	32226	19899	19131	12778	11474	8114	8797	5652	6925
P2E02	P2	E02	21865	5519	32102	31050	35489	34861	37412	37676	16394	4009	6797	8623	3816	4933	2080	2117	0.5715	0.57924	0.825265	0.782648	0.902913	0.876037	0.947331	0.9468	0.575774	0.588121	0.830735	0.791898	0.910899	0.923477	0.955833	0.961033	19987	10302	22239	13264	22452	11530	24163	15411	17925	11601	15755	9711	15600	7528	14076
P2E03	P2	E03	21403	5482	32102	32259	36145	34951	37858	38144	16549	4118	6753	7423	3165	4773	1628	1650	0.563949	0.571042	0.8262	0.812938	0.919486	0.879846	0.95877	0.958536	0.568167	0.579797	0.831675	0.822546	0.927618	0.927493	0.967375	0.972947	20169	8865	26011	13337	29527	14384	32762	17989	18433	9587	12604	7377	9337	5087	6360
P2E04	P2	E04	21209	5267	33171	31725	36544	35112	38003	38080	15878	4114	5777	7990	2792	4650	1519	1713	0.571872	0.561454	0.851674	0.798817	0.929022	0.883054	0.961566	0.956952	0.576148	0.570063	0.857318	0.808258	0.937238	0.930875	0.970195	0.971339	20283	10254	26696	13846	29364	14103	32390	18027	18133	11804	11856	9294	9593	5878	6726
P2E05	P2	E05	21055	4571	31885	31615	36219	34914	37701	37589	15884	3447	7035	8091	3093	4848	1753	2139	0.569994	0.570092	0.819245	0.796227	0.921322	0.878075	0.955569	0.946159	0.574257	0.578833	0.824674	0.805638	0.92947	0.925625	0.964144	0.960383	21024	10953	28298	14702	30766	13988	32935	16186	17792	11400	10324	7278	8227	5152	6243
P2E06	P2	E06	20877	5411	30130	29018	33919	32635	36545	36426	17509	4184	8555	10652	4713	7047	2844	3350	0.54387	0.56394	0.778855	0.731485	0.878003	0.822413	0.927797	0.915778	0.547938	0.572586	0.784016	0.74013	0.885768	0.86695	0.936124	0.929546	20746	9867	25819	12599	27261	12014	28775	13949	17426	11116	12429	9664	11207	8029	9896
P2E07	P2	E07	21811	5744	29859	27182	29772	32119	31446	34352	11470	2600	9528	7411	6728	7670	5404	5431	0.655359	0.688399	0.758093	0.785766	0.815671	0.807233	0.853351	0.863484	0.66026	0.698954	0.763117	0.795053	0.822885	0.850948	0.86101	0.876466	23444	10576	26713	12916	31596	11585	32995	14550	11573	6526	8848	6457	7388	4417	6447
P2E08	P2	E08	20940	4409	30945	30627	32015	32480	35117	34665	11649	2223	8450	9127	5842	7270	4485	5144	0.642548	0.664807	0.785506	0.770413	0.845682	0.817107	0.886748	0.870783	0.647354	0.675	0.790711	0.779518	0.853162	0.861356	0.894706	0.883874	23045	11396	29987	14733	31193	12056	33663	16776	11038	6216	8779	6105	6562	3422	5747
P2E09	P2	E09	22226	5644	31184	29901	27714	32028	32125	33928	11875	2570	8194	9870	4674	7727	3736	5794	0.65177	0.68712	0.791914	0.751829	0.855687	0.805635	0.89582	0.854136	0.656644	0.697655	0.797162	0.760715	0.863255	0.849262	0.90386	0.866977	21605	10722	30232	15679	31882	12904	33270	15250	11071	6355	9055	5456	7171	3470	6181
P2E10	P2	E10	21295	5781	30836	30354	30809	32638	32449	33442	11629	2577	8577	9427	5713	7125	4019	6365	0.646793	0.691673	0.782381	0.763028	0.843574	0.820813	0.889794	0.840103	0.65163	0.702278	0.787566	0.772046	0.851034	0.865263	0.897779	0.852733	23318	10873	26340	15524	30745	12686	33426	16068	10959	5978	7573	5158	6862	3254	6066
P2E11	P2	E11	21770	5262	29075	28237	32609	31444	30852	33919	16498	3588	9774	11420	6505	8272	3837	5858	0.568883	0.594576	0.748411	0.712031	0.833691	0.791721	0.889389	0.852729	0.573137	0.603693	0.75337	0.720446	0.841065	0.834596	0.89737	0.865548	21620	11445	25745	14229	30749	13596	33225	17416	16964	10486	10495	7377	8241	5094	5880
P2E12	P2	E12	22002	5872	31007	31595	32198	33727	34898	35606	12164	2737	8309	8191	5612	6055	4616	4195	0.643974	0.682077	0.788661	0.794124	0.851574	0.847795	0.883181	0.894601	0.64879	0.692535	0.793888	0.803509	0.859105	0.893706	0.891107	0.90805	22578	11568	26850	14146	32841	13636	34041	16886	12534	6759	7235	6037	6586	4396	5325
P2F01	P2	F01	20866	5798	31649	31489	35744	35385	37597	37975	17282	4545	7289	8241	3482	4382	1877	1818	0.546975	0.560572	0.812805	0.792575	0.911232	0.889808	0.95245	0.954314	0.551066	0.569167	0.818192	0.801942	0.919291	0.937994	0.960997	0.96866	19408	11077	25026	17113	28569	16828	31466	22291	19075	13267	13663	8047	10234	4918	7436
P2F02	P2	F02	21163	5016	31509	31585	35654	34641	37565	37615	17061	4010	7306	8096	3673	5107	1955	2183	0.553657	0.555728	0.811774	0.795973	0.906604	0.871516	0.950531	0.945148	0.557798	0.564249	0.817154	0.80538	0.914622	0.918711	0.959062	0.959357	20338	12035	28220	15534	30868	15070	34042	19349	18184	12921	10590	8518	8048	5550	4992
P2F03	P2	F03	20199	5568	29840	29700	33783	32335	35724	35773	18400	4666	8845	9907	5366	7379	3606	3971	0.523304	0.544069	0.771358	0.749867	0.862934	0.814197	0.908314	0.900086	0.527217	0.552411	0.77647	0.75873	0.870566	0.858288	0.916466	0.913617	20934	11397	24118	14465	26960	14922	29302	18336	17748	11779	14728	8594	11935	5966	9674
P2F04	P2	F04	21022	5210	30775	31884	35275	34262	37276	36802	16879	3919	8068	7813	4007	5494	2225	2962	0.554656	0.570709	0.792292	0.803184	0.897994	0.861807	0.943672	0.925511	0.558804	0.579459	0.797543	0.812677	0.905936	0.908477	0.952141	0.939424	19799	10995	24320	14847	26156	13364	28802	17201	18683	13396	14000	10585	12481	7549	9875
P2F05	P2	F05	21322	5238	30610	31395	34993	34745	37232	37786	16849	4007	8101	8290	4318	5030	2199	2000	0.558592	0.566577	0.790731	0.791105	0.890158	0.873539	0.944232	0.949731	0.562769	0.575264	0.795972	0.800455	0.898031	0.920844	0.952706	0.964009	20054	11461	26384	16067	29313	14208	31553	17631	18156	13316	11880	9200	9441	6249	7378
P2F06	P2	F06	23884	3869	32410	31200	32243	33050	34880	35024	11864	1956	7044	8592	4851	6715	4421	4777	0.668121	0.664206	0.821463	0.784077	0.869224	0.831133	0.887509	0.879978	0.673118	0.67439	0.826907	0.793344	0.876912	0.876142	0.895474	0.893207	23776	10658	28671	15072	31932	12561	34273	17108	11542	5967	7620	5970	6684	3264	5149
P2F07	P2	F07	21952	4825	31237	31130	31629	32856	32948	34816	11996	2269	8160	8643	5340	6924	4459	4992	0.646636	0.680152	0.792878	0.782692	0.855555	0.825943	0.880798	0.874598	0.651472	0.690581	0.798132	0.791942	0.863121	0.87067	0.888702	0.887746	23762	10763	26197	15218	32593	14147	34108	17199	11193	6007	7795	5892	6169	3432	5365
P2F08	P2	F08	21804	5876	30032	31142	29249	32863	30853	34371	12098	2783	9438	8603	7194	6931	5879	5375	0.643148	0.6786	0.760882	0.783545	0.802596	0.825828	0.839949	0.864766	0.647958	0.689005	0.765924	0.792806	0.809694	0.870549	0.847487	0.877767	23564	11872	25396	15637	30350	12726	34039	15840	11736	6571	8372	6318	6564	3558	5402
P2F09	P2	F09	21546	4166	29613	30189	30662	32283	31442	33935	12079	1992	9732	9299	5833	7477	4922	5869	0.640773	0.676518	0.75265	0.764511	0.84017	0.811947	0.864646	0.852553	0.645565	0.686891	0.757638	0.773546	0.8476	0.855916	0.872406	0.865369	23276	11344	27138	14679	31578	12590	34157	16091	11686	6668	8348	6220	6792	3923	5266
P2F10	P2	F10	21603	5962	30512	31019	32516	32802	33456	34595	12727	2718	9006	8762	6302	6964	4513	5210	0.629275	0.686866	0.772104	0.779744	0.837653	0.824876	0.88114	0.869112	0.633981	0.697398	0.777221	0.78896	0.845061	0.869545	0.889048	0.882178	23270	11196	26544	15504	30558	14100	32929	17052	12128	6793	8853	5654	7938	3892	6397
P2F11	P2	F11	21223	5480	29285	28196	32815	31910	35107	34662	16266	3831	9552	11514	6345	7835	3882	5132	0.566113	0.588551	0.754049	0.710048	0.837972	0.802868	0.900433	0.871036	0.570347	0.597575	0.759046	0.71844	0.845384	0.846346	0.908514	0.884131	13427	11688	24091	11851	24039	11898	24650	13133	23683	13693	14171	11090	14276	10102	13512
P2F12	P2	F12	21758	5729	30209	31717	32415	34044	33935	34847	12426	2682	9084	8025	6982	5711	5544	4947	0.636497	0.681132	0.768814	0.798073	0.822778	0.856345	0.859571	0.875685	0.641257	0.691575	0.773909	0.807505	0.830055	0.902719	0.867285	0.888849	24728	12310	25087	17893	28528	12713	30523	18037	13191	7409	9357	6220	9104	3408	8658
P2G01	P2	G01	20646	5091	28463	28876	33943	33925	36651	36894	17718	4382	10148	10735	5088	5866	2742	2901	0.538161	0.537422	0.737173	0.728989	0.869642	0.85258	0.930394	0.927101	0.542186	0.545662	0.742059	0.737605	0.877333	0.89875	0.938744	0.941039	16706	10797	22836	15665	25315	15285	28254	21345	19787	17258	14133	12340	12544	9008	9037
P2G02	P2	G02	21053	5328	31381	31379	35558	35160	37413	37921	16892	4196	7686	8301	3750	4606	2037	1896	0.554829	0.559429	0.803261	0.790801	0.9046	0.884172	0.948365	0.952382	0.558979	0.568006	0.808584	0.800148	0.9126	0.932053	0.956876	0.9667	19604	12043	24451	17983	27934	17184	30870	24328	18698	14624	13819	7717	10915	5031	7781
P2G03	P2	G03	20252	5044	28213	30952	33396	33820	36140	36347	17785	3899	10548	8768	5773	5959	3393	2888	0.532429	0.564017	0.727871	0.779255	0.852613	0.850197	0.914173	0.926392	0.536411	0.572664	0.732694	0.788465	0.860154	0.896238	0.922377	0.940319	20480	11290	24960	13454	27710	13752	29828	18767	17680	12959	13488	9056	10883	6578	8683
P2G04	P2	G04	20222	3891	30111	31995	34785	34785	37088	37490	17663	2727	8750	7745	4464	4982	2429	2184	0.533773	0.587942	0.774839	0.805108	0.886265	0.87472	0.938533	0.944951	0.537765	0.596957	0.779973	0.814624	0.894103	0.922089	0.946956	0.959157	20369	11202	25550	16120	28062	12615	30568	20053	17988	12634	12872	9917	10473	5045	7864
P2G05	P2	G05	20338	6336	29687	29862	33593	32847	35755	36426	18049	4816	9263	9818	5509	6892	3612	3349	0.529815	0.568149	0.762182	0.752571	0.859112	0.826568	0.908248	0.915801	0.533777	0.57686	0.767233	0.761465	0.86671	0.87133	0.916399	0.929569	20392	10311	26270	15864	29135	13790	31602	19347	18101	11868	12117	10128	9658	6088	7130
P2G06	P2	G06	19565	5187	29096	29315	33096	32710	35172	35818	18448	4246	9729	10354	6016	7009	4148	3818	0.514692	0.549878	0.749414	0.73899	0.846185	0.823535	0.894507	0.903673	0.518542	0.558309	0.75438	0.747724	0.853669	0.868133	0.902534	0.917259	18483	10793	23998	15331	26393	13744	28924	18688	19520	13426	14052	10340	12068	6966	9405
P2G07	P2	G07	18917	5459	28134	30606	29375	32525	30198	35067	11317	2564	10427	9169	7900	7236	5708	4721	0.625686	0.680419	0.729597	0.769478	0.788062	0.818013	0.841029	0.881346	0.630366	0.690851	0.734432	0.778573	0.795031	0.862311	0.848577	0.894596	22495	11360	23808	15132	31670	12386	33298	17727	11655	6523	7135	6709	7817	3890	6046
P2G08	P2	G08	20703	5992	27991	30153	26866	32588	29974	34402	12009	2885	11370	9622	7213	7202	6278	5418	0.632887	0.675003	0.711135	0.758089	0.788345	0.819	0.826823	0.863938	0.63762	0.685352	0.715848	0.767049	0.795317	0.863351	0.834244	0.876926	25033	11983	25953	14475	31900	12622	33572	17513	12038	6821	8497	6136	7302	4060	5767
P2G09	P2	G09	20511	5663	28846	31343	29634	33804	29398	35569	11981	2652	10494	8453	6695	5986	5101	4227	0.631263	0.681058	0.733249	0.787592	0.815712	0.84956	0.852141	0.893783	0.635984	0.691501	0.738108	0.7969	0.822926	0.895567	0.859788	0.90722	23955	11709	23384	15303	31747	13801	33363	17931	11913	6743	7575	5831	7648	3393	5946
P2G10	P2	G10	20036	5678	27044	31676	31444	33189	26942	34875	12823	2629	10127	8121	7834	6603	4728	4850	0.609757	0.68352	0.727556	0.795939	0.80055	0.834062	0.85071	0.877911	0.614317	0.694	0.732378	0.805346	0.80763	0.879229	0.858345	0.891109	24302	11114	25777	14054	31819	14044	33415	17105	12532	7052	6817	6764	6671	4294	5659
P2G11	P2	G11	20853	5094	27573	27176	31543	31495	33501	34461	17156	3691	11381	12575	7424	8228	5371	5304	0.548633	0.579852	0.707835	0.683656	0.80948	0.792866	0.861829	0.866616	0.552736	0.588743	0.712526	0.691736	0.816639	0.835802	0.869563	0.879645	20268	11919	22203	15426	23500	12575	25222	15088	18338	13339	16251	10712	14867	7693	12688
P2G12	P2	G12	21373	5343	26558	30375	30544	33332	32766	35401	16899	4088	11801	9394	8208	6387	6259	4392	0.55845	0.566536	0.692354	0.763786	0.788192	0.839195	0.839616	0.889629	0.562627	0.575222	0.696942	0.772813	0.795162	0.884641	0.847151	0.903003	18381	10730	21924	17329	23886	15214	24963	17280	19598	11774	16114	9858	14335	7067	12902
P2H01	P2	H01	18668	5945	27207	31190	33069	35402	36438	37793	19390	5015	11459	8581	5833	4359	3059	2004	0.490514	0.542427	0.703641	0.78424	0.850059	0.89037	0.922551	0.949644	0.494183	0.550744	0.708305	0.793508	0.857577	0.938587	0.930831	0.963921	19462	11493	26325	16113	29937	16389	32066	27492	18613	14255	12020	8095	9083	5930	6642
P2H02	P2	H02	18549	4755	26440	29848	31853	34541	35285	37505	19533	4209	12207	9886	7019	5241	4067	2338	0.487081	0.530455	0.684141	0.751195	0.819433	0.868257	0.896651	0.94132	0.490723	0.538588	0.688675	0.760074	0.82668	0.915276	0.904698	0.955471	20725	11548	26440	15455	29486	15698	30590	25643	16909	12143	11767	8228	9216	5769	7656
P2H03	P2	H03	16782	5080	26219	33202	32409	35508	36117	38264	21218	3863	12588	6597	6661	4258	3175	1537	0.441632	0.568042	0.675626	0.834242	0.829511	0.892924	0.919195	0.961383	0.444934	0.576752	0.680103	0.844102	0.836847	0.941278	0.927444	0.975836	20793	11289	26004	15564	29347	14104	32080	26963	17966	12807	12583	8187	9764	4691	6612
P2H04	P2	H04	19537	4993	25936	32756	33175	35966	36719	38453	19709	2784	13336	7030	6193	3804	2683	1340	0.497809	0.642021	0.66042	0.823305	0.842689	0.90435	0.931907	0.966326	0.501532	0.651865	0.664796	0.833035	0.850142	0.953324	0.94027	0.980853	24123	11229	27811	14820	31596	14930	33800	25142	15388	8875	11500	6403	7779	3991	5275
P2H05	P2	H05	17467	4980	27093	30831	32924	34596	36293	37771	20497	3873	11756	8920	6124	5197	3051	2031	0.460094	0.562521	0.697392	0.775603	0.843167	0.869399	0.922453	0.948972	0.463535	0.571146	0.702014	0.78477	0.850624	0.91648	0.930732	0.963239	20630	10993	27220	14649	30780	13866	33290	23486	17926	12025	11147	9471	8052	5940	5311
P2H06	P2	H06	17990	4801	24965	29909	31620	34032	35251	37133	20041	3675	13762	9844	7699	5723	4117	2660	0.473035	0.566423	0.644641	0.752371	0.804191	0.856043	0.895423	0.933154	0.476573	0.575108	0.648913	0.761263	0.811304	0.902401	0.903459	0.947183	20313	10692	25862	14722	28439	14434	31130	17517	18684	11619	12926	7538	10661	5255	7802
P2H07	P2	H07	22307	4916	25842	31546	29232	33341	31430	35109	16534	2386	13612	8251	10164	6451	8156	4700	0.574316	0.67324	0.654991	0.792673	0.742004	0.837882	0.793968	0.881936	0.578611	0.683563	0.659331	0.802041	0.748567	0.883256	0.801093	0.895195	26761	10681	27362	14191	32266	11539	33443	18759	12893	5778	8371	6158	7211	3335	5903
P2H08	P2	H08	21714	4882	25392	30112	29884	32448	30219	33610	16017	2300	12764	9701	9347	7320	6891	6218	0.575495	0.679755	0.665479	0.756336	0.761745	0.815932	0.814309	0.843879	0.579799	0.690177	0.669889	0.765275	0.768482	0.860118	0.821617	0.856565	25436	11459	27820	14740	33726	12493	34590	18272	12330	6395	6571	6044	5793	3166	4674
P2H09	P2	H09	22011	4937	29735	31369	32358	33591	34202	35399	15224	2215	9693	8435	7077	6196	5418	4395	0.591137	0.690296	0.754159	0.788087	0.82054	0.844271	0.863251	0.889556	0.595558	0.70088	0.759157	0.797401	0.827797	0.889991	0.870998	0.902929	24363	11273	27680	15593	32767	14312	34168	19104	11611	6599	7945	5924	6777	3528	5004
P2H10	P2	H10	21062	4818	29668	32980	32696	35021	32420	36656	13865	2086	9750	6822	6790	4766	5383	3162	0.603029	0.697856	0.752651	0.828602	0.82804	0.880212	0.857604	0.920589	0.607539	0.708556	0.757639	0.838395	0.835364	0.927879	0.8653	0.934428	24297	10924	30815	19039	34832	16227	35466	20360	11755	6670	5590	4540	4698	2421	3908
P2H11	P2	H11	19102	4801	26858	27423	31201	31644	32988	34221	18973	3462	11965	12332	7872	8079	6175	5591	0.501694	0.581024	0.691806	0.6898	0.798531	0.796617	0.842326	0.859565	0.505446	0.589932	0.696391	0.697953	0.805593	0.839756	0.849885	0.872487	23183	10973	28816	14890	31564	13558	33739	19166	15521	10107	10055	9168	7513	5044	5117
P2H12	P2	H12	22038	5351	28219	31420	30799	33774	32599	35059	14875	2426	11219	8371	8654	6015	6911	4770	0.597025	0.688055	0.715528	0.789626	0.78065	0.848828	0.825082	0.880238	0.601491	0.698604	0.72027	0.798958	0.787555	0.894794	0.832487	0.893471	24823	11763	29893	16610	34157	14968	34640	18882	13392	6951	6595	6451	5253	3931	4588
P3A01	P3	A01	6476	4006	79	24399	31642	31283	30789	32129	12577	4955	16	13731	5706	7136	3267	6336	0.339894	0.447048		0.63989	0.847221	0.814259	0.90407	0.835279	0.386723	0.538343		0.727345	0.928131	0.950296	0.97641	0.951622	14436	5178	22078	8710	25597	8996	29305	13027	20769	11719	16266	13386	12747	10079	8388
P3A02	P3	A02	6506	4071	33	27385	112	31975	2	31785	11568	4555	15	10776	28	6465	2	6743	0.359965	0.471945		0.717617		0.831816		0.824984	0.409559	0.568324		0.815696		0.970786		0.939894	13096	4684	24045	9758	27116	9121	28812	13769	16969	8806	14062	10410	11078	5884	6390
P3A03	P3	A03	14	40	8	38	43	22	1	20	31	79	29	60	82	28	0	27																	2	21	0	63	4	102	45	49	16	42	25	92	36	86	7
P3A04	P3	A04	6939	3424	1	22415	13	32667	1	30505	10367	3686	5	6848	8	5870	1	8059	0.400959	0.481575		0.765984		0.847679		0.791023	0.456202	0.579921		0.870674		0.989299		0.901202	13015	4197	22063	10375	25834	9010	26221	14125	23387	8670	16179	10841	12369	5209	5593
P3A05	P3	A05	0	3466	3	17814	198	30136	287	29142	7794	2764	48	9856	14485	8430	14598	8764	0	0.55634		0.643802	0.013485	0.781414	0.0192812	0.768796	0.01	0.669954		0.731792	0.0147728	0.911963	0.020824	0.87588	12310	3835	26659	9584	27410	7155	23683	11203	9000	3670	11379	5978	9481	3674	5656
P3A06	P3	A06	2	3381	1	21298	2	30073	1	29396	7285	2688	76	10410	15047	8599	14766	9150	0.000274461	0.557093		0.671692	0.000132899	0.777643	6.77186e-05	0.762621	0.01	0.670861		0.763494	0.01	0.907562	0.01	0.868844	11836	4182	27087	10104	28126	7887	26377	11394	8727	4035	10405	5792	7930	3493	4027
P3A07	P3	A07	6298	3301	27709	20873	27894	30348	25930	26648	7675	2765	8257	10028	4106	8252	2805	11575	0.450726	0.544181	0.770422	0.67548	0.871687	0.786218	0.902384	0.697172	0.512826	0.655311	0.824326	0.7678	0.954935	0.91757	0.97459	0.794279	11299	4235	24236	8677	21460	5782	22422	8652	9460	4724	13191	7619	9889	4751	6754
P3A08	P3	A08	0	3347	4	21027	11	30261	3	29756	7121	2746	14457	9335	16387	8388	15087	8837	0	0.549319	0.000276606	0.692543	0.000670814	0.78297	0.000198807	0.771021	0.01	0.661499	0.01	0.787195	0.01	0.913779	0.01	0.878414	11143	4132	27525	10169	24254	8624	27022	12425	7912	3427	9480	5225	6165	3035	3334
P3A09	P3	A09	9625	3532	26871	19743	32672	30664	27511	28827	7810	2949	8789	11121	5471	8014	3262	9751	0.55205	0.544978	0.753533	0.639677	0.856566	0.792802	0.893998	0.747239	0.62811	0.656271	0.806255	0.727104	0.938369	0.925254	0.965533	0.85132	10349	4350	24083	9439	18650	6741	22088	10364	8802	4805	14026	7378	8582	4431	8168
P3A10	P3	A10	1	3586	2	16934	8	31771	4	30956	6478	2729	17689	6422	12	6993	1	7639	0.000154345	0.567854	0.000113052	0.725039		0.819601		0.802073	0.01	0.683819	0.01	0.824132		0.95653		0.913791	12189	4753	29296	10757	23911	8727	31737	9383	7691	3729	8432	5896	4976	4219	4083
P3A11	P3	A11	0	4050	47	25038	3	31725	1	25171	13804	5350	37702	10710	26	7033	13	13479	0	0.430851	0.00124507	0.700403		0.818541		0.651255	0.01	0.518838	0.01	0.796129		0.955293		0.741966	10850	6345	23606	14154	21495	11094	31421	15049	17164	7435	14796	6813	8330	3167	6390
P3A12	P3	A12	12845	28	1	63	1	40	0	47	8830	2903	9	25338	6	13	2	29	0.592618	0.00955305		0.00248022					0.674267	0.0115039		0.01					14028	4512	31526	19417	26360	11407	34085	15503	8505	4930	6403	5946	4976	2927	3807
P3B01	P3	B01	8374	3863	25110	27863	27227	32807	28207	34035	10522	4042	8756	10423	3468	5682	2533	4714	0.443163	0.488678	0.741452	0.727759	0.887017	0.852373	0.917599	0.878345	0.50422	0.588474	0.793328	0.827225	0.971728	0.99	0.99	0.99	10669	4535	22620	8778	23002	7804	28338	10745	15245	8119	15387	9904	11993	7872	9477
P3B02	P3	B02	8130	3301	19836	24171	24514	32356	25743	33548	10254	4130	9170	9670	4407	6102	2893	5072	0.442232	0.44422	0.683859	0.714252	0.847619	0.841333	0.898973	0.868669	0.503162	0.534937	0.731706	0.811871	0.928568	0.981894	0.970906	0.989663	10946	4118	24283	8002	22552	6915	26659	11219	15010	7869	14158	9672	10031	6699	6500
P3B03	P3	B03	8354	3300	18733	25868	25123	32974	26307	34319	9924	3248	7762	8356	3493	5678	2299	4381	0.457052	0.503971	0.707039	0.755844	0.877935	0.853099	0.919632	0.886796	0.520023	0.60689	0.756508	0.859147	0.961779	0.99	0.99	0.99	10293	4123	23121	9076	24095	7419	31239	11709	18838	9396	14962	10555	8762	5390	4319
P3B04	P3	B04	8005	3423	21268	26389	27006	33691	26390	34467	8782	3063	6825	8246	2794	4875	2173	4158	0.476857	0.527752	0.757057	0.761917	0.906242	0.873593	0.923923	0.89235	0.542557	0.635527	0.810025	0.866051	0.99	0.99	0.99	0.99	10518	4062	21527	9174	20150	7632	24464	10416	14540	6957	14921	7747	9380	4779	6249
P3B05	P3	B05	8706	3133	19167	28166	26462	33925	24672	34241	9476	3300	7181	7561	3295	4791	2399	4440	0.478825	0.48702	0.727456	0.788367	0.88927	0.876253	0.911381	0.885215	0.544796	0.586477	0.778353	0.896116	0.974196	0.99	0.984307	0.99	10101	2488	22914	8751	22019	6530	26315	10703	17383	5941	14994	10857	9528	5983	5335
P3B06	P3	B06	8395	3388	16835	21549	24285	33210	24834	33845	10122	3752	8146	7222	4899	5507	2900	4793	0.453367	0.47451	0.673912	0.748983	0.832134	0.857763	0.895435	0.875951	0.51583	0.571412	0.721063	0.851349	0.911604	0.99	0.967085	0.99	10587	3928	23250	9275	22270	7047	28080	12154	15845	7626	11966	9619	6737	4501	3636
P3B07	P3	B07	7792	3091	16237	20856	20591	28973	21633	29861	7042	2386	6659	8503	5363	7533	4158	7936	0.52528	0.56436	0.709163	0.710378	0.793365	0.79365	0.838781	0.790036	0.597651	0.679611	0.758781	0.807468	0.869132	0.926244	0.905897	0.900078	10092	3891	21614	10182	20751	6854	24752	9923	6837	3752	7570	5302	5944	3205	4661
P3B08	P3	B08	7977	3177	15625	21034	19987	29319	20296	29285	6745	2407	6927	10297	6173	6816	4557	7281	0.541842	0.568947	0.692843	0.671348	0.764029	0.811374	0.816642	0.800881	0.616495	0.685135	0.741319	0.763103	0.836995	0.946929	0.881987	0.912433	10593	3939	22791	10450	18793	7670	26360	11741	7303	3307	7403	4874	4512	2613	3241
P3B09	P3	B09	8395	3024	15087	19895	23627	30621	20719	29115	6932	2380	6820	8912	6272	7520	3514	6811	0.547726	0.559585	0.688684	0.690631	0.790227	0.802837	0.854991	0.810416	0.62319	0.673862	0.736869	0.785021	0.865695	0.936966	0.923405	0.923296	10375	4297	22635	10267	20755	7704	25873	11823	8219	4061	7869	5499	5258	2901	3863
P3B10	P3	B10	8141	3075	14556	18811	24958	29870	22702	29551	6825	2419	6738	8022	6677	7354	3637	7542	0.543966	0.559701	0.683573	0.70104	0.788936	0.802439	0.861916	0.796673	0.618912	0.674001	0.7314	0.796853	0.864281	0.936502	0.930883	0.907639	10057	4767	22687	9830	20130	7843	26469	11791	7296	3675	7846	4531	5315	2543	4236
P3B11	P3	B11	8630	3233	18323	25396	32030	31970	25682	31158	11861	4375	10100	9192	6297	6685	2955	7603	0.421161	0.424947	0.644654	0.734243	0.835703	0.82706	0.896812	0.803849	0.479186	0.511728	0.689758	0.834594	0.915514	0.965236	0.968572	0.915815	9589	4798	24075	10828	21803	8900	27699	13505	14804	7519	14115	6819	8050	3467	5870
P3B12	P3	B12	9869	3431	18855	23072	31417	31678	24550	31182	7311	2574	8072	9678	6952	7013	3520	7421	0.574447	0.571357	0.700227	0.704489	0.818812	0.818743	0.874599	0.807761	0.653592	0.688037	0.749219	0.800773	0.897009	0.95553	0.944582	0.920271	10980	6345	27055	14101	21522	9568	32183	14310	8962	4301	10833	5802	6226	2655	5627
P3C01	P3	C01	7931	3266	18214	20927	14197	19792	10819	16436	14051	4707	19137	17779	20671	17397	22488	22733	0.360795	0.409633	0.487644	0.540666	0.407164	0.5322	0.324827	0.419618	0.410504	0.493286	0.521763	0.61456	0.446049	0.621114	0.350818	0.478065	9881	4443	9278	5030	5322	2282	3717	1943	25920	13596	28403	20258	32742	17184	34130
P3C02	P3	C02	7799	3268	20629	26923	26662	33644	25725	34690	8869	3298	6058	7584	2930	5057	2332	3997	0.467903	0.497716	0.772998	0.780219	0.900987	0.869332	0.916883	0.896684	0.532368	0.599357	0.827082	0.886853	0.987032	0.99	0.99	0.99	10175	4224	23202	9754	19882	6661	27285	13187	15133	8266	14011	7191	8771	3932	4931
P3C03	P3	C03	7709	3202	18823	26364	23054	33674	24266	34721	8722	3216	6432	7987	3056	5062	2343	4134	0.469174	0.498909	0.745318	0.767489	0.882957	0.869321	0.911947	0.893604	0.533815	0.600795	0.797465	0.872383	0.96728	0.99	0.984918	0.99	10739	4154	23261	9529	20823	7298	29165	12502	15577	6942	12892	6575	6292	3365	3493
P3C04	P3	C04	7916	3192	20168	25933	23536	33659	26684	33741	9682	3429	6869	8698	3606	5124	2755	4442	0.449824	0.482102	0.745941	0.748838	0.867143	0.86788	0.906417	0.883666	0.511799	0.580555	0.798132	0.851184	0.949956	0.99	0.978945	0.99	10765	4193	21110	8036	18385	6146	26265	10845	14209	8943	13353	9448	8544	5439	5943
P3C05	P3	C05	7565	3172	20838	28766	25123	33988	26116	29840	8311	2981	5195	6088	2551	4782	2269	6412	0.476505	0.515521	0.800446	0.825329	0.90782	0.876657	0.920063	0.823127	0.542157	0.620798	0.85645	0.938129	0.99	0.99	0.99	0.937778	11358	4502	20476	9969	19581	8142	25994	12723	15840	8118	13225	7393	7591	3661	4687
P3C06	P3	C06	7768	3264	18340	24742	23529	31354	25031	33116	8891	2975	6099	7359	4618	4809	3433	4241	0.466294	0.523161	0.75044	0.770755	0.835933	0.867019	0.879392	0.886474	0.530539	0.629999	0.802945	0.876096	0.915765	0.99	0.949757	0.99	10725	4747	19898	9409	19743	6704	24469	11134	15734	7502	11872	6636	8076	3585	5851
P3C07	P3	C07	7186	3136	16215	22031	18240	25944	18767	25179	6547	2391	6588	8695	6822	6685	6355	7728	0.523265	0.567396	0.711091	0.717015	0.727795	0.795121	0.747034	0.765156	0.595359	0.683268	0.760843	0.815011	0.7973	0.927961	0.80681	0.871732	9009	4941	22296	9436	18847	5457	26388	10857	6728	3445	7759	4665	4937	2210	4180
P3C08	P3	C08	7207	3348	13727	22270	17894	27244	19133	26988	6318	2426	5792	8731	7054	6251	6243	7183	0.532865	0.579841	0.703263	0.718364	0.717252	0.813375	0.75398	0.789793	0.606281	0.698253	0.752468	0.816545	0.78575	0.949265	0.814311	0.8998	9531	4466	18050	9522	16197	7247	22025	11251	7439	3845	7757	4428	5706	2740	5855
P3C09	P3	C09	7694	2964	14016	19971	16534	27451	18630	25981	6720	2356	7096	8674	7624	7406	5418	8017	0.533787	0.557143	0.663888	0.69719	0.684411	0.787532	0.774701	0.764192	0.60733	0.67092	0.710338	0.792477	0.749773	0.919104	0.83669	0.870634	9227	4391	17497	7445	14500	5416	20429	8480	7924	4248	10335	5769	7988	3713	7979
P3C10	P3	C10	7036	2927	14388	22416	18872	30236	20255	29430	6206	2351	6339	8162	6915	6239	4858	6643	0.53134	0.554566	0.694167	0.733076	0.731842	0.828951	0.806554	0.815846	0.604546	0.667817	0.742735	0.833268	0.801733	0.967443	0.871092	0.929482	9306	3164	20706	9273	16396	6662	24180	10268	6642	3215	8217	4312	5651	2619	5615
P3C11	P3	C11	7818	3290	17448	24214	27965	32005	23590	33007	11120	4503	8714	10505	5720	6795	2716	5440	0.412821	0.422174	0.666921	0.697428	0.830191	0.824871	0.896754	0.858507	0.469698	0.508388	0.713584	0.792747	0.909476	0.962681	0.968509	0.978085	10261	5074	23793	10927	20105	9023	27389	12771	15620	7876	11523	6009	6822	3340	4799
P3C12	P3	C12	7979	3435	18303	23061	26438	31883	23458	31438	7247	2547	6933	9503	6645	6837	3807	7168	0.524038	0.574223	0.725273	0.708175	0.799142	0.823425	0.86037	0.814329	0.596238	0.691488	0.776018	0.804963	0.87546	0.960993	0.929214	0.927755	10577	5431	25334	11064	20106	8076	28885	11954	8593	4800	11320	6143	7058	3427	6554
P3D01	P3	D01	7874	3270	19949	26628	24679	33527	24786	34551	9684	3368	6762	9398	3892	5204	2535	4141	0.448457	0.492618	0.746846	0.739133	0.863778	0.865637	0.907214	0.892975	0.510243	0.593219	0.7991	0.840152	0.94627	0.99	0.979806	0.99	10312	4484	22014	10281	19706	9596	31135	14671	15808	8459	15855	7829	8684	5127	5411
P3D02	P3	D02	7731	2837	19004	28671	25560	34234	24132	35029	8959	3143	6063	6882	3349	4508	2347	3710	0.463212	0.474415	0.758128	0.80643	0.884154	0.88364	0.911364	0.904231	0.527031	0.571298	0.811172	0.916647	0.968591	0.99	0.984288	0.99	10182	4369	22748	8016	20114	7276	28260	11877	16511	8282	12476	7435	7344	4826	4259
P3D03	P3	D03	7658	2722	18371	24824	24232	28620	24766	33533	10462	3661	6909	8182	5154	4977	3692	3869	0.422627	0.426445	0.726701	0.752106	0.82461	0.851862	0.870265	0.896556	0.480855	0.513532	0.777546	0.854898	0.903361	0.99	0.939901	0.99	10353	4454	19308	10350	18854	8426	26378	13680	17885	7719	13715	6642	8638	3718	5079
P3D04	P3	D04	7540	3109	9988	21197	9153	24782	7130	21830	12332	4312	12413	12697	17678	13879	17836	15506	0.379428	0.418946	0.445873	0.625391	0.341135	0.641008	0.285588	0.58469	0.431705	0.504502	0.477069	0.710865	0.373714	0.7481	0.30844	0.66613	10451	4458	15731	8130	15056	5744	22330	9806	12208	6689	11489	7434	8499	4670	8812
P3D05	P3	D05	7505	3430	19634	27094	23955	27184	23958	33391	8731	3645	5600	6974	4372	4223	3299	3736	0.462244	0.484806	0.778077	0.795292	0.84566	0.86554	0.878967	0.899372	0.525931	0.583811	0.832516	0.903987	0.926421	0.99	0.949299	0.99	10650	4370	19938	8620	18265	6925	24929	10859	16356	8050	14245	8465	8618	4625	5956
P3D06	P3	D06	7455	3118	20027	28863	25018	32393	24309	31380	8737	3172	5315	5585	3443	3970	2598	3802	0.460413	0.495707	0.790269	0.837872	0.879027	0.890823	0.903445	0.891933	0.523847	0.596939	0.845561	0.952386	0.962975	0.99	0.975736	0.99	9763	3805	21381	10440	20367	9472	28133	14058	13984	6569	10101	6706	5182	2889	2815
P3D07	P3	D07	7064	3125	16408	22376	16993	28113	15902	25653	6163	2419	4907	7875	6483	6448	5838	7155	0.534059	0.563672	0.769787	0.739678	0.723846	0.813431	0.731463	0.781913	0.60764	0.678783	0.823646	0.840772	0.792974	0.94933	0.789992	0.890823	9736	4627	20947	10624	18927	7044	24912	11563	6441	3544	6239	4535	4518	2529	3894
P3D08	P3	D08	6974	3135	13504	21252	13703	26185	14602	26337	5923	2513	5990	8783	7417	5896	7452	7354	0.540746	0.555064	0.692726	0.707574	0.648816	0.816215	0.662102	0.781722	0.615248	0.668417	0.741194	0.804281	0.710779	0.952579	0.715081	0.890606	9691	4939	21439	9907	16982	8055	24006	11232	6717	3772	6503	4008	4255	2562	3780
P3D09	P3	D09	6817	3053	13079	20507	14378	22074	14712	27120	6306	2390	6524	8466	7930	5705	6937	7168	0.51947	0.560904	0.667194	0.707797	0.644522	0.794629	0.679569	0.790947	0.59104	0.675449	0.713875	0.804534	0.706075	0.927387	0.733946	0.901116	9173	4418	19953	9884	17644	7730	23705	12403	7741	4256	8005	5009	5364	3270	4849
P3D10	P3	D10	7155	3388	15036	21797	18532	27689	18408	26394	6497	2419	5334	8260	6669	6041	5247	6260	0.524099	0.583434	0.738144	0.725189	0.735368	0.820901	0.778186	0.808293	0.596307	0.70258	0.78979	0.824302	0.805596	0.958048	0.840454	0.920877	9079	4624	22005	10109	18672	7885	26295	11805	6493	4164	7234	4484	4729	2548	4286
P3D11	P3	D11	7102	3202	17982	25599	26039	26881	23537	29832	11284	4542	7188	7448	4963	4783	3012	5182	0.386272	0.413481	0.714422	0.774624	0.839914	0.848945	0.886549	0.852002	0.439491	0.497921	0.764407	0.880494	0.920126	0.99	0.957488	0.970675	9248	4464	24043	10514	20850	7541	27935	13266	12608	6832	8751	6335	4939	2785	3167
P3D12	P3	D12	7363	3051	15191	24248	21579	31807	20904	29704	6499	2621	6959	9453	7035	6877	4586	7068	0.531164	0.537906	0.685824	0.719504	0.754141	0.822226	0.820086	0.807789	0.604346	0.647754	0.733809	0.817841	0.826163	0.959594	0.885707	0.920303	10141	4813	23874	11223	22354	8940	26824	13642	7834	4298	9539	5418	6097	2816	4632
P3E01	P3	E01	6984	2646	20682	27864	24051	33079	24037	33023	9253	3284	7597	9072	4771	5701	3271	4551	0.430129	0.446206	0.731355	0.754386	0.834467	0.852991	0.880218	0.878879	0.48939	0.537328	0.782526	0.85749	0.914159	0.99	0.95065	0.99	10183	4227	21326	10324	17739	8547	27878	13291	14431	7608	15625	7181	9154	4612	7805
P3E02	P3	E02	6464	2850	19851	26264	23238	26729	23150	32086	7776	2951	6080	6804	4379	4051	2825	3353	0.453933	0.491295	0.765532	0.794242	0.841438	0.868389	0.891242	0.905387	0.516474	0.591625	0.819093	0.902794	0.921796	0.99	0.962556	0.99	9731	3934	19431	10097	18879	7834	27342	12754	14915	7351	12168	8071	7159	4509	4367
P3E03	P3	E03	6488	2910	17292	26797	20513	30658	22845	28225	8072	3315	6359	8671	5894	5278	4516	3658	0.445604	0.46747	0.731132	0.755526	0.776802	0.853128	0.834948	0.885268	0.506998	0.562935	0.782287	0.858786	0.850987	0.99	0.901757	0.99	10052	4755	18993	8925	17611	6613	24528	10994	14750	7944	13096	7526	8989	4846	6953
P3E04	P3	E04	7122	2707	18592	27334	24463	34509	24693	33199	8088	2726	4825	6700	3268	4404	2651	3373	0.468245	0.498251	0.793953	0.803138	0.882154	0.886824	0.90305	0.907771	0.532758	0.600002	0.849503	0.912905	0.9664	0.99	0.975309	0.99	9434	4269	19875	8990	18374	7868	24971	11351	15107	8705	13856	8519	9047	5634	6680
P3E05	P3	E05	6983	2871	16157	28044	20675	34324	23388	31024	8818	3049	6196	7489	6282	4600	4454	6742	0.441934	0.484966	0.722811	0.789238	0.766962	0.881821	0.840026	0.82148	0.502822	0.584004	0.773384	0.897106	0.840208	0.99	0.907242	0.935901	9566	4548	21379	10069	20279	8472	27544	13097	14843	8429	11502	8331	6150	4032	3405
P3E06	P3	E06	6145	2810	17766	25251	24777	34027	24197	31813	7230	2724	3859	6124	3319	4614	2737	5070	0.459439	0.50777	0.821549	0.804813	0.881869	0.880593	0.898381	0.862538	0.522739	0.611465	0.87903	0.914809	0.966089	0.99	0.970267	0.982678	10007	4634	19686	10095	19499	7781	26764	13045	13566	8148	10361	6644	6234	3438	4040
P3E07	P3	E07	6387	2923	14782	20813	11946	26032	13316	24798	5883	2308	5566	9096	6495	5721	7348	9396	0.520538	0.558784	0.72646	0.695877	0.647796	0.819828	0.644406	0.725215	0.592256	0.672897	0.777287	0.790985	0.709661	0.956796	0.695969	0.826228	9497	5030	21616	10443	19346	7701	25515	12110	6817	4098	6471	4133	4367	2382	3661
P3E08	P3	E08	6495	2821	12402	20670	12864	18734	11952	24074	6152	2190	5777	8508	8184	4939	6735	7299	0.513561	0.562961	0.682216	0.70841	0.611174	0.791366	0.639589	0.767348	0.584317	0.677927	0.729948	0.805231	0.669542	0.923578	0.690767	0.874229	9369	5012	18948	10112	17844	8083	25338	11273	6900	4301	6591	4150	4792	2570	4765
P3E09	P3	E09	6503	2318	12658	20804	12960	27811	12934	23334	6065	1922	6447	8067	8195	6864	7584	9296	0.517425	0.546698	0.662549	0.720585	0.612621	0.802048	0.630373	0.715109	0.588714	0.658343	0.708905	0.819069	0.671127	0.936045	0.680814	0.814714	9044	4652	19404	9436	18717	8425	24469	12220	7586	4696	7375	4215	5245	2927	4208
P3E10	P3	E10	5749	2473	12559	20729	11882	27401	15448	27281	5179	1884	6213	8165	6455	6147	7401	7188	0.52608	0.567592	0.669028	0.717415	0.647979	0.81677	0.676091	0.791465	0.598561	0.683504	0.715838	0.815467	0.709862	0.953227	0.730189	0.901705	9881	5025	15877	9841	13788	6868	19249	10196	6585	3669	7966	4219	6050	2761	6452
P3E11	P3	E11	6593	2560	16335	21599	22926	30779	23155	32683	10211	3560	7312	7948	5238	6804	3545	5242	0.392347	0.418301	0.690785	0.731005	0.814018	0.818961	0.867228	0.86178	0.446403	0.503724	0.739117	0.830913	0.891757	0.955783	0.936621	0.981814	9386	4737	22526	9542	19204	8284	26432	12125	13215	7665	11233	5530	7414	3715	5292
P3E12	P3	E12	6689	2504	14127	22934	17088	30839	17928	30077	6331	1961	6814	8878	7944	7078	5969	7343	0.513748	0.560806	0.67461	0.720923	0.682646	0.813329	0.75022	0.803768	0.58453	0.675332	0.72181	0.819454	0.74784	0.949211	0.81025	0.915722	9801	4839	22011	8891	19949	7270	26172	11427	8695	4904	10329	5851	6540	3081	5359
P3F01	P3	F01	6921	2713	21474	28945	25888	28056	24800	31823	8631	2957	5323	7770	3628	4408	2841	6114	0.445023	0.478483	0.801358	0.78837	0.877084	0.864219	0.897218	0.838838	0.506337	0.576197	0.857427	0.896119	0.960846	0.99	0.96901	0.955677	9724	4657	22178	9130	19012	9228	31417	12993	12720	7530	12434	6824	6880	4674	5948
P3F02	P3	F02	7393	2638	21416	30090	25008	34355	23800	34905	8155	2685	4504	6677	2931	4552	2168	3877	0.475495	0.495585	0.826235	0.818397	0.895093	0.883003	0.916513	0.900031	0.541007	0.596792	0.884043	0.93025	0.980575	0.99	0.989849	0.99	10048	4648	18460	8577	17132	6858	23371	9845	15960	8595	14621	9511	10359	6834	10479
P3F03	P3	F03	7148	2185	13859	21190	18788	31550	19787	30481	8914	2579	5519	8526	6840	7289	6029	5955	0.445026	0.458648	0.715192	0.713084	0.733104	0.812328	0.766463	0.836563	0.50634	0.552311	0.765232	0.810543	0.803117	0.948042	0.827792	0.953085	9939	4596	21480	10413	18903	9238	29192	13265	11972	7214	9378	5521	5306	3394	3717
P3F04	P3	F04	6737	2336	19112	29265	25309	34233	24118	34371	7671	2491	4019	6352	3215	4620	2366	3821	0.467587	0.483944	0.82625	0.821658	0.887288	0.88109	0.910663	0.899953	0.53201	0.582774	0.88406	0.933957	0.972025	0.99	0.983531	0.99	9547	4476	20009	9045	20757	6937	28152	11364	13807	8077	11700	8730	7667	5010	4474
P3F05	P3	F05	6637	2474	16298	23407	16697	32080	16859	33527	9024	3346	6991	10189	9709	6749	8621	5258	0.423792	0.425086	0.699815	0.69672	0.632318	0.826187	0.661656	0.864432	0.48218	0.511895	0.748779	0.791943	0.692705	0.964216	0.7146	0.984836	9507	4830	17269	9676	18861	7436	26942	11386	14021	8077	11467	7816	9475	4811	6638
P3F06	P3	F06	6620	2575	13646	23682	11542	25631	11938	25070	5807	2126	5900	8178	7869	6280	8137	6787	0.532711	0.547756	0.698148	0.743315	0.594611	0.803203	0.59467	0.786954	0.606106	0.659616	0.746995	0.844905	0.651397	0.937393	0.642253	0.896566	8912	4873	19038	10181	19647	7592	26283	11197	5997	3674	5395	3902	3984	2536	3147
P3F07	P3	F07	6943	2352	13180	21699	11437	25656	9680	19700	5775	1928	5841	8368	8095	7004	7113	7885	0.545919	0.549533	0.692918	0.721688	0.585552	0.785548	0.576431	0.714156	0.621134	0.661756	0.741399	0.820323	0.641473	0.916789	0.622555	0.813629	8949	4385	16161	8077	15787	5088	23212	8895	7357	3843	7501	5530	5843	3169	5638
P3F08	P3	F08	6721	2510	13970	22364	10779	26590	11293	24587	6023	2320	5968	9097	8887	6778	9746	8295	0.527385	0.519669	0.700672	0.710848	0.548103	0.796871	0.536765	0.747734	0.600047	0.625793	0.749696	0.808002	0.600448	0.930003	0.579715	0.851884	9531	4556	16819	7957	14104	5152	17519	7519	9013	4937	10298	6247	8517	4410	10999
P3F09	P3	F09	5737	2398	12973	22844	12435	26734	13639	24941	5352	1880	5998	8542	8464	6352	8310	8247	0.51736	0.560542	0.683833	0.72784	0.595005	0.808015	0.621395	0.751507	0.588639	0.675014	0.731679	0.827317	0.651828	0.94301	0.671117	0.856181	9551	4823	18182	8888	16649	5989	23303	9629	7478	4285	7810	5262	5850	3402	5863
P3F10	P3	F10	5919	2644	12974	22529	12717	27097	13649	25350	5862	2193	6490	8430	8098	6815	7565	7550	0.502419	0.54662	0.666564	0.727704	0.610954	0.799039	0.643396	0.770517	0.571641	0.658248	0.713201	0.827162	0.6693	0.932533	0.694878	0.877839	9368	5069	19383	10333	18478	7585	25050	12082	6955	4270	7192	4248	5065	2559	4150
P3F11	P3	F11	6641	2794	17912	27314	23367	32710	20695	33565	10178	3947	6685	8356	4837	6063	2864	4735	0.394851	0.414479	0.728219	0.765742	0.8285	0.843628	0.878433	0.876371	0.449252	0.499122	0.77917	0.870398	0.907622	0.984572	0.948722	0.99	9160	5197	22568	10840	21077	8007	28130	12578	13286	7963	9640	6257	6278	3098	3467
P3F12	P3	F12	6329	2962	12236	23133	17490	25595	18360	30118	6379	2317	5372	10692	6872	5945	6046	6814	0.498033	0.561091	0.694911	0.683902	0.717921	0.811509	0.752274	0.815499	0.56665	0.675675	0.743532	0.777373	0.786484	0.947087	0.812468	0.929087	9945	4531	24798	10318	21163	9169	26398	12987	7166	3436	8831	3859	5807	2636	4373
P3G01	P3	G01	8031	2606	21254	29575	27432	34069	21108	27621	10011	2678	5537	6865	3500	4683	2098	4924	0.445128	0.493187	0.793326	0.811608	0.886849	0.879155	0.909592	0.848702	0.506456	0.593904	0.848832	0.922533	0.971543	0.99	0.982375	0.966915	9933	4679	19166	8598	17532	5834	25001	10051	17291	9831	17420	9733	13047	7764	13276
P3G02	P3	G02	7537	2554	18929	29346	24704	34175	22822	34858	8640	2683	5072	7984	4040	4702	2683	3943	0.465908	0.487684	0.788675	0.786124	0.859449	0.879054	0.894805	0.898379	0.5301	0.587277	0.843856	0.893566	0.941527	0.99	0.966404	0.99	10151	4733	21127	9609	20571	7414	28146	12942	13509	7157	11573	7657	6770	4287	4149
P3G03	P3	G03	7939	2531	18270	28094	24482	34838	19885	32632	8566	2413	5035	6212	3738	4101	2321	3356	0.481006	0.511934	0.783952	0.818924	0.867541	0.894681	0.895479	0.906747	0.547277	0.616479	0.838802	0.930849	0.950392	0.99	0.967132	0.99	9359	4826	16908	10191	13220	5366	17171	9162	11174	6753	13183	6674	10812	4102	11814
P3G04	P3	G04	7458	2756	15701	27940	23897	34452	23984	34389	8225	2610	3431	6938	3506	4517	2860	4290	0.475547	0.513604	0.820667	0.801078	0.872058	0.884087	0.893459	0.889087	0.541066	0.61849	0.878086	0.910564	0.95534	0.99	0.96495	0.99	9668	4398	17961	7802	17037	5565	22599	9726	12141	7293	10792	7936	7348	5364	5195
P3G05	P3	G05	6948	2532	17355	29234	22418	33934	23522	27795	7714	2305	4460	7313	4022	4934	3200	4076	0.473878	0.523465	0.795554	0.799901	0.847882	0.873058	0.880248	0.872109	0.539167	0.630365	0.851216	0.909226	0.928856	0.99	0.950683	0.99	9453	4664	16404	9592	19532	7114	27864	13146	11344	7416	7825	6646	4998	3621	3060
P3G06	P3	G06	6841	2351	17272	27757	20522	33776	17523	34199	8871	2848	6009	7672	6546	5196	3749	4464	0.4354	0.452202	0.741893	0.783454	0.758165	0.866674	0.823759	0.884541	0.495387	0.544549	0.7938	0.890531	0.83057	0.99	0.889673	0.99	9547	4559	18546	9081	17152	6340	25649	11898	13516	8065	11032	7473	7471	4049	5451
P3G07	P3	G07	6979	2759	13493	21262	11043	26921	10484	24781	5864	2207	6496	8547	8961	7050	8736	8909	0.543409	0.555578	0.675021	0.713275	0.55204	0.79247	0.545473	0.73556	0.618278	0.669036	0.72225	0.81076	0.60476	0.924867	0.58912	0.838013	10300	5108	19717	9231	17771	6539	25139	11212	6588	3927	6180	4178	4443	2366	4217
P3G08	P3	G08	6787	2824	13404	23008	12805	27932	11419	24057	5782	2229	6095	9308	8163	6760	6145	7158	0.539979	0.558876	0.68742	0.711969	0.610692	0.805142	0.650137	0.770687	0.614376	0.673007	0.735516	0.809276	0.669014	0.939656	0.702158	0.878034	9267	4664	17941	10017	16508	6028	21512	11515	7648	4100	8120	4842	5740	2718	6776
P3G09	P3	G09	7344	2815	13847	23614	14021	28837	12962	26130	6687	2199	6029	8665	8529	6536	7465	6826	0.523412	0.561428	0.696669	0.731559	0.621774	0.815226	0.634552	0.792875	0.595526	0.676081	0.745413	0.831544	0.681154	0.951425	0.685327	0.903312	8851	4872	18669	8570	17127	6533	23710	11656	6722	4158	7841	4938	5327	3051	5082
P3G10	P3	G10	6973	2381	12519	23477	12706	29085	12521	28611	6603	2036	6718	8430	8612	6955	7725	7665	0.513627	0.539054	0.650777	0.735795	0.596022	0.80702	0.618443	0.788703	0.584393	0.649137	0.69631	0.836358	0.652943	0.941848	0.667929	0.898559	9305	4830	22143	10240	17963	7614	24606	12046	6665	4038	8427	4325	5234	2651	4271
P3G11	P3	G11	6852	2760	15926	25125	23489	32485	21991	26926	11413	3683	8442	8709	5776	6346	3451	4050	0.375144	0.428372	0.653562	0.742596	0.802631	0.836574	0.864358	0.869254	0.42683	0.515852	0.699289	0.844089	0.879283	0.976339	0.933521	0.99	9252	4359	24215	10402	19707	8095	27816	13770	14163	6968	11619	6468	6686	3573	4770
P3G12	P3	G12	7117	2634	14678	27271	18277	31872	23066	33613	13350	3966	10837	10029	6157	6824	4463	5067	0.34773	0.399091	0.575269	0.731126	0.748015	0.823651	0.83788	0.869002	0.39564	0.480592	0.615519	0.831051	0.819451	0.961257	0.904924	0.99	9599	4995	24058	11284	23209	8055	29708	15424	16257	7364	14334	7155	7847	2975	4552
P3H01	P3	H01	7692	2930	14843	25887	22086	31745	20937	31221	11888	3391	8227	12515	8281	6993	5623	7501	0.39285	0.463534	0.64339	0.674106	0.727303	0.81948	0.788291	0.806286	0.446975	0.558195	0.688405	0.766237	0.796761	0.956389	0.851367	0.918591	9985	4751	21095	9004	17594	7564	29518	14462	17394	8570	16633	9695	9169	6300	8739
P3H02	P3	H02	8497	2668	16048	30821	24131	33491	25166	34272	10426	2874	4873	7928	4465	5310	3468	4437	0.44903	0.481415	0.767076	0.795401	0.843859	0.863148	0.878885	0.885375	0.510896	0.579727	0.820746	0.904111	0.924449	0.99	0.949211	0.99	9654	4807	19074	10168	17847	8439	26007	13726	15025	7953	13940	7524	9417	4641	7734
P3H03	P3	H03	7812	2636	19201	29749	23191	34337	24293	34417	9266	2588	5294	6633	4338	4548	3238	4298	0.457431	0.504594	0.783874	0.817685	0.842421	0.88304	0.882387	0.888984	0.520454	0.60764	0.838719	0.92944	0.922873	0.99	0.952993	0.99	9838	4765	21022	8768	19436	6521	27102	12632	17315	10445	14661	9353	10021	5978	8753
P3H04	P3	H04	7796	2974	19076	29439	22051	34266	23969	34625	9575	3279	6248	8433	5787	4647	4516	4056	0.448794	0.475612	0.753278	0.777329	0.792119	0.88058	0.84146	0.895142	0.510627	0.572739	0.805982	0.883569	0.867767	0.99	0.908791	0.99	9854	5080	18409	9356	19007	6999	26725	13299	14183	8403	11226	7666	7721	4128	6264
P3H05	P3	H05	7478	2484	15205	23615	22688	34108	23649	34747	8801	2794	4863	6183	5318	4730	4068	4016	0.459365	0.470633	0.757674	0.792503	0.810112	0.878212	0.853231	0.896396	0.522654	0.566744	0.810686	0.900817	0.887479	0.99	0.921504	0.99	9687	4979	19548	9429	18774	7295	27800	14610	13954	8312	10286	6634	6147	3394	4537
P3H06	P3	H06	6771	2382	20138	31088	22641	34444	25109	33916	8554	2545	5272	6850	5009	4474	3939	4376	0.441827	0.483458	0.792523	0.819442	0.818843	0.88504	0.864397	0.88572	0.5027	0.582188	0.847973	0.931438	0.897043	0.99	0.933563	0.99	9429	4366	19904	8493	18890	6978	26268	13294	14899	8905	12791	8739	8236	4961	5533
P3H07	P3	H07	7762	2560	12771	24777	10300	29711	10508	28170	6854	2083	7894	10105	9355	7007	10192	8336	0.531062	0.551368	0.618001	0.710309	0.52404	0.809167	0.507633	0.771654	0.60423	0.663966	0.661241	0.807389	0.574086	0.944354	0.548252	0.879135	9274	5267	18108	10196	17161	7638	24115	12734	7665	4355	8268	4832	5623	2844	5465
P3H08	P3	H08	7028	2296	13796	21695	10490	28831	10401	27309	6540	2042	7191	9027	9424	7044	10012	8891	0.517983	0.529276	0.657359	0.706171	0.526765	0.803652	0.509528	0.754392	0.589349	0.637363	0.703352	0.802686	0.577072	0.937917	0.550299	0.859469	9735	4924	18884	8496	15422	5710	20957	9445	7634	4588	8800	6461	6099	4284	8508
P3H09	P3	H09	7727	2621	11856	19716	11815	23759	12530	25277	6605	2152	6304	9034	8673	6127	8762	7963	0.539143	0.549131	0.652863	0.685774	0.576679	0.794988	0.588484	0.760439	0.613424	0.661272	0.698542	0.779501	0.631752	0.927805	0.635572	0.866358	9470	5177	19693	9565	16754	7457	24511	11548	6834	4045	8228	4752	5664	3220	6069
P3H10	P3	H10	7099	2483	16700	24927	12809	29600	15960	24496	6701	2112	5406	8123	5847	5900	6516	5474	0.51442	0.54037	0.755451	0.754221	0.686589	0.833803	0.710091	0.817351	0.585295	0.650722	0.808307	0.857302	0.752159	0.973105	0.76691	0.931197	9017	4398	22208	9202	18585	6794	26392	12479	7140	3723	7952	4966	5647	3353	5555
P3H11	P3	H11	7425	2137	13444	21936	17730	31573	21647	33375	12418	3286	12128	10132	8624	7255	6265	5261	0.374187	0.394062	0.525731	0.684046	0.672763	0.81315	0.775545	0.863832	0.425742	0.474536	0.562515	0.777537	0.737013	0.949002	0.837601	0.984152	9540	5060	17935	10387	17119	8578	24049	15218	20365	9065	19695	8535	12690	5177	10929
P3H12	P3	H12	6849	2651	14089	23686	14063	32825	15045	27593	7272	2377	8796	9515	8318	6036	8182	9821	0.485022	0.527247	0.615643	0.713412	0.628345	0.844677	0.647738	0.737505	0.551847	0.63492	0.658718	0.810916	0.688353	0.985796	0.699567	0.840229	10645	5287	31595	11754	23622	8358	30459	17112	3899	4281	6211	5350	4511	2673	3454
[truncated: 209 more columns]

## Sheet: Populations_lost
Environment	Populations lost during evolution due to evaporation, pipetting errors, or contamination
YPD 30°C	P1A02 (blank);P1A11 (blank);P1D07 (blank);P1D08 (blank);P1E06 (blank);P1E07 (blank);P1E08 (blank);P1G03 (blank);P1H03 (blank);P1B08 (contaminated);P1G02 (contaminated);P1G06 (contaminated);P1B09 (contaminated);P1D02 (contaminated);P1F12 (contaminated);P1H01 (contaminated);P1A07 (contaminated);P1D11 (contaminated)
SC 30°C	P2A08 (blank);P2D07 (blank);P2E01 (blank);P2E05 (blank);P2E07 (blank);P2F10 (blank);P2G03 (blank);P2G07 (blank);
SC 37°C	P3A01 (blank);P3A02 (blank);P3A04 (blank);P3A05 (blank);P3A06 (blank);P3A07 (blank);P3A08 (blank);P3A09 (blank);P3A11 (blank);P3B01 (blank);P3B02 (blank);P3B03 (blank);P3B04 (blank);P3B05 (blank);P3B09 (blank);P3B12 (blank);P3C01 (blank);P3C02 (blank);P3C08 (blank);P3C12 (blank);P3D01 (blank);P3D07 (blank);P3D08 (blank);P3D12 (blank);P3E01 (blank);P3E05 (blank);P3E06 (blank);P3E07 (blank);P3E09 (…

## Sheet: Killer_Virus_State
platewell	Plate	Well	G70_killer_activity	G1410_killer_activity	G2640_killer_activity	G5150_killer_activity	G7530_killer_activity	G10150_killer_activity
P1C04	P1	C04	2	1	0	0	0	0
P1G04	P1	G04	2	1	0	0	0	0
P1C06	P1	C06	2	2	1	0	0	0
P1E04	P1	E04	2	1	0	0	0	0
P1B03	P1	B03	2	2	0	0	0	0
P1B04	P1	B04	2	1	0	0	0	0
P1C02	P1	C02	2	0	0	0	0	0
P1G05	P1	G05	2	2	1	0	0	0
P1B02	P1	B02	2	1	0	0	0	0
P1C05	P1	C05	2	1	0	0	0	0
P1D03	P1	D03	2	0	0	0	0	0
P1F05	P1	F05	2	1	0	0	0	0
P1B11	P1	B11	2	1	0	0	0	0
P1C11	P1	C11	2	2	2	1	0	0
P1E11	P1	E11	2	1	0	0	0	0
P1F11	P1	F11	2	1	0	0	0	0
P1G11	P1	G11	2	1	0	0	0	0
P1H11	P1	H11	2	2	1	0	0	0
P1E09	P1	E09	2	2	0	0	0	0
P1B07	P1	B07	2	1	0	0	0	0
P1C07	P1	C07	2	0	0	0	0	0
P1G09	P1	G09	2	0	0	0	0	0
P1G10	P1	G10	2	0	0	0	0	0
P1F07	P1	F07	2	0	0	0	0	0
P1C09	P1	C09	2	1	1	0	0	0
P1F08	P1	F08	2	1	1	0	0	0
P1D09	P1	D09	2	2	2	0	0	0
P1C08	P1	C08	2	1	1	0	0	0
P1F10	P1	F10	2	0	0	0	0	0
P1G08	P1	G08	2	2	1	1	1	0
P2G05	P2	G05	2	0	0	0	0	0
P2C02	P2	C02	2	1	1	0	0	0
P2G04	P2	G04	2	1	0	0	0	0
P2B05	P2	B05	2	1	2	2	0	0
P2D03	P2	D03	2	0	0	0	0	0
P2F02	P2	F02	2	1	0	0	0	0
P2E06	P2	E06	2	2	1	0	0	0
P2C05	P2	C05	2	2	2	0	0	0
P2C04	P2	C04	2	2	0	0	0	0
P2D06	P2	D06	2	1	1	0	0	0
P2C06	P2	C06	2	0	0	0	0	0
P2B04	P2	B04	2	1	1	0	0	0
P2B11	P2	B11	2	2	0	0	0	0
P2C11	P2	C11	2	2	2	0	0	0
P2D11	P2	D11	2	1	0	0	0	0
P2E11	P2	E11	2	2	2	0	0	0
P2F11	P2	F11	2	2	2	1	0	0
P2G11	P2	G11	2	2	2	1	0	0
P2G09	P2	G09	2	2	1	0	0	0
P2C10	P2	C10	2	2	0	0	0	0
P2D08	P2	D08	2	2	2	2	0	0
P2F09	P2	F09	2	2	2	0	0	0
P2B09	P2	B09	2	2	2	1	0	0
P2E08	P2	E08	2	1	0	0	0	0
P2B08	P2	B08	2	2	1	0	0	0
P2B10	P2	B10	2	1	1	1	1	1
P2G10	P2	G10	2	2	1	2	0	0
P2B07	P2	B07	2	0	0	0	0	0
P2F07	P2	F07	2	2	2	1	0	0
P2G08	P2	G08	2	2	0	0	0	0
P3D03	P3	D03	2	1	0	0	0	0
P3D02	P3	D02	2	0	0	0	0	0
P3F05	P3	F05	2	0	0	0	0	0
P3F03	P3	F03	2	0	0	0	0	0
P3G05	P3	G05	2	0	0	0	0	0
P3G02	P3	G02	2	0	0	0	0	0
P3C05	P3	C05	2	1	0	0	0	0
P3C04	P3	C04	2	0	0	0	0	0
P3D05	P3	D05	2	0	0	0	0	0
P3C03	P3	C03	2	0	0	0	0	0
P3G06	P3	G06	2	0	0	0	0	0
P3E02	P3	E02	2	0	0	0	0	0
P3B11	P3	B11	2	0	0	0	0	0
P3C11	P3	C11	2	0	0	0	0	0
P3D11	P3	D11	2	2	2	0	0	0
P3E11	P3	E11	2	1	0	0	0	0
P3F11	P3	F11	2	0	0	0	0	0
P3G11	P3	G11	2	0	0	0	0	0
P3F07	P3	F07	2	0	0	0	0	0
P3F09	P3	F09	2	1	1	0	0	0
P3G09	P3	G09	2	0	0	0	0	0
P3B10	P3	B10	2	0	0	0	0	0
P3D10	P3	D10	2	0	0	0	0	0
P3B08	P3	B08	2	0	0	0	0	0
P3C07	P3	C07	2	0	0	0	0	0
P3B07	P3	B07	2	2	2	0	0	0
P3E08	P3	E08	2	2	2	0	0	0
P3G10	P3	G10	2	0	0	0	0	0
P3C10	P3	C10	2	0	0	0	0	0
P3D09	P3	D09	2	1	1	0	0	0

## Sheet: Stat_test_record
Test	Well set	Group1	Group2	N1	N2	mean1	mean2	P-value	Test
Fitness Gain (full)	P1	diploid	alpha	29	6	0.205783	0.245567	0.00135806	Mann-Whitney U test
Fitness Gain (full)	P1	diploid	a	29	36	0.205783	0.232991	9.2461e-06	Mann-Whitney U test
Fitness Gain (full)	P1	alpha	a	6	36	0.245567	0.232991	0.352933	Mann-Whitney U test
Fitness Gain (full)	P2	diploid	alpha	32	8	0.0864114	0.102893	0.0187868	Mann-Whitney U test
Fitness Gain (full)	P2	diploid	a	32	42	0.0864114	0.12721	8.86432e-10	Mann-Whitney U test
Fitness Gain (full)	P2	alpha	a	8	42	0.102893	0.12721	0.000137043	Mann-Whitney U test
Fitness Gain (full)	P3	diploid	alpha	20	6	0.228021	0.379763	0.000185289	Mann-Whitney U test
Fitness Gain (full)	P3	diploid	a	20	25	0.228021	0.373556	1.52023e-08	Mann-Whitney U test
Fitness Gain (full)	P3	alpha	a	6	25	0.379763	0.373556	0.317393	Mann-Whitney U test
Fitness Gain (first half)	P1	diploid	alpha	29	6	0.365006	0.441055	0.00087561	Mann-Whitney U test
Fitness Gain (first half)	P1	diploid	a	29	36	0.365006	0.403389	0.000187889	Mann-Whitney U test
Fitness Gain (first half)	P1	alpha	a	6	36	0.441055	0.403389	0.0888437	Mann-Whitney U test
Fitness Gain (first half)	P2	diploid	alpha	32	8	0.0739941	0.139327	0.00192022	Mann-Whitney U test
Fitness Gain (first half)	P2	diploid	a	32	42	0.0739941	0.202904	8.38543e-11	Mann-Whitney U test
Fitness Gain (first half)	P2	alpha	a	8	42	0.139327	0.202904	1.36825e-05	Mann-Whitney U test
Fitness Gain (first half)	P3	diploid	alpha	20	6	0.326935	0.610366	0.000146702	Mann-Whitney U test
Fitness Gain (first half)	P3	diploid	a	20	25	0.326935	0.580538	7.86989e-09	Mann-Whitney U test
Fitness Gain (first half)	P3	alpha	a	6	25	0.610366	0.580538	0.0379489	Mann-Whitney U test
Fitness Gain (second half)	P1	diploid	alpha	29	6	0.0209844	0.0222072	0.49127	Mann-Whitney U test
Fitness Gain (second half)	P1	diploid	a	29	36	0.0209844	0.0288656	0.0170839	Mann-Whitney U test
Fitness Gain (second half)	P1	alpha	a	6	36	0.0222072	0.0288656	0.0832016	Mann-Whitney U test
Fitness Gain (second half)	P2	diploid	alpha	32	8	0.0498847	0.0329184	0.0187868	Mann-Whitney U test
Fitness Gain (second half)	P2	diploid	a	32	42	0.0498847	0.0248526	4.43102e-07	Mann-Whitney U test
Fitness Gain (second half)	P2	alpha	a	8	42	0.0329184	0.0248526	0.0349389	Mann-Whitney U test
Fitness Gain (second half)	P3	diploid	alpha	20	6	0.0496267	0.055451	0.242005	Mann-Whitney U test
Fitness Gain (second half)	P3	diploid	a	20	25	0.0496267	0.0627435	0.0102132	Mann-Whitney U test
Fitness Gain (second half)	P3	alpha	a	6	25	0.055451	0.0627435	0.152682	Mann-Whitney U test
dN/dS	All wells	diploid	alpha	36	18	1.07867	1.18862	0.163116	Mann-Whitney U test
dN/dS	All wells	diploid	a	36	35	1.07867	0.852884	0.00177516	Mann-Whitney U test
dN/dS	All wells	alpha	a	18	35	1.18862	0.852884	0.000247069	Mann-Whitney U test
dN/dS	P1	diploid	alpha	12	6	1.05168	1.07997	0.481325	Mann-Whitney U test
dN/dS	P1	diploid	a	12	11	1.05168	0.807198	0.08306	Mann-Whitney U test
dN/dS	P1	alpha	a	6	11	1.07997	0.807198	0.0725161	Mann-Whitney U test
dN/dS	P2	diploid	alpha	12	6	0.992704	1.17813	0.407436	Mann-Whitney U test
dN/dS	P2	diploid	a	12	12	0.992704	0.958325	0.332503	Mann-Whitney U test
dN/dS	P2	alpha	a	6	12	1.17813	0.958325	0.336708	Mann-Whitney U test
dN/dS	P3	diploid	alpha	12	6	1.19164	1.30775	0.212988	Mann-Whitney U test
dN/dS	P3	diploid	a	12	12	1.19164	0.78932	0.00552848	Mann-Whitney U test
dN/dS	P3	alpha	a	6	12	1.30775	0.78932	0.000442284	Mann-Whitney U test
